---

1        **MMP12 Knockout Prevent Weight and Muscle Loss Induced by Cancer Cachexia**

2        Lingbi Jiang<sup>1</sup>, Mingming Yang<sup>1,3</sup>, Shihui He<sup>1</sup>, Zhengyang Li<sup>1</sup>, Haobin Li<sup>1</sup>, Ting Niu<sup>1</sup>, Dehuan Xie<sup>3</sup>, Yan  
3        Mei<sup>3</sup>, Xiaodong He<sup>1</sup>, Lili Wei<sup>4</sup>, Pinzhu Huang<sup>4</sup>, Mingzhe Huang<sup>4</sup>, Rongxin Zhang<sup>2,1</sup>, Lijing Wang<sup>1\*</sup>,  
4        Jiangchao Li<sup>1\*</sup>

5        Authors' affiliations:

6            1.    Institute of Basic Medical Sciences, School of Life Sciences and Biopharmaceuticals, Guang-  
7        dong Pharmaceutical University, Guangzhou, 510006, China.

8            2.    Guangdong Province Key Laboratory for Biotechnology Drug Candidates, Guangdong Phar-  
9        maceutical University, Guangzhou, 510006, China.

10          3.    The State Key Laboratory of Oncology in South China, Collaborative Innovation Center for  
11        Cancer Medicine, Sun Yat-Sen University Cancer Center, Guangzhou 510060, China.

12          4.    The Sixth Affiliated Hospital, Sun Yat-sen University, Guangzhou 510060, China.

13        **\*Corresponding author**

14        Jiangchao Li, Associate Prof. or Prof. Lijing Wang

15        Institute of Basic Medical Sciences, School of Life Sciences and Biopharmaceuticals, Guangdong Phar-  
16        maceutical University, Guangzhou, 510006, China.

17        Address: No. 280 Waihuan Rd. E, Higher Education Mega Center, Guangzhou 510006, China.

18        Office Phone: 86-20-39352126; E-mail: [lijiangchao@gdpu.edu.cn](mailto:lijiangchao@gdpu.edu.cn) or [wanglijing@gdpu.edu.cn](mailto:wanglijing@gdpu.edu.cn)

19        **Manuscript Conflict-of-interest Disclosure:**

20        The authors declare no potential conflicts of interest.

21

---

22 **Abstract**

23 Weight loss and muscle wasting can have devastating impacts on survival and quality of life of patients  
24 with cancer cachexia. Here, we have established a hybrid mouse of  $Apc^{Min/+}$  mice and MMP12 knockout  
25 mice ( $Apc^{Min/+}; MMP12^{-/-}$ ) and found that knockout MMP12 can suppress the weight and muscle loss of  
26  $Apc^{Min/+}$  mice. In detail, we found that interleukin 6 was highly upregulated in the serum of cancer pa-  
27 tients and MMP12 was increased in muscle of tumor-bearing mice. Interestingly, the interleukin 6 se-  
28 creted by tumor cells led to MMP12 overexpression in the macrophages, which further resulted in deg-  
29 radation of insulin and insulin-like growth factor 1 and interruption of glycolipid metabolism. Notably,  
30 depletion of MMP12 prevented weight loss of  $Apc^{Min/+}$  mice. Our study uncovers the critical role of  
31 MMP12 in controlling weight and highlights the great potential of MMP12 in the treatment of cancer  
32 cachexia.

33

34 **Keywords:**

35 MMP12; Macrophage; IL-6; Weight and Muscle loss; Cancer cachexia;  $Apc^{Min/+}$ ;  $MMP12^{-/-}$

36

37 **Running title:**

38 Interleukin-6 Derived from Cancer Cells Increased MMP12 of Macrophage Aggravated Cancer Cachexia

39

40

41

42

---

## 43 **1. Introduction**

44 Many studies have shown that rapid skeletal muscle mass loss is a characteristic of cancer cachexia (CAC)  
45 in colorectal cancer (CRC) patients with advanced cancer stages, which cannot be completely reversed  
46 by conventional nutritional support or drugs therapy (Bonetto et al., 2016; Pettersen et al., 2017; Song et  
47 al., 2019; Yang et al., 2018; Yang et al., 2019; Yuan et al., 2015). Muscle loss caused by tumor develop-  
48 ment or growth would occur in various cancers, such as pancreatic cancer, esophageal cancer, gastric  
49 cancer, lung cancer, liver cancer and CRC. According to the statistics, nearly 80% of cancer patients  
50 have skeletal muscle loss as a late outcome, and the mortality rate is as high as 30% (Baracos et al., 2018;  
51 Herremans et al., 2019; Tisdale and Michael, 2002). 2018 estimates of global cancer data show that CRC  
52 is the third most common malignant tumor in the world, and its incidence and mortality are increasing  
53 year by year (Bray et al., 2018; Brody, 2015; Lin et al., 2016; Siegel et al., 2014), and cachexia muscle  
54 loss induced by CRC is an important cause of death. Although more and more attention has been paid to  
55 CAC in recent years and great progress has been made in the diagnosis and treatment of CRC, the mor-  
56 tality rate of CRC has not decreased and has been younger (Brody, 2015; Center et al., 2009). The key  
57 is that the mechanism of how the inflammatory environment of tumor causes muscle loss is still not clear,  
58 and CAC involves a variety of immune cells, a variety of cytokines, and metabolic disorders (Daou, 2020).  
59 The tumor-induced pro-inflammatory response plays an important role in the progression of CAC. This  
60 metabolic dysfunction is caused by changes in glucose, lipid and protein metabolism, and may lead to  
61 the loss of skeletal muscle and adipose tissue when maintained for a long time (Fonseca et al., 2020;  
62 Lobato et al., 2018; Patel and Patel, 2017). To date, although several drugs have had positive clinical  
63 effects in increasing lean body mass, their effects on body function are limited. There are no effective

---

64 medical interventions or approved drug therapies that can completely reverse muscle loss caused by CAC,  
65 which brings difficulties to the treatment of chemotherapy drugs (Daou, 2020) (Fonseca et al., 2020).  
66 MMP12 is a matrix protein metalloenzyme, also named macrophage metalloenzyme, from a family of  
67 endoproteolytic enzymes whose activities depend on metal ions such as calcium and zinc and can degrade  
68 extracellular matrix. It was discovered in a study of tadpole morphological changes during development  
69 and is necessary for monocyte recruitment, and it is mainly secreted by inflammatory cells such as mon-  
70 ocyte macrophages(Bauters et al., 2013). MMP12 is mainly secreted by M2 macrophages(Han et al.,  
71 2018; Hotary et al.; Lee et al., 2016). Reports have demonstrated that MMP12 can decompose most  
72 extracellular matrix and vascular components, and has obvious effects on elastic fiber-rich blood vessels,  
73 lung, embryonic development, reproduction, and tissue remodeling(Atl1, 2017; Kraen et al., 2019;  
74 Langlois et al.; Wagner et al., 2016; Wang et al., 2019; Wetzl et al.). MMP12 is associated not only with  
75 smoking-induced emphysema(Kraen et al., 2019) but also with the typing of bone marrow cells and  
76 myeloid derived suppressor cells(Qu et al., 2011). As early as 1981, studies reported that MMP12 can  
77 specifically degrade insulin(Kettner et al.). In 2014, researchers of Washington University confirmed  
78 that MMP12 regulates insulin sensitivity and is positively correlated with insulin resistance(Lee et al.,  
79 2016). In 2016, MMP12 was identified as a target for insulin-related treatment of metabolic diseases,  
80 and MMP12 promotes insulin resistance and prevents fat expansion under high-fat conditions(Amor and  
81 Moreno-Viedma; Bauters et al., 2013).  
82 In recent years, some inflammatory cytokines, such as Interleukin 6 (IL-6), monocyte chemoattractant  
83 protein-1, tumor necrosis factor, zinc- $\alpha$ 2-glycoprotein and pancreatic enzymes, have been shown to be  
84 related to muscle loss (Bing, 2011; Han et al., 2018; Pettersen et al., 2017; Talbert et al., 2018a; Yarla et

---

85 al., 2018). IL-6, a multi effect proinflammatory cytokine, is secreted by normal human monocytes, fi-  
86 broblasts, endothelial cells, Th2 cells, vascular endothelial cells. And a variety of tumor cells also secrete  
87 IL-6 (Carson and Baltgalvis, 2010b; Han et al., 2018; Pettersen et al., 2017). It targets macrophages,  
88 hepatocytes, resting T cells, activated B cells and plasma cells (Han et al., 2018; Utsumi et al., 1990).  
89 The IL-6 level has been proposed to be high in patients with skeletal muscle loss (Peixoto da Silva et al.,  
90 2020a). IL-6 levels were increased in tumor tissue and involved in skeletal loss progression in cancer  
91 patient (Narsale et al., 2014). IL-6 can directly induce alternative macrophage activation(Ayaub et al.;  
92 Hopkins et al.). And systemic overexpression of IL-6 accelerates CAC muscle loss in *Apc<sup>Min/+</sup>* mice  
93 (Baltgalvis et al., 2010). A high level of IL-6 in serum is considered to be an important contributor to the  
94 progression of muscular dystrophies, including muscle loss induced by CAC and duchenne muscular  
95 dystrophy. Blocking IL-6 receptor may inhibit dystrophic muscle loss and lipolysis by suppressing the  
96 downstream Janus kinase/signal transducer and transcription activator (JAK/STAT) pathway to promote  
97 muscle regeneration(Hu et al., 2019; Wada et al., 2017). Ville Wallenius et al found that centrally acting  
98 IL-6 exerts anti-obesity effects in rodents but does not increase energy expenditure(Franckhauser et al.,  
99 2008; Wallenius et al., 2002). IL-6 has been shown to induce insulin resistance(Liaqat et al., 2017). It is  
100 well known that insulin affects glucose uptake through the PI3K-AKT-mTOR pathway by binding to  
101 insulin receptors(Hopkins et al.). Skeletal muscle is the primary tissue involved in insulin-stimulated  
102 glucose uptake. IL-6 mediates glucose intolerance and promotes insulin resistance in skeletal muscle  
103 (Deshmukh et al.; Han et al., 2018; Nicholson et al., 2019). Moreover, insulin resistance can promote  
104 muscle wasting(Peixoto da Silva et al., 2020b). IL-6 suppresses insulin action through the Signal trans-  
105 ducer and activator of transcription 3 (STAT3) pathway, which then may affect the insulin receptor by

---

106 suppressing insulin receptor substrate-1 and downstream targets(Puppa et al., 2012). In short, various  
107 studies have proven that IL-6 can induce insulin resistance, thereby indirectly exacerbating muscle loss  
108 in CAC. In our study, we found that IL-6 secreted by tumors would target muscle macrophages, and then  
109 MMP12 in these activated macrophages will be upregulated, degrading insulin and insulin-like growth  
110 factor 1. So, we thought one molecular crosstalk may exist in bearing mice. Increased expression of IL-  
111 6 derived from cancer cells up-regulates MMP12 in macrophages, which affects skeletal glycolipid me-  
112 tabolism over a long period of time, may resulting in loss of skeletal muscle for a long time.

113 To date, for patients with muscle and weight loss induced by CAC, multimodal interventions including  
114 drugs, nutritional support and physical exercise may be a reasonable approach for future research to  
115 better understand and prevent loss of muscle (Fonseca et al., 2020). Although several drugs have had  
116 positive clinical effects in increasing lean body mass, their effects on body function are limited. There  
117 are no effective medical interventions or approved drug therapies that can completely reverse muscle  
118 loss caused by CAC, which brings difficulties to the treatment of chemotherapy drugs (Daou, 2020)  
119 (Fonseca et al., 2020). Taken together, the combination of MMP12 inhibitors and chemotherapy drugs  
120 may bring new challenges and ideas for the treatment of cancer cachexia to improve the quality of life.

121

122

123

124

125

126

---

## 127 2. Materials and Methods

### 128 2. 1 Mice

129 B6.129X-MMP12tm1Sds/J macrophage metalloelastase-deficient (MMP12<sup>-/-</sup>) mice (no. 004855), with  
130 a C57BL/6 background were purchased from the Jackson Laboratory, USA( [https://www.jax.](https://www.jax.org/strain/004855)  
131 [org/strain/004855](https://www.jax.org/strain/004855)). Apc<sup>Min/+</sup> mice (no. T001457) were obtained from Gem Pharmatech, China ( [http:](http://www.gempharmatech.com/cn/index.php/searchinfo/59/17.html)  
132 [//www.gempharmatech.com/cn/index.php/searchinfo/59/17.html](http://www.gempharmatech.com/cn/index.php/searchinfo/59/17.html)). Wild-type (WT/ C57BL/6J) mice  
133 were purchased from Guangdong Medical Laboratory Animal Center (China). The production license  
134 number was SCXK (Guangdong) 2017-0125. Apc<sup>Min/+</sup>; MMP12<sup>-/-</sup> mice were obtained by crossing  
135 Apc<sup>Min/+</sup> mice and MMP12<sup>-/-</sup> mice ([Figure 1-figure Supplement 1A](#)). All mice were housed in specific  
136 pathogen-free conditions. All mice studies complied with the Guangdong Pharmaceutical University,  
137 and all protocol was approved by the animal experimental ethics committee of Guangdong Pharmaceu-  
138 tical University.

### 139 2. 2 Genotype identification

140 We established crossbred mice and genotyped the 3-week-old mice. The polymerase chain reaction prod-  
141 ucts were subjected to gel electrophoresis (1.2%), and a gel imaging system (GboxGyngene system, UK)  
142 was used to obtain electrophoresis images ([Figure 1-figure Supplement 1B](#)). The details of genotype  
143 identification can be found on the website of the Jackson Laboratory <https://www.jax.org/strain/004855>.

### 144 2. 3 Mice experiments and Tissue collection

145 Mice were anesthetized by inhalation of carbon dioxide anesthesia, marrow, blood, epididymal white fat,  
146 gastrocnemius and soleus muscle and brown back fat were collected. For immunohistochemistry Mice  
147 were anesthetized by inhalation of carbon dioxide anesthesia, marrow, blood, epididymal white fat,

---

148 gastrocnemius and soleus muscle and brown back fat were collected. For immunohistochemistry stain-  
149 ing analysis, we obtained muscle tissues wax tissue blocks from clinical surgery patients. For serum  
150 detection, all fresh clinical blood samples were obtained from the Sun Yat-Sen University Cancer Center,  
151 Guangzhou, China. all fresh clinical blood samples were taken individuals undergoing a clinical health  
152 individuals and colorectal cancer patients (30-60 years, excluding individuals with diabetes and hyper-  
153 thyroidism) and frozen at -80°C until the experiments were performed.

#### 154 2. 4 Antibodies and Reagents:

155 An anti-F4/80 anti-body (Cat: 14-4801-81) was purchased from eBioscience and anti-MMP12 (MA5-  
156 24851) were purchased from Thermo Fisher (Thermo Fisher Scientific, Cambridge, Massachusetts,  
157 USA). An anti-GAPDH (5174P) and anti- $\beta$ -actin (4970S) were purchased from Cell Signaling Technol-  
158 ogy Inc (CST). Recombinant mouse MMP-12 protein (3467-MPB-020) was purchased from R&D Sys-  
159 tems, Inc. The MMP12 inhibitor MMP408 (444291) was purchased from Merck Millipore Company.  
160 Alexa Fluor-488 donkey antibody (P/N SA11055S) was purchased from Invitrogen (Thermo Fisher Sci-  
161 entific, Cambridge, Massachusetts, USA).

#### 162 2. 5 Total RNA extraction and Real-time polymerase chain reaction

163 All tissues from mice were quick-frozen in liquid nitrogen and stored at -80°C until they were dissolved  
164 with Trizol (TaKaRa, Guangzhou, China, A161050A). RNA extraction was performed according to the  
165 manufacturer's instruction, and the total extracted RNA was reverse-transcribed into cDNA for polymer-  
166 ase chain reaction amplification using the real-time polymerase chain reaction SYBR Green kit (TaKaRa,  
167 Guangzhou, China). The reverse transcription steps were as follows: denaturation at 94°C for 5 minutes;  
168 40 cycles of denaturation at 94°C for 30 seconds, annealing at 60°C for 30 seconds, and extension at



---

169 72°C for 30 seconds; 72°C for 5 minutes. The mRNA samples were quantified in triplicate. The house-  
170 keeping gene GAPDH was used as an internal control to normalize the real-time polymerase chain reac-  
171 tion data for each sample of mRNA. All real-time polymerase chain reaction primers were synthesized  
172 by Shanghai Sangon Biotechnology Inc., China, and the primer sequences are listed in S [Table 1](#).

### 173 2. 6 Histological analysis and Hematoxylin and eosin staining

174 Formalin-fixed (10% neutral buffered formalin), gradient dehydration and paraffin-embedded to obtain  
175 3- $\mu$ m tissue sections from mice were subjected to perform the experiments of hematoxylin and eosin  
176 staining, immunohistochemical staining and immunofluorescence staining in accordance with the proto-  
177 cols. To assess the cross-sectional area of muscle, image J software was used after hematoxylin and eosin  
178 staining

### 179 2. 7 Immunohistochemistry

180 Tissue sections were dewaxed and incubated with 30% hydrogen peroxide in methanol and blocked with  
181 10% bovine serum albumin diluted with phosphate buffered saline (PBS). The sections were incubated  
182 with primary antibodies against MMP12 (1:100) at 4°C overnight. Finally, the primary antibody-treated  
183 sections were incubated with secondary antibody (1:100) horseradish peroxides (HRP) (goat anti-rabbit  
184 IgG) conjugated with HRP at 37°C for 1hour, stained with 3,3-diaminobenzidine, and counterstained  
185 with hematoxylin.

### 186 2. 8 Double immunofluorescence staining

187 Tissue sections were dewaxed and blocked with 10% bovine serum albumin diluted with PBS. The sec-  
188 tions were incubated with a mixture of primary antibodies against MMP12(1:100) and F4/80 (1:100)  
189 overnight at 4°C. The next day, the primary antibody-treated sections were incubated with mixtures of

---

190 secondary antibodies conjugated Alexa Fluor 488 (1:100) and Alexa Fluor 555 (1:100) for 1 hour at room  
191 temperature. Immunostaining signals and DAPI-stained nuclei were visualized under a confocal micro-  
192 scope.

## 193 2. 9 Enzyme-linked immunosorbent assay

194 The enzyme-linked immunosorbent assay (ELISA) was performed with kits with serum samples from  
195 patients and mice according to the manufacturer's protocol. The human-IL6 kit (EHC007), mouse  
196 JE/MCP1/CCL2 (EMC113) kit, mouse IL-6 ELISA kit (EMC004), and mouse KC/IL-8/CXCL1 ELISA  
197 kit (EMC104) were purchased from NeoBioscience Technology Company (ShenZhen, China). The  
198 rat/mouse insulin kit (EZRMI-13K) was purchased from EMD Millipore Corporation. A mouse MMP12  
199 ELISA kit (ARG81803) was purchased from Arigobiolaboratories company. The human CXCL1/KC kit  
200 (EK-196) was purchased from Multi Science Company. The data of ELISA was analyzed by using Curve  
201 Expert1.4 software.

## 202 2. 10 Western blotting

203 Tissue samples (50-80 mg) or cells were homogenized and lysed with radio immunoprecipitation assay  
204 buffer (Thermo Scientific, 89900) containing with protease and phosphatase inhibitors, and then the su-  
205 pernatants were clarified by centrifugation. Quantitative analysis based on the bicinchoninic acid (BCA)  
206 protein assay was used to detect the protein concentration. Denatured proteins in the supernatant were  
207 separated by sodium dodecyl sulfate–polyacrylamide gel electrophoresis and transferred to polyvinyl-  
208 dene difluoride (Millipore Corporation, Billerica, MA, USA) membranes, blocked with 5% nonfat milk  
209 powder at room temperature, and then incubated with the primary antibodies (1:1000) overnight at 4°C.  
210 The next day, the protein strips were further incubated with HRP-conjugated anti-rabbit secondary

---

211 antibodies (1:5000) and the bands were visualized after exposure to film after incubated with enhanced  
212 chemiluminescence detection reagents. These bands were visualized after exposure to film. We used  
213 imageJ software to analyze the optical density of the protein band. All experiments were repeated three  
214 times.

## 215 2. 11 Cytokine antibody assay

216 Qualitative assessment of 38 cytokines in the supernatants from media for culture (+MC38) or non-cul-  
217 ture with MC38 (-MC38) cells was performed with the Ray Bio Mouse Cytokine Antibody Array 5  
218 (AAM-INF-1-2, Ray Biotech) according to the provided manufacturer's protocol. The detection proce-  
219 dure was as follows: The membranes were blocked by incubation with the blocking buffer. Diluted bio-  
220 tin-conjugated anti-cytokine antibodies and HRP-conjugated streptavidin were detected to immuno-  
221 complexes. The visualized X-ray film was exposed to chemiluminescence for quantification with ECL  
222 chemiluminescence. Semiquantitative data analysis was performed for signal intensity ImageJ, and  
223 positive controls were used to normalize the results. Every cytokine to positive control ratio (cytokine  
224 density/positive control density) is used to represent the relative content of every cytokine. The cyto-  
225 kines and their abbreviations are shown in ([Figure 3-figure Supplement 7](#)).

## 226 2. 12 Oral glucose tolerance test, Insulin tolerance test and Blood glucose level measurement

227 Mice were fasted for 8 hours and then housed overnight. And then, they were given either oral glucose  
228 (2 g/kg body weight or an intraperitoneal insulin injection (0.75 IU/kg). The tail vein blood glucose level  
229 of mice was measured for tail blood glucose at 0, 15, 30, 45, 60, 90, and 120 minutes after treatment.  
230 Blood samples were collected at 0, 15, 30 and 60, 90, and 120 minutes for glucose measurement in tail

---

231 vein blood with a blood glucose meter (Johnson & Johnson) at the specified time points. All blood glu-  
232 cose levels were performed using the glucose meters.

#### 233 2. 13 Serum lipid composition assay

234 The levels of total cholesterol (TC), total triglycerides (TG), high density lipoprotein cholesterol (HDL-  
235 C) and low density lipoprotein cholesterol (LDL-C) were determined according to the manufacturer's  
236 protocols. The assay kits all were purchased from Jiancheng (Nanjing, China).

#### 237 2. 14 Cell culture

238 The RAW264.7 cell line, MC38 cell line and CT26 cell line were purchased from the American Typical  
239 Culture Collection (ATCC) and cultured according to international standard protocols. All cell lines were  
240 maintained in Dulbecco's Modified Eagle's Medium (DMEM, Thermo Scientific HyClone, Beijing,  
241 China) +10% fetal bovine serum (FBS, HyClone) + 1% penicillin (HyClone)/streptomycin (HyClone).  
242 The RAW 264.7 cell line, MC 38 cell line and CT26 cell line were cultured in DMEM. All cell lines in  
243 the experiments were incubated with a mixture of 95% air and 5% CO<sub>2</sub>.

#### 244 2. 15 Co-culture experiment

245 All cells were grown in DMEM+10% FBS+10% penicillin-streptomycin. The co-culture of RAW264.7  
246 and MC38/CT26 cells was seeded into performed using a chamber with filter inserts (pore size, 0.4 μm)  
247 in 6-well dishes (Corning, NY, USA). All cell lines could not pass to the filter because the pore size of  
248 the filter was smaller than the diameter of cell lines. RAW264.7 cells non co-cultured with MC38/CT26  
249 cell lines (-MC38/CT26) were used as the negative controls. MC38/CT26 cell lines (control, 1x10<sup>4</sup>, 3x10<sup>4</sup>,  
250 5x10<sup>4</sup>) were seed in upper chamber, while RAW264.7 cells (1-2x10<sup>5</sup>) were seed in the lower chamber.  
251 We can separate physically RAW264.7 cells or MC38/CT26 cell lines to obtain RAW264.7

---

252 (+MC38/CT26) cells in lower chamber. The RAW264.7 cells were homogenized and lysed with radio  
253 immunoprecipitation assay buffer to quantitative analysis and then subjected to western blotting.

#### 254 2. 16 Interleukin 6 treatment of macrophages

255 The Interleukin 6 (IL-6) freeze-dried powder was purchased from Pepertech (216-16) and was dissolved  
256 in trehalose-bovine serum albumin aqueous solution. RAW264.7 cells ( $1-2 \times 10^5$ ) were seeded into 6-well  
257 plates and treated with increasing different doses of IL-6 (+IL-6, 0, 2, 5, 10, 30 ng/ml) for 72 hours. Next,  
258 RAW264.7 cells ( $1-2 \times 10^5$ ) were treated continuously with IL-6 (+IL-6, 30 ng/ml) for 0, 3, 6, and 9 hours.  
259 Cells incubated with fresh media were used as the untreated (-IL-6) negative controls. Finally, western  
260 blotting was used to quantify MMP12 in RAW264.7 cells under different conditions.

#### 261 2. 18 Isolation of primary peritoneal macrophages

262 24-week-old WT and *Apc<sup>Min/+</sup>* mice were sterilized with 75% ethanol after cervical dislocation. The  
263 mouse abdomen was opened from the peritoneum, and 5 mL fetal bovine serum was injected with a  
264 syringe, which was allowed to remain inside the abdomen for 5 minutes, with gentle massaging for 30 s.  
265 The peritoneal fluid was collected, and this fluid was transferred to a 15 mL sterile tube to obtain perito-  
266 neal macrophages. After centrifugation (4°C, 1000 rpm) for 10 minutes, the supernatant was removed,  
267 and the collected cells were resuspended in Dulbecco's Modified Eagle's Medium. The resuspended cells  
268 were cultured in a petri dish for 2 hours (37°C), and the primary peritoneal macrophages were prepared  
269 from the remaining adherent cells after the medium was removed.

#### 270 2.19 MMP12 and Peptide experiments:

271 Recombinant mouse MMP-12 protein (3467-MPB-020) was purchased from R&D Systems, Inc. Ac-  
272 cording to the instructions, dissolve MMP12 in a buffer containing 50mM Tris, 10 mM CaCl<sub>2</sub>, 150 mM

---

273 NaCl, 0.05% (w/v) Brij-35, 5  $\mu$ M ZnCl<sub>2</sub>, pH 7.5 at a concentration of 250ug/ml. Insulin polypeptide

274 and insulin-like factor polypeptide were synthesized by ChinaPeptides Co., Ltd.

275 The fluorescent peptide sequence:

276 (1) Insulin:5-FAM-NQHLCGSHLVEALYLVCGERGFFYTPK(DabcyI);

277 (2) insulin-like growth factor 1: 5-FAM-GPETLCGAELVDALQFVCGDRGFYFNK(DabcyI). Ac-

278 cording to the instructions, the peptide freeze-dried powder was dissolved in 25% ACN and 75%

279 ddH<sub>2</sub>O solvent at a concentration of 1 mg/ml.

280 The two experiments are as follows: (1) Fluorescence intensity: After mixed incubation of MMP12 and

281 peptide (37°C, 2hours), the fluorescence intensity was measured with a fluorescence microplate reader.

282 (2) MS Analysis Report: After the MMP12 and peptide were mixed and incubated, the lower liquid af-

283 ter being filtered by a 34KD filter is subjected to Electrospray Ionization Mass Spectrometry (IMS) to

284 detect its characteristic peaks. The experimental conditions are: Ion Source: ESI, Capillary (KV):  $\pm$

285 (2500~3000), Desolvation(L/hr):800, Desolvation Temp:450°C, Cone(V): 30~50, Run Time: 1min.

286 2. 20 Mice administration

287 All 17-week-old Apc<sup>Min/+</sup> mice were randomly divided into three groups (five mice in each group). A

288 group of Apc<sup>Min/+</sup> mice were administered intragastric with MMP12 inhibitor (MMP408) at a dose of

289 5mg/kg, and the other group was intraperitoneally administered with 5-FU (30mg/kg) combined with a

290 dose of intragastric administration of MMP408. At the same time, Apc<sup>Min/+</sup> mice injected with normal

291 saline intraperitoneally served as a control group. The body weight was weighed by the administration

292 every 2 days and after this continued for 10 days, the final weight change from the initial body weight

293 was calculated.

---

294 2. 21 Data calculation and Statistical analysis

295 All mouse organ ratios represented the percentage of the organs/tissues weight compared to the body

296 weight. The skeletal muscle to weight ratio was (Gastrocnemius +Soleus muscle)/body (%). All data

297 were processed with GraphPad Prism 8.0 software and are presented as the means  $\pm$  standard deviation

298 (SD). A two-tailed test was used. Statistically significant differences were set at  $*P < 0.05$ ,  $**P < 0.01$ ,

299  $***P < 0.001$ ,  $****P < 0.0001$ . All schematic images were created with BioRender.com.

300

301

302

303

304

305

306

307

308

309

310

311

312

313

314

---

### 315 **3 Results**

#### 316 **3.1 Knockout MMP12 can suppress weight and muscle loss in $Apc^{Min/+}$ mice**

317 To investigate the weight dynamics of the mice, we determined the mouse body weight by retroactive  
318 examination of the body weight from 5-week to 24-weeks old. The current weight curves have shown  
319 that compared with the weight gain in wild type (WT) mice over time, the weight of  $Apc^{Min/+}$  mice  
320 reached its maximum peak at 12-week-old and then declined until to die at approximately 24-week-old  
321 ([Figure 1A](#)). Surprisingly, in comparison to the  $Apc^{Min/+}$  mice control, the body weight of  $Apc^{Min/+};$   
322  $MMP12^{-/-}$  mice increased by approximately 70% at the same age ([Figure 1B](#)). While, there were no sig-  
323 nificant differences between WT mice and  $MMP12^{-/-}$  mice in body weight ([Figure 1C](#)). As well known,  
324 the  $Apc^{Min/+}$  mouse is a model of muscle loss with cancer cachexia (CAC) and intestinal tumor burden.  
325 Because weight loss induced by CAC may be related to the wasting of skeletal muscle weight and fat  
326 weight (Peixoto da Silva et al., 2020a), here, we verified whether the weight gain of  $Apc^{Min/+}$  mice  
327 caused by MMP12 knockout was due to reduction of fat and skeletal muscle loss at 24-week-old CAC  
328 stage in  $Apc^{Min/+}$  mice. We assessed the histologic white adipose tissue (WAT), compared with that in  
329 WT mice, the WAT-to-body weight ratio in  $Apc^{Min/+}$  mice decreased and the weight ratio of  $Apc^{Min/+};$   
330  $MMP12^{-/-}$  mice tended to increase compared with that of  $Apc^{Min/+}$  mice but the increase was not statisti-  
331 cally significant ([Figure 1D](#)). However, a significant increase of approximately 4.5% in the muscle-to-  
332 body weight ratio was observed in  $Apc^{Min/+}; MMP12^{-/-}$  mice compared with  $Apc^{Min/+}$  mice ([Figure 1E](#)).  
333 To further confirm the histological changes of WAT ([Figure 1F](#)) and muscle area ([Figure 1H](#)) in the  
334 four mice group at 24-week-old, we performed hematoxylin and eosin staining to assess the histologi-  
335 cal area by the ImageJ software ([Figure 1F, H](#)). We observed the fat area is larger in  $MMP12^{-/-}$  mice



---

336 compared with WT mice, but there has no difference between  $Apc^{Min/+}$  mice and  $Apc^{Min/+}; MMP12^{-/-}$   
337 mice ([Figure 1G](#)). The H&E staining of muscle to show that the area of  $Apc^{Min/+}; MMP12^{-/-}$  mice is es-  
338 timated to be approximately 1-2-fold larger than  $Apc^{Min/+}$  mice ([Figure 1I](#)). Meanwhile, no difference in  
339 food intake was observed between  $Apc^{Min/+}$  and  $Apc^{Min/+}; MMP12^{-/-}$  mice ([Figure 1-figure Supplement](#)  
340 [3A](#)). Taken together, knocking out MMP12 prevents muscle from wasting in tumor-burden ( $Apc^{Min/+}$ )  
341 mice at CAC stage, but not in WT mice.

### 342 **3. 2 MMP12 is upregulated in muscle tissue and peritoneal macrophages of $Apc^{Min/+}$ mice**

343 To confirm whether MMP12 is expressed in muscle tissue, we use immunohistochemical staining, im-  
344 munofluorescence staining and western immunoblotting to detect the expression of MMP12 in muscle.  
345 The immunohistochemistry results proved that MMP12 positive staining was expressed not only in  
346 skeletal muscles from clinical individuals ([Figure 2A](#), [Figure 2-figure Supplement 3B](#)), but also in WT  
347 mice ([Figure 2B](#)). In order to investigate why the reduction in muscle loss caused by knocking out  
348 MMP12 only occurred after tumor-bearing mice and not in WT mice, furthermore, we used immuno-  
349 histochemistry methods to detect MMP12 expression in muscle from 24-week-old WT mice and  
350  $Apc^{Min/+}$  mice ([Figure 2C](#)). The results of immunohistochemical staining showed that MMP12-positive  
351 staining was increased in the muscle of  $Apc^{Min/+}$  mice compared with that in WT mice at 24-weeks old  
352 by image J ([Figure 2D](#)). Because MMP12 is mainly secreted by macrophages (Lee et al., 2014a; Lee et  
353 al., 2014b), next, we performed double immunofluorescence (IF) to detect the expression of macro-  
354 phages and MMP12 in muscle and found that the F4/80 and MMP12 markers were colocalized in mice  
355 ([Figure 2E](#)). Quantitative PCR (qPCR) revealed that a tendency towards higher MMP12 mRNA levels  
356 in peritoneal macrophages (as described in the Materials) was seen in  $Apc^{Min/+}$  mice ([Figure 2F](#)), which

---

357 was consistent with immunohistochemistry results. We detected the dynamic circulating serum  
358 MMP12 level by enzyme-linked immunosorbent assay and found that the MMP12 levels in 9-, 15-, and  
359 24-week-old WT mice and  $Apc^{Min/+}$  mice did not differ ([Figure 2G](#)). Taken together, MMP12 is ex-  
360 pressed in muscle tissue and co-localized with macrophage. In comparison to the WT mice control,  
361 MMP12 is increased in skeletal muscle tissue and peritoneal macrophages of  $Apc^{Min/+}$  mice, but no dif-  
362 ference in serum was witnessed between the two groups.

### 363 **3. 3 Tumor cells can secrete IL-6**

364 Previous studies have shown that interleukin 6 (IL-6) is one of the cytokines predictive muscle loss in-  
365 duced by CAC (Bonetto et al., 2012; Kim et al., 2013; Mahadik and Sujata, 2013; Mauer et al., 2014), it  
366 can accelerate muscle loss induced by CAC. And tumor cells are an important source of IL-6 (Carson and  
367 Baltgalvis, 2010b; Han et al., 2018; Pettersen et al., 2017). The clinical literature data also suggested that  
368 among many CAC-muscle loss patients who lost weight and were close to death, IL-6 was almost the  
369 only increased cytokine among many factors. Therefore, we mainly focus on whether IL-6, which is  
370 related to muscle loss, is caused by tumors (Carson and Baltgalvis, 2010b). We observed that the clinical  
371 colorectal cancer patients had significantly higher serum IL-6 levels than the normal healthy group ([Fig-  
372 ure 3A](#)). In vivo, a similar trend was found in  $Apc^{Min/+}$  mice, and serum IL-6 levels in  $Apc^{Min/+}$  mice were  
373 significantly increased compared with WT mice at 15-24-week-old ([Figure 3B](#)). We demonstrated that  
374 the IL-6 mRNA levels were higher in intestinal tumors of  $Apc^{Min/+}$  mice than in normal intestinal epithe-  
375 lium of WT mice by qPCR ([Figure 3C](#)). Previous study reported MC38 cells and CT26 cells all can secrete  
376 IL-6 (Li et al., 2018). Therefore, tumor cells can be the source of IL-6. In vitro, we used protein microar-  
377 rays to detect inflammatory factors in the supernatant of mouse colorectal carcinoma MC38 cell lines

---

378 and the results showed that IL-6 expression was higher in the supernatant after cultured with MC-38 cells  
379 ([Figure 3D, E](#)). So, tumor cells can secrete IL-6.

### 380 **3. 4 Tumor-derived IL-6 can upregulate MMP12 in macrophage**

381 Because some previous studies reported that IL-6 may not directly lead to muscle loss in CAC(Carson  
382 and Baltgalvis, 2010a; Franckhauser et al., 2008). IL-6 in the tumor microenvironment may be an im-  
383 portant determinant of alternative macrophage activation and induce macrophage M2 polarization and  
384 M2 macrophages can produce MMP12(Suzuki et al., 2017; Wang et al., 2018). Taken together, we spec-  
385 ulated whether tumors regulate macrophage MMP12 by secreting IL-6 to affect muscle loss. To uncover  
386 the underlying mechanism communication between tumor-derived IL-6 and macrophages, we performed  
387 cell experiments in vitro (as described in the Materials). Mouse macrophage RAW264.7 cells co-cultured  
388 with mouse colorectal cancer MC38 cells (CT 26 cells) for 72hours to detect macrophage MMP12 by  
389 western blotting ([Figure 4A](#)) and the results confirmed that RAW264.7 cells exhibited increased MMP12  
390 expression as the number of MC38 cells increased, with RAW264.7 cells cultured alone as the negative  
391 control group ([Figure 4B, C](#)). Similar trends were observed in CT26 cells ([Figure 4D, E](#)). We further  
392 treated RAW264.7 cells with IL-6 in different methods. RAW264.7 cells were seeded into 6-well plates  
393 and treated with increasing doses of IL-6 (0, 2, 5 10,30ng/ mL) for 72h. Next, RAW264.7 cells were  
394 treated continuously with IL-6 (30 ng/ml) for 0, 3, 6, and 9hours. Cells incubated with fresh media were  
395 used as the untreated negative controls ([Figure 4F](#)). We found that within a certain concentration range  
396 (<30ng/ml), as the IL-6 dose increased, the expression of MMP 12 in RAW264.7 cells also increased  
397 when treated with IL-6 ([Figure 4G, H](#)). Next, the expression of MMP12 in RAW264.7 increased as the  
398 stimulation time prolonged when the RAW264.7 cells treated with IL-6(30ng/ml) ([Figure 4I, J](#)).

---

399 Meanwhile, immune gene data proved that IL-6 receptor (IL-6R) is highly expressed on myeloid cells,  
400 including F480<sup>+</sup> macrophages ([Figure 4K](#)). The previous studies proved that IL-6 can be derived from  
401 MC38 and CT26 tumor cells (Li et al., 2018). Taken together, these findings suggest that tumor-derived  
402 IL-6 can stimulate macrophages and up-regulate MMP12 in macrophages.

### 403 **3. 5 MMP12 can degrade insulin and insulin-like growth factor-1**

404 The present results have proved that tumor-derived IL-6 can up-regulate MMP12 in macrophages.  
405 Knockout of MMP12 can reduce muscle loss in *Apc<sup>Min/+</sup>* mice. Recently, it has been demonstrated that  
406 insulin and insulin-like growth factor 1(IGF-1) have complex anabolic effects and are important regula-  
407 tors of muscle remodeling that can mediate muscle atrophy(Baker Rogers et al., 2020; Dev et al., 2019;  
408 Han et al., 2019; Masi and Patel, 2020; Takayama, 2019). Moreover, Jung-Ting Lee proposed that  
409 MMP12 expression significantly promoted insulin resistance and that insulin may be regulated by resi-  
410 dent macrophages(Lee et al., 2014a). To understand the molecular mechanism underlying muscle loss  
411 by macrophage MMP12, we further examined the relationship between MMP12 and insulin (IGF-1)  
412 which affects muscle loss. Firstly, after the labeled insulin polypeptide is incubated with serum, the ab-  
413 sorbance increases ( $\lambda=488\text{nm}$ ) ([Figure 5A](#)). Because IGF-1 is similar in structure to insulin, further-  
414 more, we verified the relationship between fluorescently labeled insulin (IGF-1) and MMP12, and  
415 measured its fluorescence intensity and characteristic peak changes ([Figure 5B](#)). We found that when  
416 the dose of insulin fluorescent peptide is constant, the more MMP12 protein, the stronger the fluores-  
417 cence intensity. Similar Tendencies were observed in the IGF-1([Figure 5C](#)). The qualitative results of  
418 electrospray ionization mass spectrometry showed that the characteristic peak of insulin fluorescent  
419 peptide ( $m/z = 436.99$ ) disappeared after incubation with MMP12 protein ([Figure 5-figure Supplement](#)

---

420 [2A](#)). When the IGF-1 polypeptide was incubated with MMP12, its characteristic peak ( $m/z = 436.68$ )  
421 disappeared ([Figure 5-figure Supplement 2B](#)). Taken together, MMP12 can indeed degrade insulin and  
422 IGF-1. It seems that the degradation of MMP 12 to IGF-1 is stronger than that of insulin.

### 423 **3.6 MMP12 inhibitor can rescue weight loss of $Apc^{Min/+}$ mice**

424 It is reported that insulin and insulin-like growth factor 1 can indeed affect the muscle loss caused by  
425 cachexia and exacerbate weight loss (Baker Rogers et al., 2020; Dev et al., 2019; Han et al., 2019; Masi  
426 and Patel, 2020; Takayama, 2019). Therefore, we are concerned about whether the inhibition of MMP12  
427 that degrades insulin and insulin-like growth factor 1 affects the weight change of cachexia mice. To  
428 investigate the effect of inhibiting MMP12 on colorectal cancer  $Apc^{Min/+}$  mice, we combined the MMP12  
429 inhibitor (MMP408) and a classic clinical anti-colon cancer drug (5-FU) ([Figure 6A](#)). After 2 weeks of  
430 administration in  $Apc^{Min/+}$  mice, at 17-week-old, the results showed that the weight loss in the MMP12  
431 inhibitor group (+MMP408) only accounted for 5% of the basal body weight and was only one third of  
432 that of the control normal saline group (+Control). There was a significant difference between the two  
433 groups. In the MMP12 inhibitor and anticancer drug combination group (+MMP408+5-FU), the weight  
434 change was decreased by approximately 8% of the basal body weight and was half that of the normal  
435 saline group (+Control). Unfortunately, there were no changes in body weight in the anticancer drug  
436 combination group (+MMP408+5-FU), when compared with the MMP12 inhibitor group alone (+  
437 MMP408) ([Figure 6B](#)). In summary, the above experiments proved that specifically inhibiting MMP12  
438 at the CAC stage of weight loss in  $Apc^{Min/+}$  mice can reduce weight loss.

439

440

---

441 **4 Discussion**

442 Researches on weight loss have received more and more attention in many fields, such as diabetes, ab-  
443 normal thyroid metabolism, weight control, etc, among which, muscle loss caused by malnutrition sim-  
444 ilar to cancer cachexia (CAC) is more worrying. More than four-fifths of patients with CAC die from  
445 extreme loss of body weight and skeletal muscle. Our study suggested that MMP12 plays a new role in  
446 controlling weight and muscle loss and inhibiting MMP12 can reverse the body weight reduction with  
447 CAC. In details, the major findings of our study are as follows: (1) MMP12 promotes weight loss and  
448 accelerates the deterioration of CAC. The loss of weight and muscle induced by CAC was reduced in  
449  $Apc^{Min/+}$  by MMP12 knockout. (2) In vivo, MMP12-positive immunostaining was found in muscle of  
450 human and mice. MMP12 was co-labeled with macrophages in the muscle tissue in situ. Importantly,  
451 MMP12 positive staining was substantially increased in the muscle and peritoneal macrophages from  
452  $Apc^{Min/+}$  mice compared with those from wild type (WT) mice. (3) Clinically, serum interleukin 6 (IL-  
453 6) increased in cancer patients. A similar increasing trend was found in serum and tumor tissues of  
454  $Apc^{Min/+}$  mice compared to those from WT mice. Crucially, IL-6 has been shown to be directly secreted  
455 by MC38 tumor cells. (4) In vitro, we proved that tumor cells have a positive relationship with MMP12  
456 secreted by macrophages. At the cellular level, we found for the first time that macrophages can be  
457 stimulated and regulated by IL-6, and the level of MMP12 in macrophages was up-regulated. (5) Un-  
458 derlying mechanism, MMP12 can degrade insulin and insulin-like growth factor 1. In our study, the  
459 degradation effect of MMP12 on insulin-like growth factor 1 was proved for the first time, and it was  
460 found that the degradation effect of MMP12 was stronger than that of insulin. (6) Inhibiting MMP12  
461 prevent weight loss in  $Apc^{Min/+}$  mice at CAC stage. In summary, the present study uncovered a novel

---

462 mechanism that MMP12 promotes weight and muscle loss. The crosstalk between tumor cells and mac-  
463 rophages is that MMP12 is upregulated by tumor cell-derived IL-6 and MMP12 can degrade insulin  
464 and insulin-like growth factor 1, affecting glycolipid metabolism, resulting in weight loss ([Figure 7](#)).  
465 Weight and muscle loss induced by CAC is main cause of death in cancer patients worldwide. The clin-  
466 ical definition of CAC by Fearon criteria includes the following characteristics: weight loss > 5% or  
467 weight loss > 2% and a BMI < 20 kg/m<sup>2</sup> or sarcopenia(van der Werf et al., 2018). In our study, 15-24-  
468 weeks old *Apc*<sup>Min/+</sup> mice with weight loss > 15%, as well as muscle (gastrocnemius and soleus) loss, and  
469 certain other symptoms such as anemia, were considered as the characteristics of CAC. Our data exhib-  
470 ited that muscle weight and muscle cross-sectional area increased in *Apc*<sup>Min/+</sup>; *MMP12*<sup>-/-</sup> mice compared  
471 with *Apc*<sup>Min/+</sup> mice, which indicating that knocking out MMP12 may suppress the decrease of skeletal  
472 muscle.

473 As a kind of matrix metalloproteinase family, MMP12 is also called macrophage elastase. It was previ-  
474 ously reported that MMP12 can decompose various extracellular matrix components and vascular com-  
475 ponents, and MMP12 is involved in tumor cell invasion and metastasis. In 2014, Lee Jung-Ting had  
476 explored the role of MMP12 in white adipose tissue expansion on high-fat feeding(Jung-Ting et al.,  
477 2014), while the function of MMP12 under the lack of nutrition yielded has not been studied. We firstly  
478 tried to build a model with tumor-bearing environment lacking nutrition in *Apc*<sup>Min/+</sup> mice hybridized with  
479 *MMP12*<sup>-/-</sup> mice. Unexpectedly, under the condition of tumor-bearing mice, knocking out MMP12 caused  
480 a decrease in muscle loss, but not affect white adipose tissue.

481 A mRNA analysis of the data got from The Cancer Genome Atlas (TCGA) for GTEx, Illumina, Bi-  
482 oGPS and SAGE of MMP12 gene in normal human tissues ([Figure 1-figure Supplement 3C](#)). In our

---

483 study, we focus on the liver, muscle and fat tissues. We weighed these mice tissues at 24-weeks old,  
484 and performed histological evaluation using H&E staining. The liver weight has difference between  
485  $Apc^{Min/+}$  mice and  $Apc^{Min/+}; MMP12^{-/-}$  mice ([Figure 1-figure Supplement 4 A](#)), however, H&E staining  
486 showed that knocking out MMP12 had no more histology effect on the WT mice and  $Apc^{Min/+}$  mice  
487 ([Figure 1-figure Supplement 4B](#)). Similarly, knocking out MMP12 in  $Apc^{Min/+}$  mice did not cause  
488 changes in white fat, even though knocking out MMP12 in the wild background can indeed cause white  
489 fat increase and expansion, which in agreement with Lee Jung-Ting, who showed in 2014 that knock-  
490 ing out MMP12 can increase fat expansion when performing high-fat feeding in WT mice(Jung-Ting et  
491 al., 2014). Notably, the ratio of brown adipose tissue-to-body weight decreased in  $Apc^{Min/+}$  mice com-  
492 pared with  $Apc^{Min/+}; MMP12^{-/-}$  mice ([Figure 1-figure Supplement 4C](#)), and the area of brown adipose  
493 tissue in  $MMP12^{-/-}$  mice expansion, and serving the  $Apc^{Min/+}$  mice as the control group, the same ten-  
494 dency showed in  $Apc^{Min/+}; MMP12^{-/-}$  mice ([Figure 1-figure Supplement 4D](#)), suggesting there may be a  
495 tendency to convert to white adipose tissue. However, the reasons have not been extremely explored in  
496 the current research. We hypothesized that MMP12 may play an important role in the conversion of  
497 brown adipose tissue and white adipose tissue. and it may be associated with a CAC energy consump-  
498 tion and even as useful for researcher focusing on weight loss drug. MMP12 is mainly derived from  
499 macrophages. In view of the fact that I have found that knocking out MMP12 can increase muscle  
500 weight and cross-sectional area, we conducted related experiments on whether MMP12 is expressed on  
501 muscles. Studies have shown that MMP12 is existed and co-labeling with macrophages in our study.  
502 Notably, MMP12 levels increase in muscle tissues and peritoneal macrophages not in serum.



---

503 IL-6 is mainly secreted by a variety of immune cells and is also highly expressed in a variety of cancer  
504 cells(Mauer et al., 2015). Our in vitro studies proved that MC38 cell lines can secrete IL-6. Our animal  
505 experiments in vivo confirmed that the serum IL-6 of  $Apc^{Min/+}$  mice was also higher than that of WT  
506 mice at 15 weeks and 24 weeks, which is consistent with the previous study(Baltgalvis et al., 2008). IL-  
507 6 mRNA levels in intestinal tumors are increased compared with normal intestinal epithelial tissue,  
508 which echoes our data with the increased serum IL-6 in clinical tumor patients(Nikiteas et al., 2005). In  
509 short, maybe, the increased IL-6 in the tumor then circulates into the blood. Of course, the cytokines  
510 secreted by MC38 cells also include monocyte chemoattractant protein1(MCP1) and keratinocyte-de-  
511 rived chemokine (KC) which can recruit macrophages(Barcelos et al., 2004; Engin, 2017; Wang et al.,  
512 2011). But unfortunately, our experiments have shown that only increased at mRNA levels of intestinal  
513 tumors in  $Apc^{Min/+}$  mice at CAC stage but serum MCP1 did not change at the CAC stage in  $Apc^{Min/+}$   
514 mice ([Figure 3-figure Supplement 5A, B](#)). There was no difference in serum KC and KC mRNA levels  
515 in late tumors in mice ([Figure 3-figure Supplement 5C, D](#)). Similarly, clinically, serum KC did not dif-  
516 fer between normal healthy individuals and colorectal cancer patients ([Figure 3-figure Supplement 5E](#)).  
517 In summary, we suspected that there may be a possibility that MCP1 and KC can also cooperate with  
518 IL-6 to recruit macrophages, thereby activating alternative macrophages to polarize M2 macrophages,  
519 resulting in MMP12 secretion. The above results suggested that in the period of CAC, the key is that  
520 IL-6 secreted by tumor cells plays a major role(Baltgalvis et al., 2008). In [Table 2](#).  
521 we summarized the research on IL-6 on body weight and muscle loss, which mostly demonstrated that  
522 IL-6 may have indirect effect on body weight and muscle. Especially, Kristen A Baltgalvis pointed out  
523 knocking out IL-6 can reduce muscle consumption in  $Apc^{Min/+}$  mice(Baltgalvis et al., 2008).

---

524 The crosstalk between tumors and inflammatory factors is well known(Talbert et al., 2018b; Zhang et  
525 al., 2008). We use co-culture experiments in MC38 cell lines and CT26 with RAW264.7 cell lines to  
526 demonstrate that macrophage MMP12 increase treatment with IL-6. We speculated that this is caused by  
527 the IL-6 secreted by tumor cells, and we firstly proved that IL-6 can directly upregulate macrophage  
528 MMP12. However, we did not determine whether the IL-6 produced by macrophages acts on macro-  
529 phages themselves. Similarly, we have not explored whether other cytokines secreted by tumors or mac-  
530 rophages themselves play a synergistic or indirect role along with IL-6.

531 In present study, we used fluorescence intensity measurement and ionization mass spectrometry meth-  
532 ods to prove that insulin and IGF-1 can indeed be degraded by MMP12, but the specific sites and  
533 amino acids where insulin and IGF-1 were broken have not been further proved. At the same time, we  
534 could not prove to completely rule out whether MMP12 itself generates characteristic peaks from frac-  
535 ture ([Figure 5-figure Supplement 2A, B](#)).

536 MMP12, as a macrophage matrix metalloproteinase, has been repeatedly reported to degrade insulin  
537 and affect insulin sensitivity. We verified MMP12 can degrade insulin or IGF-1 in vitro, which is con-  
538 sistent with the previous study(Kettner et al.). As the two key hormones in tumor microenvironment,  
539 insulin resistance is correlated with insufficient insulin, lack of insulin receptor, or decreased insulin  
540 sensitivity, which will reduce the uptake of glucose in organs, which suggests that MMP12 is closely  
541 related to glycolipid metabolism, leading to the loss of skeletal muscle and adipose tissue(Baker Rogers  
542 et al., 2020; Dev et al., 2019; Han et al., 2019; Masi and Patel, 2020; Takayama, 2019). The insulin kits  
543 and insulin tolerance test and oral glucose tolerance test results showed that the knocking out MMP12  
544 in  $Apc^{Min/+}$  mice may reduce insulin levels or increase insulin sensitivity, reversing insulin resistance

---

545 ([Figure 5-figure Supplement 6A-H](#)), but is not related to basic function of islets according to H&E  
546 staining and IHC staining ([Figure 5-figure Supplement 4E-H](#)). We tested four blood lipid levels with  
547 the kit, and the results showed that when  $Apc^{Min/+}$  mice were knocked out MMP12, total triglycerides  
548 decreased in the early and middle stages, but high density lipoprotein cholesterol increased in all age  
549 groups, total cholesterol and low density lipoprotein cholesterol not changed across the 4 groups ([Fig-  
550 ure 5-figure Supplement 6I-L](#)). So, does IL-6 regulating MMP12 help restore muscle loss caused by  
551 cachexia? Clinically inhibiting IL-6 may reduce CAC patients with weight loss. However, long-term  
552 treatments with high-dose IL-6 may cause additional side effects, such as exacerbating CAC resulting  
553 in more muscle loss(Wada et al., 2017). After all, IL-6 acts on muscles indirectly. Surprisingly,  
554 MMP12, as the downstream of IL-6, can significantly suppress weight loss when being specifically in-  
555 hibited in mice, although the effect is not more obvious after combined treatment with the classic colo-  
556 rectal cancer chemotherapy drug 5-FU. Clinically, suppressing MMP12 may reduce the possibility of  
557 insulin degradation, suggesting that our findings may as a method to treat directly glucose deficiency,  
558 CAC and complications of CAC. It will not only provide a new direction for reducing the blood glu-  
559 cose and blood lipid levels of cancer patients but also bring new research ideas for the clinical treat-  
560 ment of diabetes caused by insulin deficiency.

561 In summary, our results identified that knocking out MMP12 in  $Apc^{Min/+}$  mice significantly reduced mus-  
562 cle loss caused by CAC. We determined a positive correlation with between tumor-derived IL-6 and  
563 macrophage MMP12 in colorectal cancer. MMP12 can degrade insulin and IGF-1, reversing the insulin  
564 resistance in CAC to regulate tumor glycolipid metabolism. Therefore, MMP12 is a double-edged sword

---

565 for tumor microenvironment, but, inhibiting MMP12 may represent a new potential targeting for the  
566 treatment of clinical patients with weight loss.

567 **Authors' Contributions**

568 Conceptualization: Jiangchao Li, Lijing Wang, Lingbi Jiang

569 Methodology: Jiangchao Li, Lijing Wang, Lingbi Jiang,

570 Software: Lingbi Jiang

571 Validation: Lingbi Jiang, Mingming Yang, Ting Niu

572 Formal analysis: Jiangchao Li, Lingbi Jiang

573 Investigation: Jiangchao Li, Lingbi Jiang,

574 Resources: Zhengyang Li, Lili Wei, Haobin Li, and Ting Niu, Mingzhe Huang, Pinzhu Huang

575 Data curation: Lingbi Jiang, Jiangchao Li

576 Writing – original draft preparation: Lingbi Jiang, Jiangchao Li,

577 Writing – review & editing: Visualization; Jiangchao Li, Lijing Wang, Yan Mei, Rongxin Zhang, Dehuan

578 Xie, Yan Mei

579 Supervision; Jiangchao Li, Lijing Wang,

580 Project administration; Lingbi Jiang and Shihui He, Zhengyang Li, Xiaodong He

581 Funding acquisition: Jiangchao Li, Lijing Wang, Rongxin Zhang. This work was supported by grants

582 from the National Natural Science Foundation of China (Grant ID: 81773118 to Jiangchao Li, 31771578

583 to Lijing Wang and 81872320 to Rongxin Zhang). The funding source involves research design, data

584 collection and interpretation, and now it is decided to submit the work for publication.

585

---

586 **Acknowledgments**

587 We thank technician Dr. Hao Chen for their help in clinical sample collection. We appreciate that Prof.  
588 Ming Li gave us advices for this study. We would also like to thank Jingzhou Xie, Lixun Huang, Yongjia  
589 Zheng, Yiting Zhang, Junwei Ye, Qianhui Ma, Jiena Liu and Xiaoyang Chen for their help with animal  
590 experiments.

591 **Ethics Statement for Human Subjects Research or Animal Experimentation**

592 All mouse experimental protocols were approved by the animal experimental ethics committee of Guang-  
593 dong Pharmaceutical University. The animal ethics approval number was gdpulac2019019. All tests were  
594 carried out with the approval of the Guangdong Medical Laboratory Animal Center, Guangzhou, China.  
595 All experiments for clinical patients in this study were obtained by the approval of the Guangzhou Human  
596 Research Ethics Committee, Provincial First Affiliated Hospital of Guangdong Pharmaceutical Univer-  
597 sity, China. The clinical ethics approval number was EC-AF-019.

598

599

600

601

602

603

604

605

606

---

607 **References**

608 Amor, M., and Moreno-Viedma, V.J.M.M. Identification of Matrix Metalloproteinase-12 as a  
609 Candidate Molecule for Prevention and Treatment of Cardiometabolic Disease. *22*.

610 PMID: [27385318](#)

611 Atli, Ö. (2017). Matrix metalloproteinases are possible targets in monocrotaline-induced  
612 pulmonary hypertension: investigation of anti-remodeling effects of alagebrium and everolimus.

613 *17*, 8-17. PMID: [27182612](#)

614 Ayaub, E.A., Dubey, A., Imani, J., Botelho, F., Kolb, M.R.J., Richards, C.D., and Ask, K.J.S.R.  
615 Overexpression of OSM and IL-6 impacts the polarization of pro-fibrotic macrophages and the

616 development of bleomycin-induced lung fibrosis. *7*, 13281. PMID: [29038604](#)

617 Baker Rogers, J., Syed, K., and Minter, J.F. (2020). Cachexia. In StatPearls (Treasure Island FL: ©

618 2020, StatPearls Publishing LLC.). PMID: [29262118](#)

619 Baltgalvis, K.A., Berger, F.G., Peña, M.M.O., Mark Davis, J., White, J.P., and Carson, J.A. (2010).

620 Activity level, apoptosis, and development of cachexia in Apc(Min/+) mice. *Journal of applied*

621 *physiology* (Bethesda, Md : 1985) *109*, 1155-1161. PMID: [PMC2963323](#)

622 Baltgalvis, K.A., Berger, F.G., Pena, M.M., Davis, J.M., Muga, S.J., and Carson, J.A. (2008).

623 Interleukin-6 and cachexia in ApcMin/+ mice. *Am J Physiol Regul Integr Comp Physiol* *294*,

624 R393-401. DOI: [10.1152/ajpregu.00716.2007](#)

625 Baracos, V.E., Martin, L., Korc, M., Guttridge, D.C., and Fearon, K.C.H. (2018). Cancer-associated

626 cachexia. *Nature Reviews Disease Primers* *4*, 17105. DOI: [10.1038/nrdp.2017.105](#)

627 Barcelos, L.S., Talvani, A., Teixeira, A.S., Cassali, G.D., Andrade, S.P., and Teixeira, M.M. (2004).

628 Production and in vivo effects of chemokines CXCL1-3/KC and CCL2/JE in a model of

629 inflammatory angiogenesis in mice. *Inflammation research : official journal of the European*

630 *Histamine Research Society* [et al] *53*, 576-584. DOI: [10.1007/s00011-004-1299-4](#)

631 Bauters, D., Van Hul, M., and Lijnen, H.R. (2013). Macrophage elastase (MMP-12) in expanding  
632 murine adipose tissue. *Biochimica et Biophysica Acta (BBA) - General Subjects* *1830*, 2954-

633 2959. DOI: [10.1016/j.bbagen.2012.12.024](#)

- 
- 634 Bing, C. (2011). Lipid mobilization in cachexia: mechanisms and mediators. *Current opinion in*  
635 *supportive and palliative care* 5, 356-360. DOI: [10.1097/SPC.0b013e32834bde0e](https://doi.org/10.1097/SPC.0b013e32834bde0e)
- 636 Bonetto, A., Aydogdu, T., Jin, X., Zhang, Z., Zhan, R., Puzis, L., Koniaris, L.G., and Zimmers, T.A.  
637 (2012). JAK/STAT3 pathway inhibition blocks skeletal muscle wasting downstream of IL-6 and in  
638 experimental cancer cachexia. *Am J Physiol Endocrinol Metab* 303, E410-E421.  
639 PMID: [PMC3423125](https://pubmed.ncbi.nlm.nih.gov/223423125/)
- 640 Bonetto, A., Rupert, J.E., Barreto, R., and Zimmers, T.A. (2016). The Colon-26 Carcinoma Tumor-  
641 bearing Mouse as a Model for the Study of Cancer Cachexia. *Journal of visualized experiments* :  
642 *JoVE*, 54893. PMID: [PMC5226332](https://pubmed.ncbi.nlm.nih.gov/266332/)
- 643 Bray, F., Ferlay, J., Soerjomataram, I., Siegel, R.L., Torre, L.A., and Jemal, A. (2018). Global cancer  
644 statistics 2018: GLOBOCAN estimates of incidence and mortality worldwide for 36 cancers in 185  
645 countries. *CA: a cancer journal for clinicians* 68, 394-424. DOI: [10.3322/caac.21492](https://doi.org/10.3322/caac.21492)
- 646 Brody, H. (2015). Colorectal cancer. *Nature* 521, S1. DOI: [10.1038/521S1a](https://doi.org/10.1038/521S1a)
- 647 Carson, J.A., and Baltgalvis, K.A. (2010a). Interleukin 6 as a key regulator of muscle mass during  
648 cachexia. *Exerc Sport Sci Rev* 38, 168-176. DOI: [10.1097/JES.0b013e3181f44f11](https://doi.org/10.1097/JES.0b013e3181f44f11)
- 649 Carson, J.A., and Baltgalvis, K.A. (2010b). Interleukin 6 as a key regulator of muscle mass during  
650 cachexia. *Exerc Sport Sci Rev* 38, 168-176. PMID: [PMC3065300](https://pubmed.ncbi.nlm.nih.gov/2065300/)
- 651 Center, M.M., Jemal, A., Smith, R.A., and Ward, E. (2009). Worldwide variations in colorectal  
652 cancer. *CA: a cancer journal for clinicians* 59, 366-378. DOI: [10.3322/caac.20038](https://doi.org/10.3322/caac.20038)
- 653 Daou, H.N. (2020). Exercise as an anti-inflammatory therapy for cancer cachexia: a focus on  
654 interleukin-6 regulation. *American journal of physiology Regulatory, integrative and comparative*  
655 *physiology* 318, R296-R310. DOI: [10.1152/ajpregu.00147.2019](https://doi.org/10.1152/ajpregu.00147.2019)
- 656 Deshmukh, Biology, A.S.J.H.M., and Investigation, C. Insulin-stimulated glucose uptake in healthy  
657 and insulin-resistant skeletal muscle. DOI: [10.1515/hmbci-2015-0041](https://doi.org/10.1515/hmbci-2015-0041)

- 
- 658 Dev, R., Del Fabbro, E., and Dalal, S. (2019). Endocrinopathies and cancer cachexia. Current  
659 opinion in supportive and palliative care *13*, 286-291. DOI: [10.1097/SPC.0000000000000464](https://doi.org/10.1097/SPC.0000000000000464)
- 660 Engin, A.B. (2017). Adipocyte-Macrophage Cross-Talk in Obesity. Advances in experimental  
661 medicine and biology *960*, 327-343. DOI: [10.1007/978-3-319-48382-5\\_14](https://doi.org/10.1007/978-3-319-48382-5_14)
- 662 Fonseca, G.W.P.D., Farkas, J., Dora, E., Haehling, S.V., and Lainscak, M. (2020). Cancer Cachexia  
663 and Related Metabolic Dysfunction. International journal of molecular sciences  
664 *21*. PMID: [PMC7177950](https://pubmed.ncbi.nlm.nih.gov/327177950/)
- 665 Franckhauser, S., Elias, I., Sopasakis, V.R., Ferre, T., Nagaev, I., Andersson, C.X., Agudo, J., Ruberte,  
666 J., Bosch, F., and Smith, U. (2008). Overexpression of Il6 leads to hyperinsulinaemia, liver  
667 inflammation and reduced body weight in mice. Diabetologia *51*, 1306-1316.  
668 DOI: [10.1007/s00125-008-0998-8](https://doi.org/10.1007/s00125-008-0998-8)
- 669 Han, J., Meng, Q., Shen, L., and Wu, G. (2018). Interleukin-6 induces fat loss in cancer cachexia by  
670 promoting white adipose tissue lipolysis and browning. Lipids Health Dis *17*, 14-14.  
671 PMID: [PMC5771021](https://pubmed.ncbi.nlm.nih.gov/305771021/)
- 672 Han, X., Møller, L.L.V., De Groot, E., Bojsen-Møller, K.N., Davey, J., Henríquez-Olguin, C., Li, Z.,  
673 Knudsen, J.R., Jensen, T.E., Madsbad, S., *et al.* (2019). Mechanisms involved in follistatin-induced  
674 hypertrophy and increased insulin action in skeletal muscle. J Cachexia Sarcopenia Muscle *10*,  
675 1241-1257. PMID: [PMC7663972](https://pubmed.ncbi.nlm.nih.gov/327663972/)
- 676 Herremans, K.M., Riner, A.N., Cameron, M.E., and Trevino, J.G. (2019). The Microbiota and Cancer  
677 Cachexia. International journal of molecular sciences *20*. PMID: [PMC6940781](https://pubmed.ncbi.nlm.nih.gov/326940781/)
- 678 Hopkins, B.D., Chantal, P., Du, X., G., W.D., Xiang, L., David, W., C., A.S., D., G.M., Cindy, H., and  
679 Nature, L.M.R.J. Suppression of insulin feedback enhances the efficacy of PI3K inhibitors.  
680 PMID: [PMC6197057](https://pubmed.ncbi.nlm.nih.gov/326197057/)
- 681 Hotary, K.B., Allen, E.D., Brooks, P.C., Datta, N.S., Long, M.W., and Cell, S.J.W.J. Membrane Type I  
682 Matrix Metalloproteinase Usurps Tumor Growth Control Imposed by the Three-Dimensional  
683 Extracellular Matrix. *114*, 0-45. DOI: [10.1016/s0092-8674\(03\)00513-0](https://doi.org/10.1016/s0092-8674(03)00513-0)



- 
- 684 Hu, W., Ru, Z., Zhou, Y., Xiao, W., Sun, R., Zhang, S., Gao, Y., Li, X., Zhang, X., and Yang, H. (2019).  
685 Lung cancer-derived extracellular vesicles induced myotube atrophy and adipocyte lipolysis via  
686 the extracellular IL-6-mediated STAT3 pathway. *Biochim Biophys Acta Mol Cell Biol Lipids* *1864*,  
687 1091-1102. DOI: [10.1016/j.bbalip.2019.04.006](https://doi.org/10.1016/j.bbalip.2019.04.006)
- 688 Jung-Ting, Lee, Nathalie, Pamir, Ning-Chun, Liu, Elizabeth, A., Kirk, Michelle, M., and Averill  
689 (2014). Macrophage metalloelastase (MMP12) regulates adipose tissue expansion, insulin  
690 sensitivity, and expression of inducible nitric oxide synthase. *Endocrinology*.  
691 PMID: [PMC4138576](https://pubmed.ncbi.nlm.nih.gov/24811111/)
- 692 Kettner, C., Shaw, E., White, R., and Janoff, A.J.B.J. The specificity of macrophage elastase on the  
693 insulin B-chain. *195*, 369-372. PMID: [PMC1162899](https://pubmed.ncbi.nlm.nih.gov/1162899/)
- 694 Kim, T., Choi, S.E., Ha, E.S., Jung, J.G., Han, S.J., Kim, H.J., Kim, D.J., Kang, Y., and Lee, K.W. (2013).  
695 IL-6 induction of TLR-4 gene expression via STAT3 has an effect on insulin resistance in human  
696 skeletal muscle. *Acta Diabetologica* *50*, 189-200. DOI: [10.1007/s00592-011-0259-z](https://doi.org/10.1007/s00592-011-0259-z)
- 697 Kraen, M., Frantz, S., Nihlén, U., Engström, G., Löfdahl, C.G., Wollmer, P., and Dencker, M. (2019).  
698 Matrix Metalloproteinases in COPD and atherosclerosis with emphasis on the effects of smoking.  
699 *PloS one* *14*, e0211987-e0211987. PMID: [PMC6383934](https://pubmed.ncbi.nlm.nih.gov/3183934/)
- 700 Langlois, Stephanie, Wild, Benjamin, Cowan, Kyle, N., St-Pierre, and Marie-Eve Elastase and  
701 matrix metalloproteinase activities are associated with pulmonary vascular disease in the nitrofen  
702 rat model of congenital diaphragmatic hernia. DOI: [10.1016/j.jpedsurg.2017.01.010](https://doi.org/10.1016/j.jpedsurg.2017.01.010)
- 703 Lee, J.-T., Pamir, N., Liu, N.-C., Kirk, E.A., Averill, M.M., Becker, L., Larson, I., Hagman, D.K., Foster-  
704 Schubert, K.E., van Yserloo, B., *et al.* (2014a). Macrophage metalloelastase (MMP12) regulates  
705 adipose tissue expansion, insulin sensitivity, and expression of inducible nitric oxide synthase.  
706 *Endocrinology* *155*, 3409-3420. DOI: [10.1210/en.2014-1037](https://doi.org/10.1210/en.2014-1037)
- 707 Lee, J.T., Pamir, N., Liu, N.C., Kirk, E.A., Averill, M.M., Becker, L., Larson, I., Hagman, D.K.,  
708 Fosterschubert, K.E., and Van Yserloo, B. (2014b). Macrophage Metalloelastase (MMP12)  
709 Regulates Adipose Tissue Expansion, Insulin Sensitivity, and Expression of Inducible Nitric Oxide  
710 Synthase. *Endocrinology* *155*, 3409-3420. PMID: [PMC4138576](https://pubmed.ncbi.nlm.nih.gov/24811111/)

- 
- 711 Lee, J.T., Pamir, N., Liu, N.C., Kirk, E.A., Averill, M.M., Becker, L., Larson, I., Hagman, D.K.,  
712 Fosterschubert, K.E., and Yserloo, B.V. (2016). Macrophage metalloelastase (MMP12) regulates  
713 adipose tissue expansion, insulin sensitivity, and expression of inducible nitric oxide synthase.  
714 *155*, 3409-3420. PMID: [PMC4138576](#)
- 715 Li, J., Xu, J., Yan, X., Jin, K., and Zhang, R. (2018). Targeting Interleukin-6 (IL-6) Sensitizes Anti-  
716 PD-L1 Treatment in a Colorectal Cancer Preclinical Model. *Medical ence Monitor International*  
717 *Medical Journal of Experimental & Clinical Research* *24*, 5501-5508. PMID: [PMC6097097](#)
- 718 Liaqat, A., Rehman, K., Rasul, A., and Akash, M.S.H.J.C.R.E.G.E. (2017). Role of Interleukin-6 in  
719 Development of Insulin Resistance and Type 2 Diabetes Mellitus. *27*. DOI: [10.1615/CritRe-](#)  
720 [vEukaryotGeneExpr.2017019712](#)
- 721 Lin, J.S., Piper, M.A., Perdue, L.A., Rutter, C.M., Webber, E.M., O'Connor, E., Smith, N., and  
722 Whitlock, E.P. (2016). Screening for Colorectal Cancer: Updated Evidence Report and Systematic  
723 Review for the US Preventive Services Task Force. *Jama* *315*, 2576-2594.  
724 DOI: [10.1001/jama.2016.3332](#)
- 725 Lobato, B., Prado, and Qian (2018). Anti-cytokines in the treatment of cancer cachexia. *Annals of*  
726 *palliative medicine*. DOI: [10.21037/apm.2018.07.06](#)
- 727 Mahadik, and Sujata, R. (2013). Association between inflammatory cytokines and insulin resistance  
728 in Indian hypertensive patients. *Journal of Indian College of Cardiology* *3*, 163-168. DOI:  
729 [10.1016/j.jicc.2013.06.003](#)
- 730 Masi, T., and Patel, B.M. (2020). Altered glucose metabolism and insulin resistance in cancer -  
731 induced cachexia: a sweet poison. *Pharmacological reports : PR*. DOI: [10.1007/s43440-020-](#)  
732 [00179-y](#)
- 733 Mauer, J., Chaurasia, B., Goldau, J., Vogt, M.C., Ruud, J., Nguyen, K.D., Theurich, S., Hausen, A.C.,  
734 Schmitz, J., Brönneke, H.S., *et al.* (2014). Signaling by IL-6 promotes alternative activation of  
735 macrophages to limit endotoxemia and obesity-associated resistance to insulin. *Nat Immunol*  
736 *15*, 423-430. PMID: [PMC4161471](#)

- 
- 737 Mauer, J., Denson, J.L., and Brüning, J.C. (2015). Versatile functions for IL-6 in metabolism and  
738 cancer. *Trends in Immunology* *36*, 92-101. DOI: [10.1016/j.it.2014.12.008](https://doi.org/10.1016/j.it.2014.12.008)
- 739 Narsale, A.A., Carson, J.A.J.C.O.i.S., and Care, P. (2014). Role of interleukin-6 in cachexia:  
740 therapeutic implications. *8*, 321-327. PMID: [PMC4323347](https://pubmed.ncbi.nlm.nih.gov/24323347/)
- 741 Nicholson, T., Church, C., Tsintzas, K., Jones, R., Breen, L., Davis, E.T., Baker, D.J., and Jones, S.W.  
742 (2019). Vaspin promotes insulin sensitivity of elderly muscle and is upregulated in obesity. *J*  
743 *Endocrinol.* DOI: [10.1530/JOE-18-0528](https://doi.org/10.1530/JOE-18-0528)
- 744 Nikiteas, N.I., Tzanakis, N., Gazouli, M., Rallis, G., Daniilidis, K., Theodoropoulos, G., Kostakis, A.,  
745 and Peros, G. (2005). Serum IL-6, TNF $\alpha$  and CRP levels in Greek colorectal cancer patients:  
746 Prognostic implications. *World Journal of Gastroenterology* *11*, 1639-1643.  
747 PMID: [PMC4305945](https://pubmed.ncbi.nlm.nih.gov/16391643/)
- 748 Patel, H.J., and Patel, B.M. (2017). TNF- $\alpha$  and cancer cachexia: Molecular insights and clinical  
749 implications. *Life Sciences* *170*, 56-63. DOI: [10.1016/j.lfs.2016.11.033](https://doi.org/10.1016/j.lfs.2016.11.033)
- 750 Peixoto da Silva, S., Santos, J.M.O., Costa E Silva, M.P., Gil da Costa, R.M., and Medeiros, R.  
751 (2020a). Cancer cachexia and its pathophysiology: links with sarcopenia, anorexia and asthenia.  
752 *Journal of cachexia, sarcopenia and muscle* *11*, 619-635. DOI: [10.1002/jcsm.12528](https://doi.org/10.1002/jcsm.12528)
- 753 Peixoto da Silva, S., Santos, J.M.O., Costa, E.S.M.P., Gil da Costa, R.M., and Medeiros, R. (2020b).  
754 Cancer cachexia and its pathophysiology: links with sarcopenia, anorexia and asthenia. *J*  
755 *Cachexia Sarcopenia Muscle*. PMID: [PMC7296264](https://pubmed.ncbi.nlm.nih.gov/330296264/)
- 756 Pettersen, K., Andersen, S., Degen, S., Tadini, V., Grosjean, J., Hatakeyama, S., Tesfahun, A.N.,  
757 Moestue, S., Kim, J., Nonstad, U., *et al.* (2017). Cancer cachexia associates with a systemic  
758 autophagy-inducing activity mimicked by cancer cell-derived IL-6 trans-signaling. *Sci Rep* *7*,  
759 2046-2046. PMID: [PMC5435723](https://pubmed.ncbi.nlm.nih.gov/285435723/)

- 
- 760 Puppa, M.J., White, J.P., Velázquez, K.T., Baltgalvis, K.A., Sato, S., Baynes, J.W., Carson,  
761 J.A.J.J.o.C.S., and Muscle (2012). The effect of exercise on IL-6-induced cachexia in the ApcMin/+  
762 mouse. *3*, 117-137. PMID: [PMC3431229](#)
- 763 Qu, P., Yan, C., and Du, H. (2011). Matrix metalloproteinase 12 overexpression in myeloid lineage  
764 cells plays a key role in modulating myelopoiesis, immune suppression, and lung tumorigenesis.  
765 *Blood* *117*, 4476-4489. PMID: [PMC3099569](#)
- 766 Siegel, R., Desantis, C., and Jemal, A. (2014). Colorectal cancer statistics, 2014. *CA: a cancer*  
767 *journal for clinicians* *64*, 104-117. DOI: [10.3322/caac.21220](#)
- 768 Song, W., Kir, S., Hong, S., Hu, Y., Wang, X., Binari, R., Tang, H.-W., Chung, V., Banks, A.S.,  
769 Spiegelman, B., *et al.* (2019). Tumor-Derived Ligands Trigger Tumor Growth and Host Wasting  
770 via Differential MEK Activation. *Developmental Cell* *48*, 277-286.e276. PMID: [PMC6368352](#)
- 771 Suzuki, K., Meguro, K., Nakagomi, D., and Nakajima, H. (2017). Roles of alternatively activated M2  
772 macrophages in allergic contact dermatitis. *Allergy international : official journal of the*  
773 *Japanese Society of Allergology* *66*, 392-397. DOI: [10.1016/j.alit.2017.02.015](#)
- 774 Takayama, K. (2019). [Overview of Cancer-Associated Cachexia]. *Gan to kagaku ryoho Cancer &*  
775 *chemotherapy* *46*, 1814-1817. PMID: [31879394](#)
- 776 Talbert, E.E., Lewis, H.L., Farren, M.R., Ramsey, M.L., Chakedis, J.M., Rajasekera, P., Haverick, E.,  
777 Sarna, A., Bloomston, M., Pawlik, T.M., *et al.* (2018a). Circulating monocyte chemoattractant  
778 protein-1 (MCP-1) is associated with cachexia in treatment-naïve pancreatic cancer patients.  
779 *Journal of cachexia, sarcopenia and muscle* *9*, 358-368. DOI: [10.1002/jcsm.12251](#)
- 780 Talbert, E.E., Lewis, H.L., Farren, M.R., Ramsey, M.L., Chakedis, J.M., Rajasekera, P., Haverick, E.,  
781 Sarna, A., Bloomston, M., Pawlik, T.M., *et al.* (2018b). Circulating monocyte chemoattractant  
782 protein-1 (MCP-1) is associated with cachexia in treatment-naïve pancreatic cancer patients. *J*  
783 *Cachexia Sarcopenia Muscle* *9*, 358-368. DOI: [10.1002/jcsm.12251](#)
- 784 Tisdale, and Michael, J. (2002). Cachexia in cancer patients. *Nature Reviews Cancer* *2*, 862-  
785 871. [1441 Accesses](#)

- 
- 786 Utsumi, K., Takai, Y., Tada, T., Ohzeki, S., and Hamaoka, T.J.J.o.I. (1990). Enhanced production of  
787 IL-6 in tumor-bearing mice and determination of cells responsible for its augmented production.  
788 *145*, 397-403. PMID: [1972720](#):
- 789 van der Werf, A., van Bokhorst, Q.N.E., de van der Schueren, M.A.E., Verheul, H.M.W., and  
790 Langius, J.A.E. (2018). Cancer Cachexia: Identification by Clinical Assessment versus International  
791 Consensus Criteria in Patients with Metastatic Colorectal Cancer. *Nutrition and cancer* *70*, 1322-  
792 1329. DOI: [10.1080/01635581.2018.1504092](#)
- 793 Wada, E., Tanihata, J., Iwamura, A., Takeda, S., Hayashi, Y.K., and Matsuda, R. (2017). Treatment  
794 with the anti-IL-6 receptor antibody attenuates muscular dystrophy via promoting skeletal  
795 muscle regeneration in dystrophin-/utrophin-deficient mice. *Skelet Muscle* *7*, 23.  
796 PMID: [PMC5660454](#)
- 797 Wagner, C.J., Schultz, C., and Mall, M.A. (2016). Neutrophil elastase and matrix metalloproteinase  
798 12 in cystic fibrosis lung disease. *Molecular and cellular pediatrics* *3*, 25-25.  
799 PMID: [PMC4960106](#)
- 800 Wallenius, V., Wallenius, K., Ahrén, B., Rudling, M., Carlsten, H., Dickson, S.L., Ohlsson, C., and  
801 Jansson, J.-O. (2002). Interleukin-6-deficient mice develop mature-onset obesity. *Nature*  
802 *Medicine* *8*, 75-79. DOI: [10.1038/nm0102-75](#)
- 803 Wang, J., An, F., Cao, Y., Gao, H., Sun, M., Ma, C., Wu, H., Zhang, B., Liu, W., and Wang, J. (2019).  
804 Association of TIMP4 gene variants with steroid-induced osteonecrosis of the femoral head in  
805 the population of northern China. *PeerJ* *7*, e6270-e6270. PMID: [PMC6348097](#)
- 806 Wang, M., Spinetti, G., Monticone, R.E., Zhang, J., Wu, J., Jiang, L., Khazan, B., Telljohann, R., and  
807 Lakatta, E.G. (2011). A local proinflammatory signalling loop facilitates adverse age-associated  
808 arterial remodeling. *PLoS One* *6*, e16653. PMID: [PMC3035650](#)
- 809 Wang, Q., He, Z., Huang, M., Liu, T., Wang, Y., Xu, H., Duan, H., Ma, P., Zhang, L., and Zamvil, S.S.  
810 (2018). Vascular niche IL-6 induces alternative macrophage activation in glioblastoma through  
811 HIF-2 $\alpha$ . *Nature Communications* *9*, 559. PMID: [PMC5805734](#)

- 
- 812 Wetzl, V., Tiede, S.L., Faerber, L., Weissmann, N., Schermuly, R.T., Ghofrani, H.A., and Gall, H.J.L.  
813 Plasma MMP2/TIMP4 Ratio at Follow-up Assessment Predicts Disease Progression of Idiopathic  
814 Pulmonary Arterial Hypertension. DOI: [10.1007/s00408-017-0014-5](https://doi.org/10.1007/s00408-017-0014-5)
- 815 Yang, J., Cao, R.Y., Li, Q., and Zhu, F. (2018). Muscle Atrophy in Cancer. *Advances in experimental*  
816 *medicine and biology* *1088*, 329-346. DOI: [10.1007/978-981-13-1435-3\\_15](https://doi.org/10.1007/978-981-13-1435-3_15)
- 817 Yang, Q., Yan, C., Wang, X., and Gong, Z. (2019). Leptin induces muscle wasting in a zebrafish  
818 *kras*-driven hepatocellular carcinoma (HCC) model. *Disease models & mechanisms* *12*,  
819 *dmm038240*. PMID: [PMC6398506](https://pubmed.ncbi.nlm.nih.gov/3138506/)
- 820 Yarla, N.S., Polito, A., and Peluso, I. (2018). Effects of Olive Oil on TNF- $\alpha$  and IL-6 in Humans:  
821 Implication in Obesity and Frailty. *Endocrine, metabolic & immune disorders drug targets* *18*, 63-  
822 74. DOI: [10.2174/1871530317666171120150329](https://doi.org/10.2174/1871530317666171120150329)
- 823 Yuan, L., Han, J., Meng, Q., Xi, Q., Zhuang, Q., Jiang, Y., Han, Y., Zhang, B., Fang, J., and Wu, G.  
824 (2015). Muscle-specific E3 ubiquitin ligases are involved in muscle atrophy of cancer cachexia: an  
825 *in vitro* and *in vivo* study. *Oncology reports* *33*, 2261-2268. DOI: [10.3892/or.2015.3845](https://doi.org/10.3892/or.2015.3845)
- 826 Zhang, Y., Wang, S., Li, Y., Xiao, Z., Hu, Z., and Zhang, J. (2008). Sophocarpine and matrine inhibit  
827 the production of TNF- $\alpha$  and IL-6 in murine macrophages and prevent cachexia-related  
828 symptoms induced by colon26 adenocarcinoma in mice. *International immunopharmacology* *8*,  
829 1767-1772. DOI: [10.1016/j.intimp.2008.08.008](https://doi.org/10.1016/j.intimp.2008.08.008)
- 830  
831  
832  
833  
834  
835  
836

837 **Figure legends**

**Figure 1**

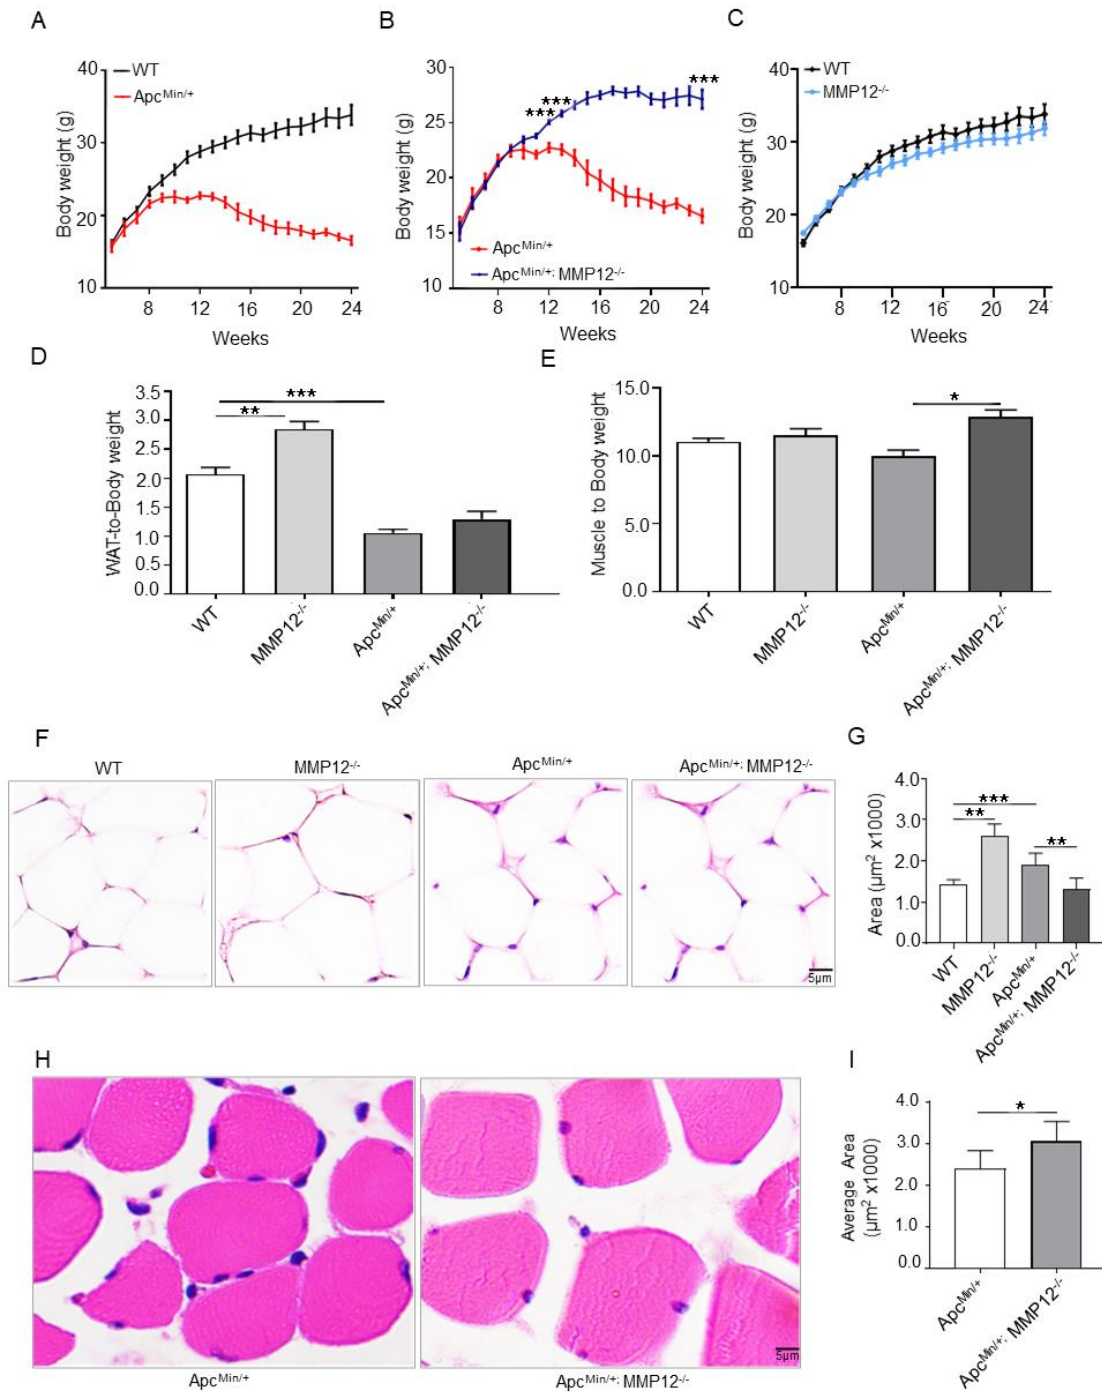

838

839

840

---

841 **Figure 1. Knockout of MMP12 in  $Apc^{Min/+}$  mice prevents weight and muscle loss**

842 (A-C) Plots of the body weight of wild-type (WT),  $Apc^{Min/+}$ ,  $Apc^{Min/+}; MMP12^{-/-}$  and  $MMP12^{-/-}$  mice from  
843 5 to 24 weeks ( $***P < 0.001$ ;  $**P < 0.01$ ;  $*P < 0.05$ ; data are shown as the means  $\pm$  SD; n = 6 per group).  
844 (D) The ratio of white adipose tissue to body weight ( $***P < 0.001$ ;  $**P < 0.01$ , n=5). (E) The ratio of  
845 skeletal muscle to body weight ( $*P < 0.05$ , n=5). (F) Hematoxylin and eosin staining of white adipose  
846 tissue in WT,  $Apc^{Min/+}$ ,  $Apc^{Min/+}; MMP12^{-/-}$  and  $MMP12^{-/-}$  mice at 24 weeks of age. Scale bars, 5 $\mu$ m. (G)  
847 Evaluation of the white adipose tissue across 4 groups by ImageJ software(40X) ( $***P < 0.001$ ;  $**P <$   
848  $0.01$ , data are shown as the means  $\pm$  SD; n = 5 mice each group). (H) Hematoxylin and eosin staining of  
849 muscle in  $Apc^{Min/+}$ ,  $Apc^{Min/+}; MMP12^{-/-}$  at 24 weeks of age. Scale bars, 5 $\mu$ m. (I) Evaluation of the cross-  
850 sectional area of the gastrocnemius from  $Apc^{Min/+}$  mice and  $Apc^{Min/+}; MMP12^{-/-}$  mice by ImageJ software  
851 (40X) ( $*P < 0.05$ ; data are shown as the means  $\pm$  SD; n = 3 mice each group).



Figure 2

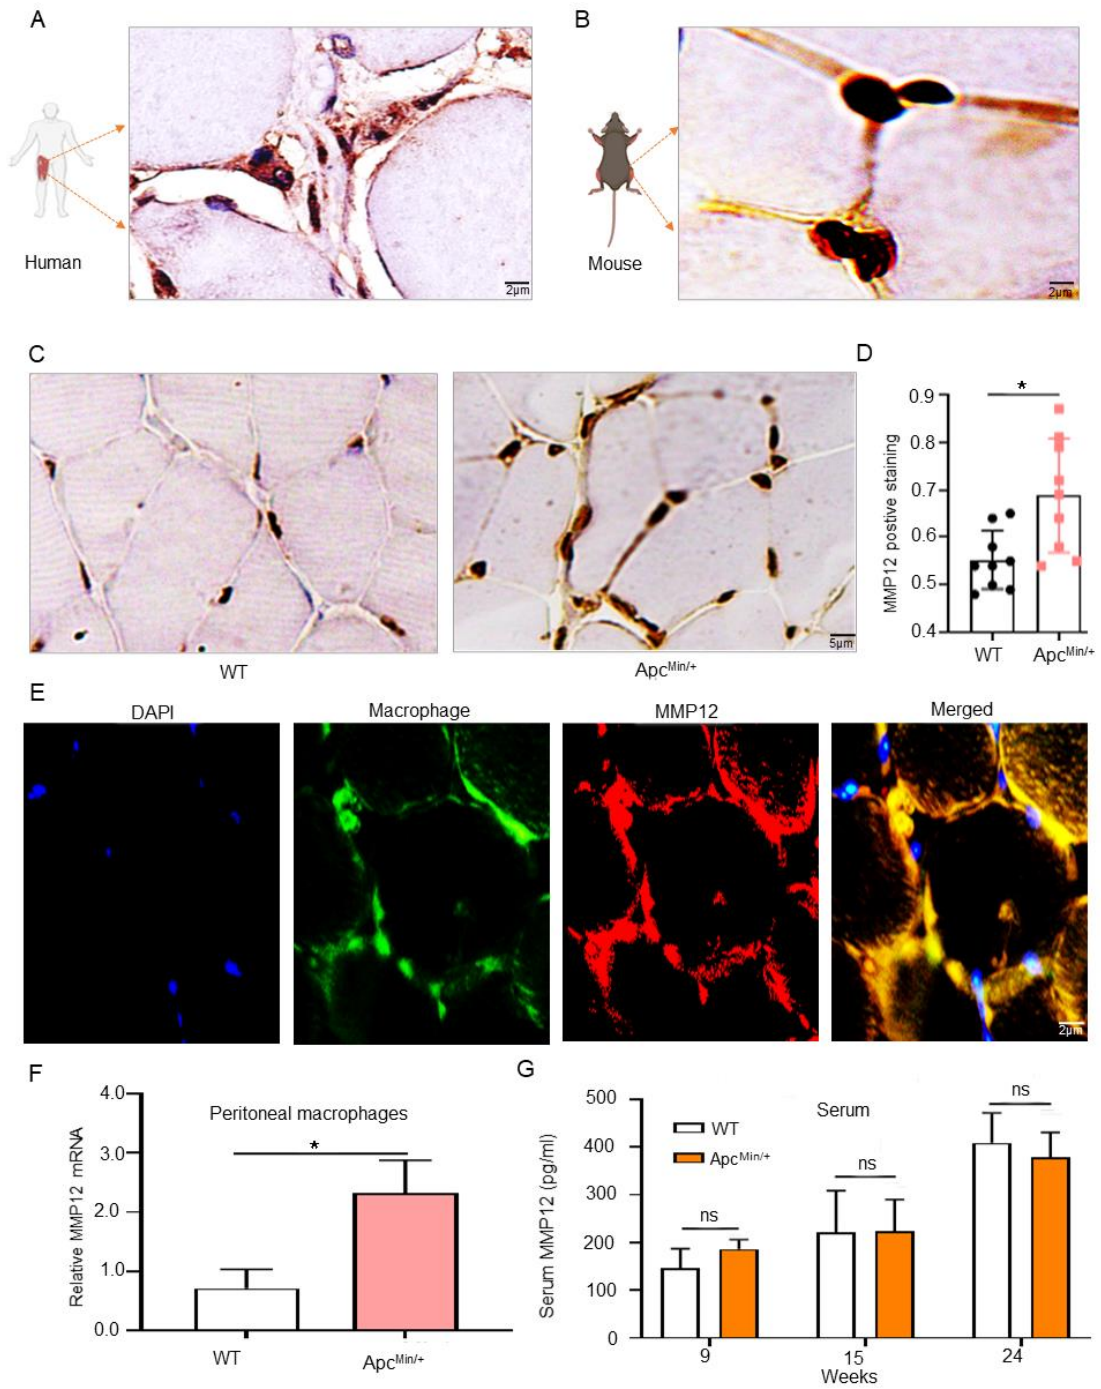

852

853

854

855

---

856 **Figure 2. MMP12 was upregulated in muscle tissues and macrophages of *Apc<sup>Min/+</sup>* mice**

857 (A) Immunostaining of MMP12-positive in muscle of clinical individuals and WT mice. Scale bar, 2 $\mu$ m.  
858 (B) Immunostaining of MMP12-positive in muscle tissue of WT mice. Scale bar, 2 $\mu$ m (C) Immunostain-  
859 ing of MMP12-positive in muscle (gastrocnemius) from WT mice and *Apc<sup>Min/+</sup>* mice at 24 weeks of age.  
860 Scale bar, 5 $\mu$ m. (D) Quantification of MMP12-positive in gastrocnemius tissues was performed by ImageJ  
861 software (40X) (\* $P < 0.05$ , data are shown as the means  $\pm$  SD;  $n = 4$  per group). (E) Representative  
862 images of double immunofluorescent staining of macrophages (F4/80 in green) and MMP12 (in red) in  
863 WT mice are shown. The yellow areas in the merged images indicate overlapping localization of the red  
864 and green signals, indicated by the white arrows. Scale bars, 2 $\mu$ m. (F) Quantification of MMP12 mRNA  
865 expression level in peritoneal macrophages isolated from WT mice and *Apc<sup>Min/+</sup>* mice by qPCR (\* $P <$   
866  $0.05$ ; data are shown as the means  $\pm$  SD;  $n = 3$  per group). (G) The serum MMP12 levels detected in WT  
867 and *Apc<sup>Min/+</sup>* mice at 9-, 15-, and 24 weeks by enzyme-linked immunosorbent assay ( $P > 0.05$ ; data are  
868 shown as the means  $\pm$  SD;  $n = 6$  per group).

Figure 3

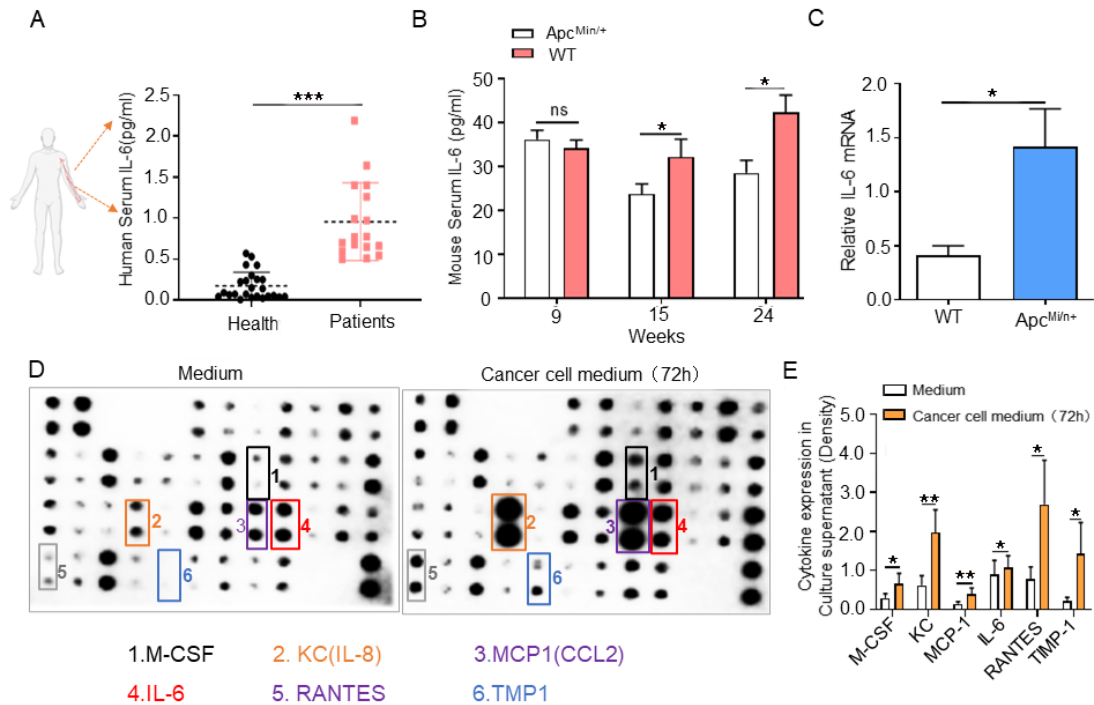

869

870 **Figure 3. Tumor cells can secrete interleukin 6**

871 (A) Serum interleukin 6 (IL-6) levels in normal individuals and patients with colorectal cancer aged 30-

872 50 years detected by enzyme-linked immunosorbent assay (\*\*P < 0.01; data are shown as the means ±

873 SD; n = 26 per group). (B) The IL-6 levels in serum in WT mice and Apc<sup>Min/+</sup> mice were detected at 9-,

874 15-, and 24 weeks old by enzyme-linked immunosorbent assay (\*P < 0.05; data are shown as the means

875 ± SD; n = 5 per group). (C) IL-6 mRNA expression was validated in normal intestinal epithelium isolated

876 from Apc<sup>Min/+</sup> mice versus that in intestinal tumors isolated from WT mice by qPCR (\*P < 0.05; data are

877 shown as the means ± SD; n = 4 per group). (D) Cytokine array detects inflammatory cytokines in fresh

878 untreated medium (-MC38 cells) and cultured MC-38 cells (+MC38 cells); arrows indicate the signifi-

879 cantly increased cytokines. (E) The relative quantification of the significantly upregulated cytokine to

880 positive quality control density ratio by ImageJ software. The positive quality control density was deter-

881 mined for normalization purposes (\*\*P < 0.01, \*P < 0.05; data are shown as the means ± SD).

Figure 4

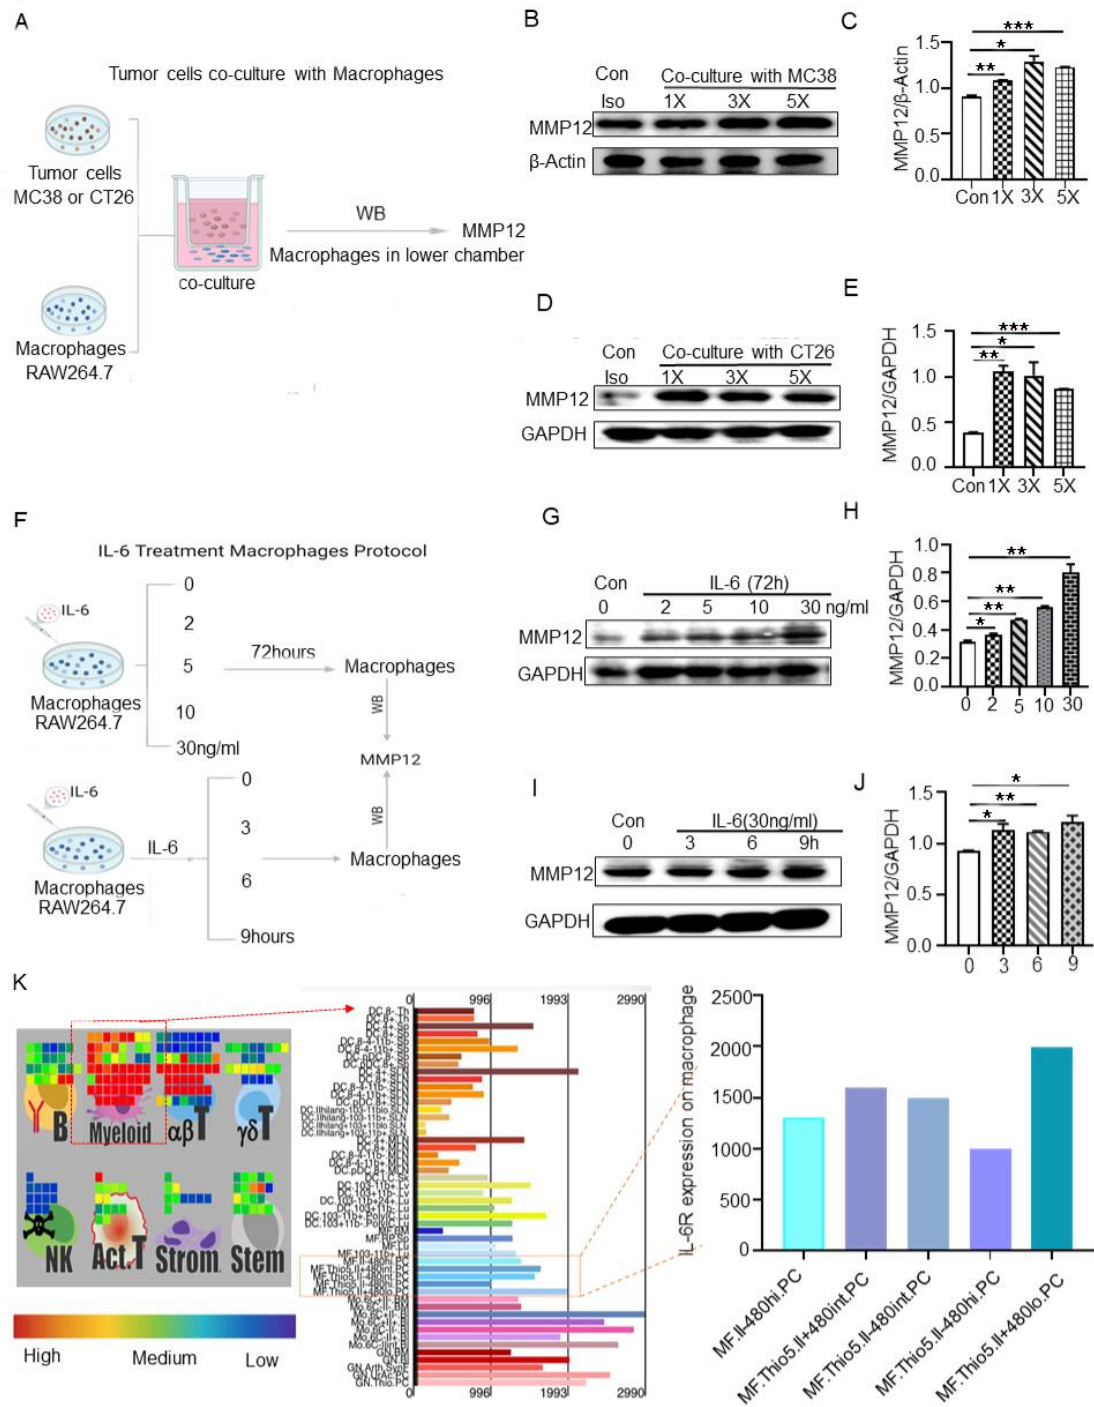

882

883

884

885

---

886 **Figure 4. Tumor-derived IL-6 can upregulate MMP12 in macrophages.**

887 (A) Schematic diagram of tumor cells (MC38/CT26 cell lines) coculture with macrophage cells  
888 (RAW264.7 cell lines). All quantifications use image J software grayscale statistics. (B, C) Representa-  
889 tive western blots showing the secreted MMP12 protein levels from RAW264.7 cell lines ( $1-2 \times 10^5$ ) cul-  
890 tured alone or cocultured with MC38 cell lines (control,  $1 \times 10^4$ ,  $3 \times 10^4$ ,  $5 \times 10^4$ ).  $\beta$ -Actin was used as the  
891 internal control for normalization purposes. (D, E) Representative western blots showing the secreted  
892 MMP12 protein levels from RAW264.7 cell lines ( $1-2 \times 10^5$ ) cultured alone or cocultured with CT26 cell  
893 lines (control,  $1 \times 10^4$ ,  $3 \times 10^4$ ,  $5 \times 10^4$ ). GAPDH was used as the internal control for normalization purposes.  
894 (F) Schematic diagram of IL-6 treated macrophages. RAW264.7 cells incubated with fresh media were  
895 served as untreated negative controls. Using western blotting to detect MMP12 in RAW 264.7 cells and  
896 GAPDH was used as the internal control. (G, H) RAW264.7 cells ( $1-2 \times 10^5$ ) were seeded into 6-well  
897 plates and treated with increasing doses of IL-6 (0, 2, 5, 10, 30 ng/mL) for 72 hours. (I, J) RAW264.7 cells  
898 ( $1-2 \times 10^5$ ) were treated continuously with IL-6 (30 ng/ml) for 0, 3, 6, and 9 hours. (K) Immune gene data  
899 proved that IL-6 receptor is expressed on myeloid cells and the red box represents F480<sup>+</sup> macrophages.  
900 The colored bars refer to the expression level of IL-6 receptors on macrophages. Red represents high  
901 expression of IL-6 receptors, and green represents low expression of IL-6 receptors.

Figure 5

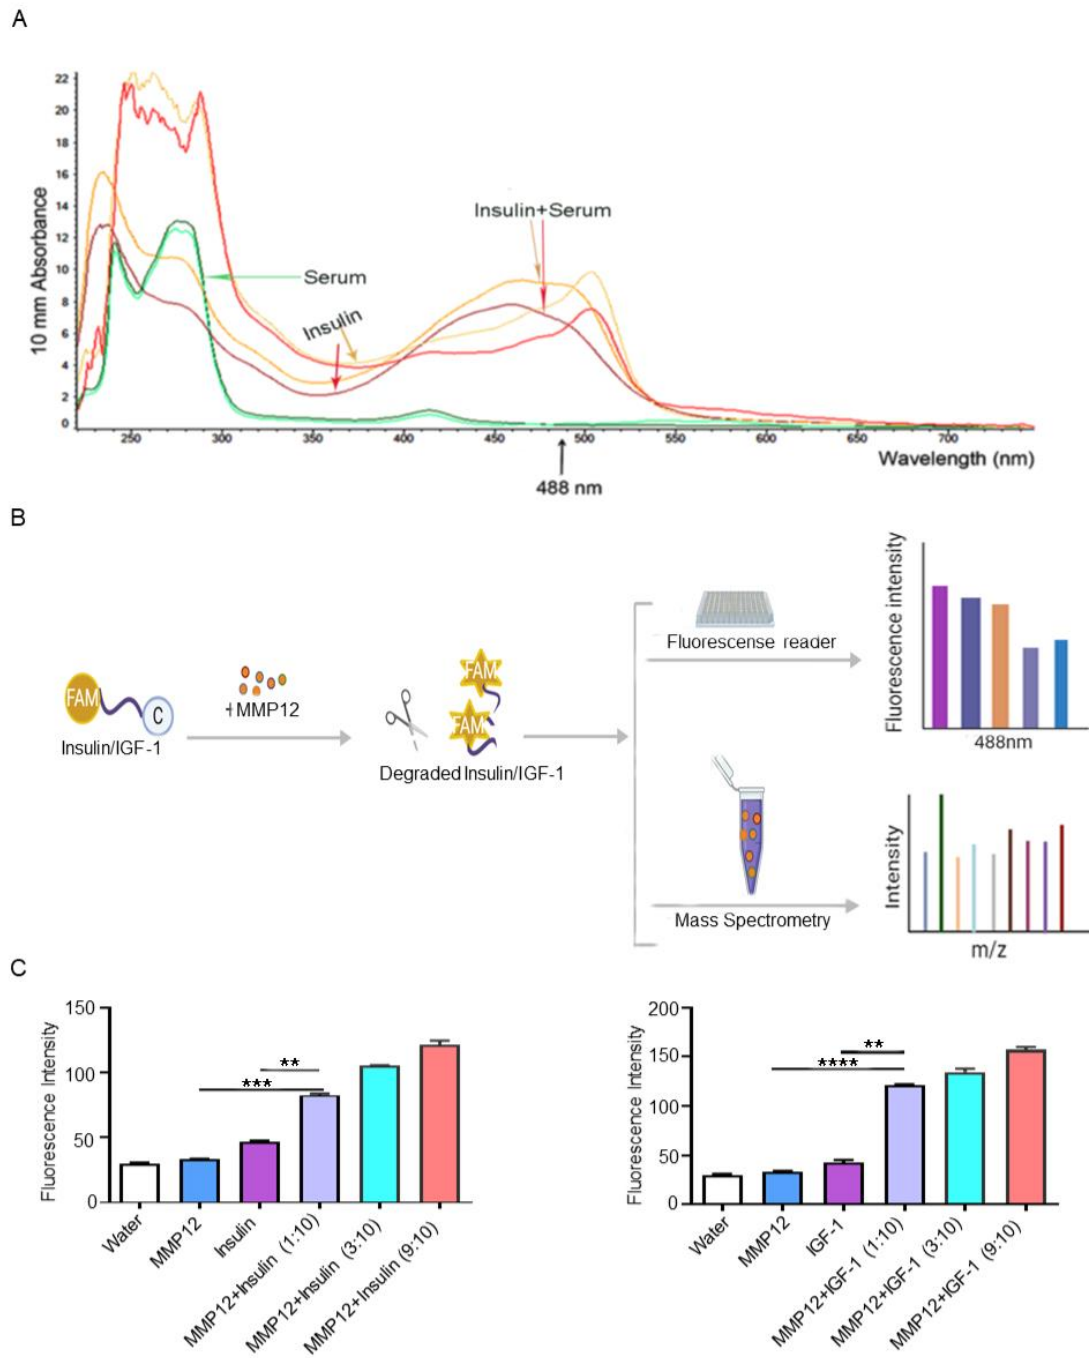

902

903

904

905

906 **Figure 5. MMP12 can degrade insulin and insulin-like growth factor-1**

907 (A) Representative picture of the peak shift after the insulin polypeptide interacts with serum. (A) The  
908 synthetic insulin (or insulin-like growth factor-1) peptide was labeled with FAM and DABCLY as shown;  
909 if the insulin (or insulin-like growth factor-1) peptide was degraded, the FAM signal was detected. This  
910 is based on fluorescence resonance energy transfer (FRET); Detection of characteristic peaks of insulin  
911 alone and the mixture of insulin (or insulin-like growth factor-1) and MMP12 by ionization mass spec-  
912 trometry. (C)The coexistence of MMP12 and insulin (or insulin-like growth factor-1) peptide led to a  
913 fluorescence signal and appeared dose-dependent ( $***P < 0.001$ ,  $**P < 0.01$ ; data are shown as the means  
914  $\pm$  SD).

Figure 6

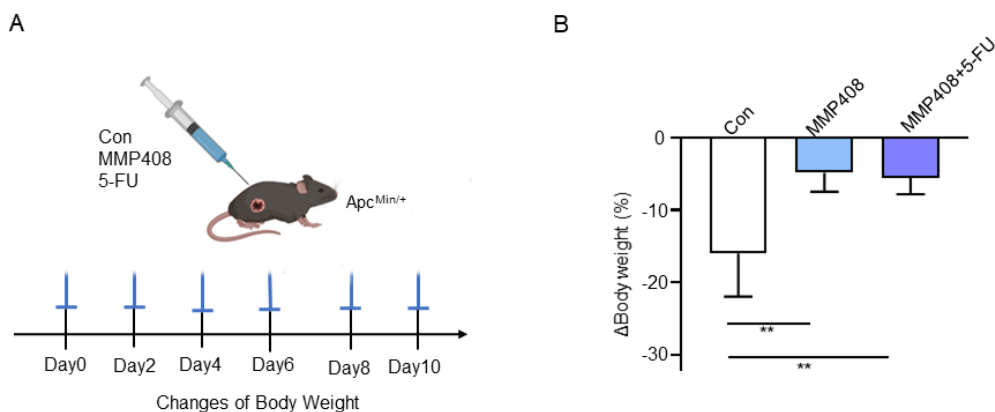

915

916 **Figure 6. Inhibiting MMP12 in Apc<sup>Min/+</sup> mice reduces weight loss**

917 (A)Schematic diagram of the administration process of 17-week Apc<sup>Min/+</sup> mice. The drug was given every  
918 two days (MMP408-5mg/kg, 5-FU-30mg/kg). The saline group was used as a control. (B) Percentage of  
919 weight gain compared to the basal weight after administration of drugs in Apc<sup>Min/+</sup> mice ( $**P < 0.01$ , data  
920 are shown as the means  $\pm$  SD; n = 5 per group).

921 .

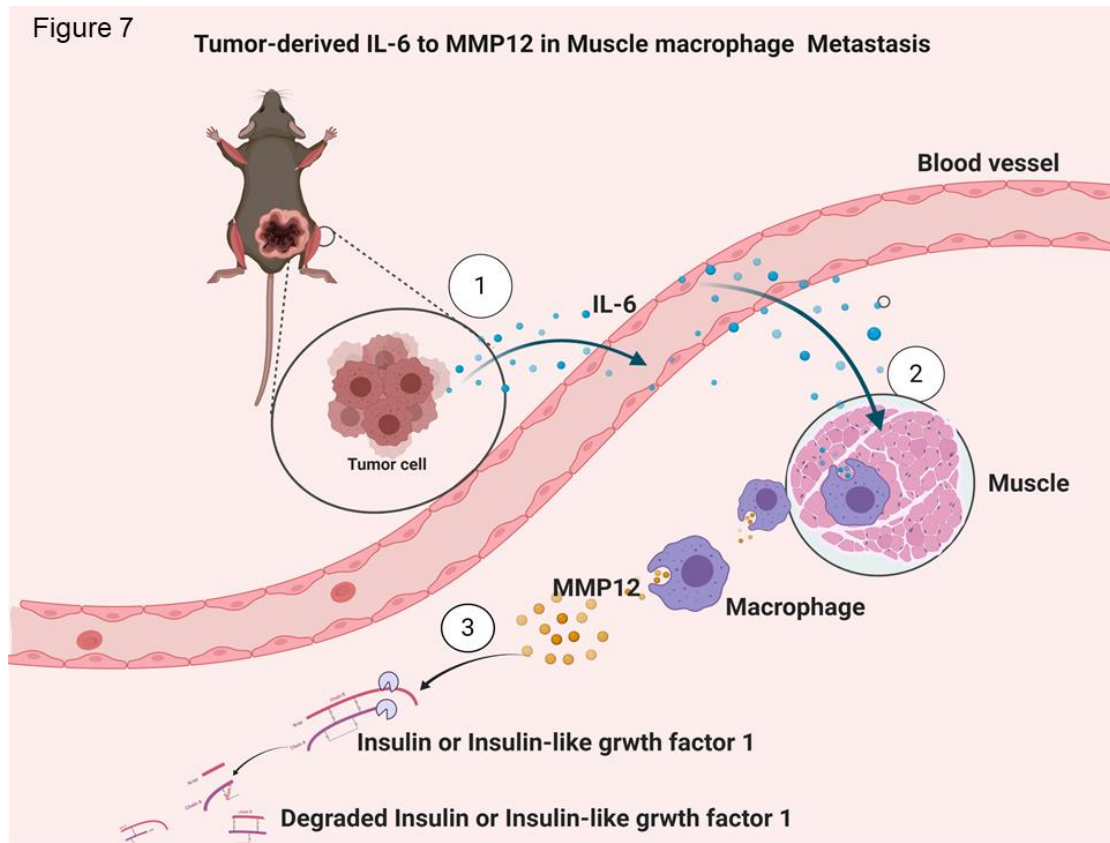

923 **Figure 7.** The role of MMP12 in the crosstalk between tumor and muscular macrophage in  
924 cancer cachexia.

925

926

927

928

929

930

931

932

933



934 **Supplementary data**

Figure S1

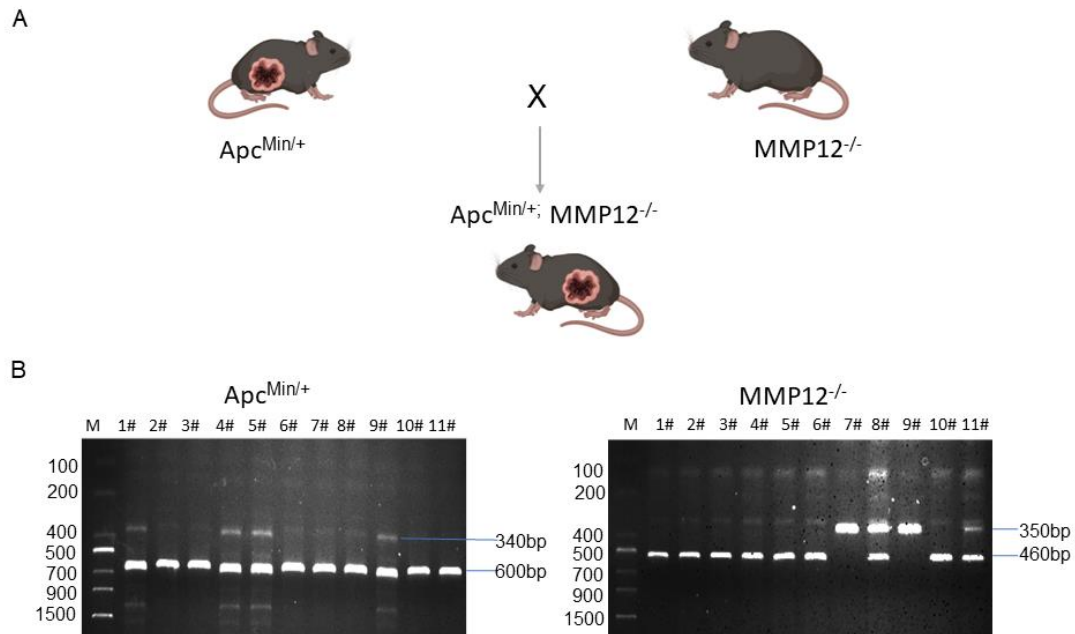

935

936 **Figure S1** Mouse crossbreeding and genotype identification.

937 A. Schematic of the crossbreeding of  $Apc^{Min/+}$  mice with  $MMP12^{-/-}$  mice to obtain  $Apc^{Min/+};$

938  $MMP12^{-/-}$  mice. B. The APC gene mutant PCR product size was 340 bp, and the PCR product size of

939 wild-type (WT) mice was 600 bp. The MMP12 knockout (mutation) PCR product size was 460 bp, and

940 the WT (WT) PCR product size was 350 bp. In detail,  $Apc^{Min/+}$ :1#, 4#, 5#, 9#;  $MMP12^{-/-}$ :1#, 2#, 3#, 4#,

941 5#, 6#, 10#, 11#;  $Apc^{Min/+}; MMP12^{-/-}$ :1#, 4#, 5#.

942

943

Figure S2

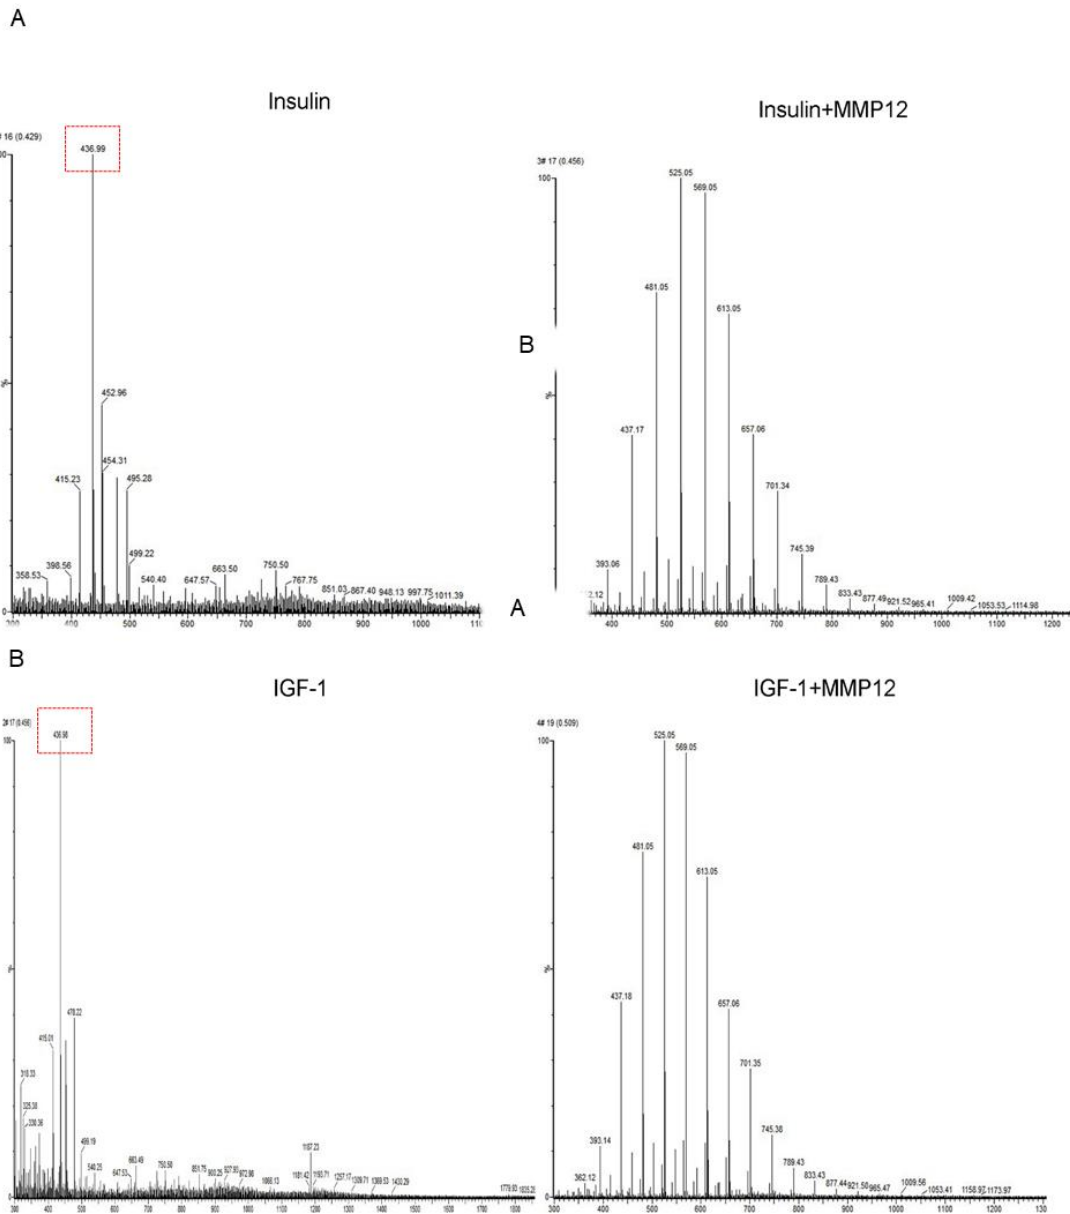

944

945 **Figure S2** Ionization mass spectrometry analysis report: the characteristic peak of insu-

946 **lin (insulin-like growth factor 1) disappears after incubating with MMP12.**

947 (A) The characteristic peak of insulin ( $m/z = 436.99$ ) and disappeared after incubation with MMP12.

948 (B) The characteristic peak of insulin-like growth factor 1 ( $m/z = 436.98$ ) disappeared after incubation

949 with MMP12.



---

953 **[Figure S3](#) Knockout of MMP12 does not affect the food intake of  $Apc^{Min/+}$  mice and**  
954 **MMP12 is expressed in bone marrow, muscle, liver and adipose tissue.**

955 (A) There was no difference in food intake between  $Apc^{Min/+}$  mice and  $Apc^{Min/+}; MMP12^{-/-}$  mice. The  
956 weight of food consumed after fasting for 8 h was measured every day starting on 17-week. Each group  
957 of mice had three cages, and each cage had 5 mice. (B) Immunostaining of MMP12-positive in muscle  
958 (gastrocnemius) from the clinical individual. Scale bar, 50 $\mu$ m. (C) A mRNA analysis of the data got  
959 from The Cancer Genome Atlas (TCGA) for GTEx, Illumina, BioGPS and SAGE of MMP12 gene in  
960 normal human tissues.

Figure S4

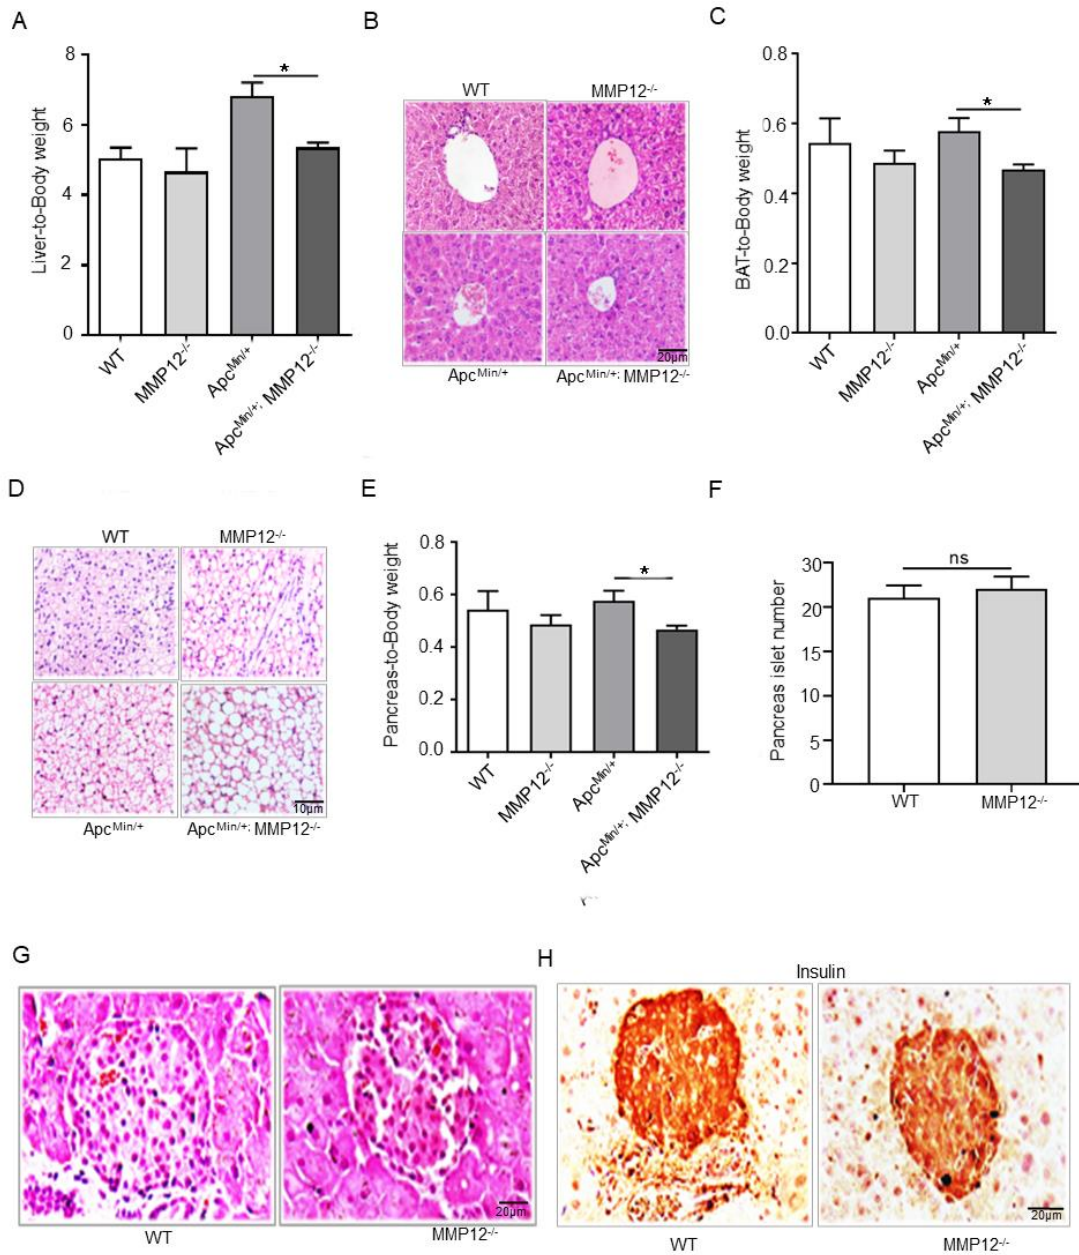

961

962

963

---

964 **[Figure S4](#) The effect of knocking out MMP12 in  $Apc^{Min/+}$  mice on liver, brown adi-**  
965 **pose tissue and pancreatic islets.**

966 (A) The liver-to-body weight ratio. (B) Hematoxylin and eosin staining (H&E) of the liver at 24 weeks.  
967 Scale bar, 20 $\mu$ m (\* $P < 0.05$  data are shown as means  $\pm$  SD; n = 6 per group). (C) Brown adipose tissue-  
968 to-body weight ratio was higher in  $Apc^{Min/+}; MMP12^{-/-}$  mice than in  $Apc^{Min/+}$  mice (\* $P < 0.05$  data are  
969 shown as means  $\pm$  SD; n = 6 per group). (D) The results of H&E indicate that white fat increased  
970 in brown fat in MMP12 knockout mice. Scale bar, 10 $\mu$ m. (E) The pancreas-to-body weight ratio  
971 (\* $P < 0.05$  data are shown as means  $\pm$  SD; n = 6 per group). (F) The number of islets between WT and  
972  $MMP12^{-/-}$  mice ( $P > 0.05$ ; data are shown as the means  $\pm$  SD; n = 6 per group). (G) The staining results  
973 of H&E for pancreas WT and  $MMP12^{-/-}$  mice at 24 weeks. Scale bar, 20 $\mu$ m. (H) Immunostaining of

974 insulin-positive in WT mice and in MMP12<sup>-/-</sup> pancreases at 24 weeks of age. Scale bar, 20 $\mu$ m.

Figure S5

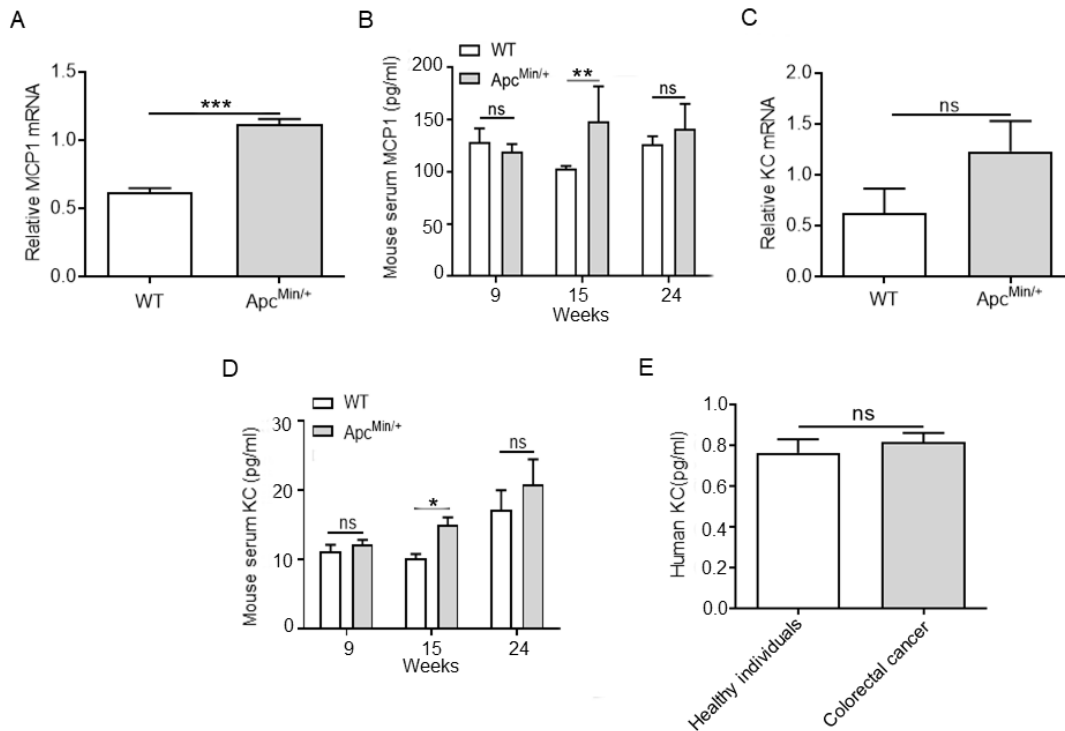

975

976 **Figure S5** Serum monocyte chemoattractant protein 1 (MCP1) and keratinocyte-de-  
977 rived chemokine(KC) did not change of Apc<sup>Min/+</sup> mice in cancer cachexia at 24 weeks of  
978 age.

979 (A, C) The mRNA expression of MCP1 and KC was validated in normal intestinal epithelium isolated  
980 from WT mice versus that in intestinal tumors isolated from Apc<sup>Min/+</sup> mice by quantitative PCR  
981 (\*\*\*) $P < 0.001$  data are shown as means  $\pm$  SD;  $n = 4$  per group). (B, D) Serum MCP1 and KC in  
982 Apc<sup>Min/+</sup> mice versus WT mice at 9, 15 and 24 weeks (\*\* $P < 0.01$ , \* $P < 0.05$  data are shown as  
983 means  $\pm$  SD;  $n = 6$  per group). (E) Serum KC in normal healthy individuals and colorectal cancer patients by  
984 enzyme-linked immunosorbent assay ( $P > 0.05$ ; data are shown as the means  $\pm$  SD;  $n = 6$  per group).

Figure S6

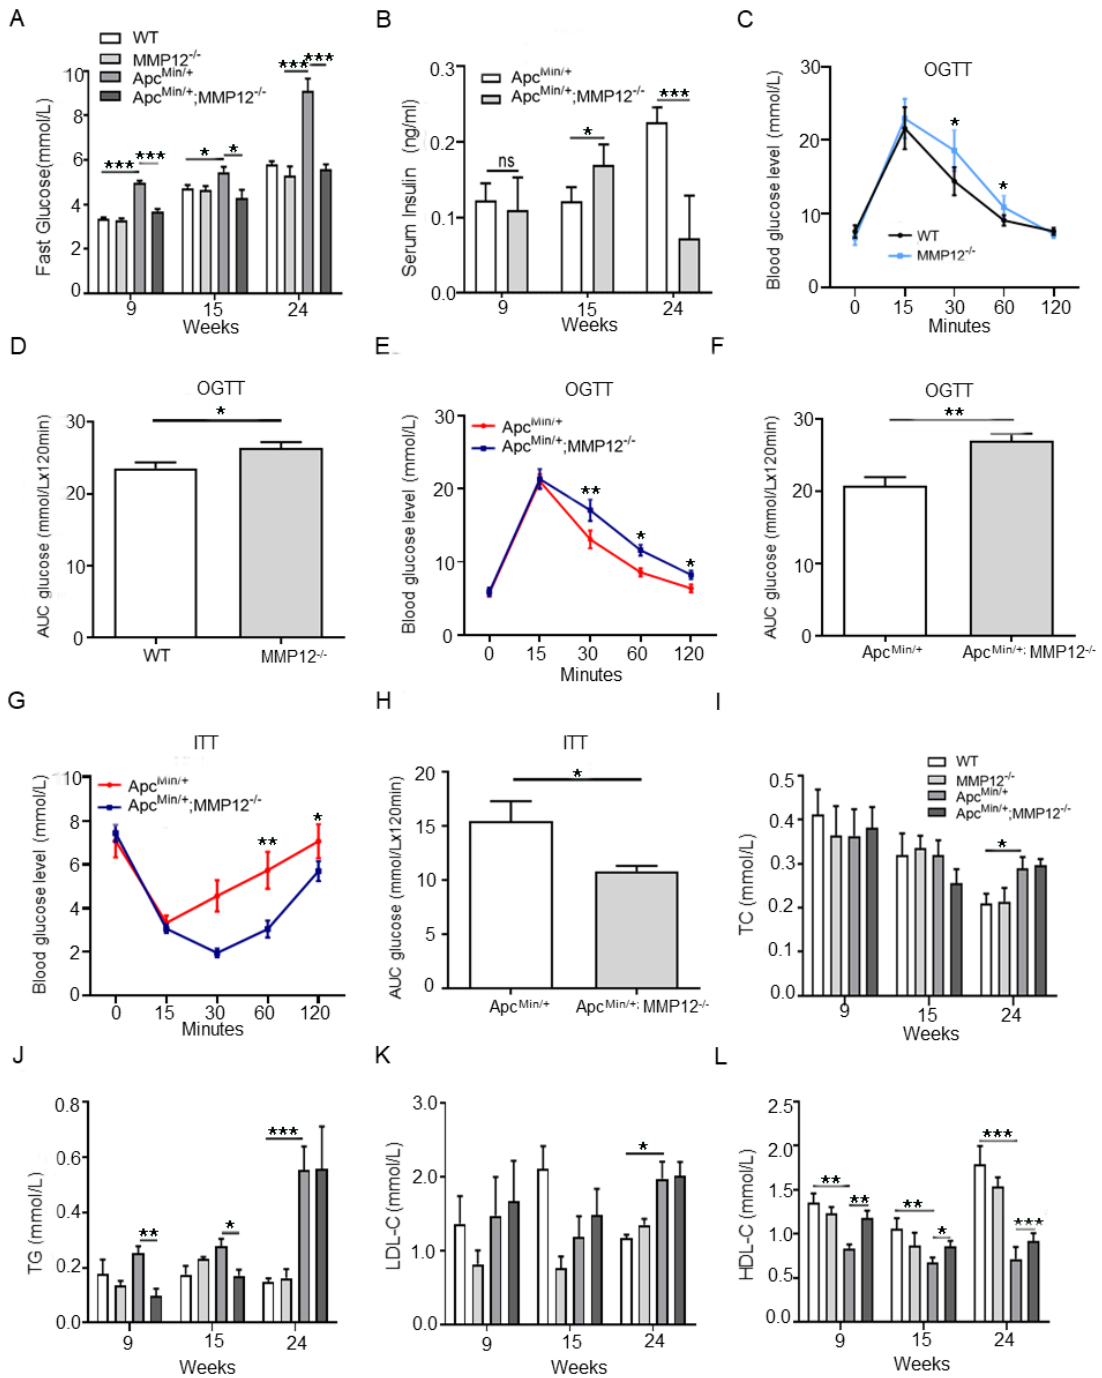

985

986

987



---

988 **Figure S6 Knockout MMP12 affects glycolipid metabolism in  $Apc^{Min/+}$  mice.**

989 (A) Fasting plasma glucose levels at 9, 15 and 24 weeks of age in WT mice,  $MMP12^{-/-}$  mice,  $Apc^{Min/+}$   
990 mice and  $Apc^{Min/+}; MMP12^{-/-}$  mice ( $***P < 0.001$ ,  $*P < 0.05$ ; data are shown as the means  $\pm$  SD;  $n = 4$   
991 per group). (B) Enzyme-linked immunosorbent assay was used to detect fasting serum insulin levels in  
992  $Apc^{Min/+}$  and  $Apc^{Min/+}; MMP12^{-/-}$  mice at approximately 9, 15 and 24 weeks of age ( $***P < 0.001$ ;  $*P <$   
993  $0.05$ ; data are shown as the means  $\pm$  SD;  $n = 4$  per group). (C) Oral Glucose Tolerance Test (OGTT):  
994 WT,  $MMP12^{-/-}$  mice were fasted for 4 h and then administered glucose (75 IU/kg), ( $*P < 0.05$ ; data are  
995 shown as the means  $\pm$  SD;  $n = 6$  per group). (D) Area under the curves for the OGTT-AUG, which was  
996 increased in  $MMP12^{-/-}$  mice compared with that in WT mice ( $*P < 0.05$  data are shown as means  $\pm$  SD;  
997  $n = 6$  per group). (E) OGTT:  $Apc^{Min/+}$  and  $Apc^{Min/+}; MMP12^{-/-}$  mice were fasted for 4 h and then admin-  
998 istered glucose (75 IU/kg), ( $**P < 0.01$ ,  $*P < 0.05$  data are shown as means  $\pm$  SD;  $n = 6$  per group). (F)  
999 Areas under the curves for the OGTT-AUG, which was significantly increased in  $Apc^{Min/+}; MMP12^{-/-}$   
1000 mice compared with that in  $Apc^{Min/+}$  mice ( $**P < 0.01$ , data are shown as means  $\pm$  SD;  $n = 6$  per group)  
1001 (G) Insulin tolerance test (ITT): mice were fasted for 4 hours;  $Apc^{Min/+}$  and  $Apc^{Min/+}; MMP12^{-/-}$  mice  
1002 then received an ip injection of insulin ( $**P < 0.01$ , data are shown as means  $\pm$  SD;  $n = 6$  per group).  
1003 (H) Areas under the curves for the ITT-AUG, which was significantly decreased in  $Apc^{Min/+}; MMP12^{-/-}$   
1004 mice compared with that in  $Apc^{Min/+}$  mice ( $*P < 0.05$  data are shown as means  $\pm$  SD;  $n = 6$  per group).  
1005 (I-L) Quantitative determination of serum total cholesterol (TC), total triglyceride (TG), low density  
1006 lipoprotein-cholesterol (LDL-C), high density lipoprotein-cholesterol (HDL-C) in WT mice,  $MMP12^{-/-}$   
1007 mice,  $Apc^{Min/+}$  mice and  $Apc^{Min/+}; MMP12^{-/-}$  mice by kits at 9, 15 and 24 weeks of age ( $***P < 0.001$ ,

1008 \*\* $P < 0.01$ , \* $P < 0.05$  data are shown as means  $\pm$  SD; n = 7 per group).

Figure S7

Cytokine Assay

| BLC<br>(CXCL13)         | CD30 Ligand<br>(TNFSF8) | Eotaxin-1<br>(CCL11)          | Eotaxin-2<br>(MIPF-2/CCL24) | Fas Ligand<br>(TNFSF6)  |
|-------------------------|-------------------------|-------------------------------|-----------------------------|-------------------------|
| Fractalkine<br>(CX3CL1) | GCSF                    | GM-CSF                        | IFN-gamma                   | IL-1 alpha<br>(IL-1 F1) |
| IL-1 beta<br>(IL-1 F2)  | IL-2                    | IL-3                          | IL-4                        | IL-6                    |
| IL-9                    | IL-10                   | IL-12 p40/p70                 | IL-12 p70                   | IL-13                   |
| IL-17A                  | I-TAC<br>(CXCL11)       | KC<br>(CXCL1)                 | Leptin                      | LIX                     |
| Lymphotactin<br>(XCL1)  | MCP-1<br>(CCL2)         | M-CSF                         | MIG<br>(CXCL9)              | MIP-1 alpha<br>(CCL3)   |
| MIP-1 gamma             | RANTES<br>(CCL5)        | SDF-1 alpha<br>(CXCL12 alpha) | I-309<br>(TCA-3/CCL1)       | TECK<br>(CCL25)         |
| TIMP-1                  | TIMP-2                  | TNF alpha                     | TNF RI<br>(TNFRSF1A)        | TNF RII<br>(TNFRSF1B)   |

1009

1010 **[Figure S7](#) Specific detection factors in the protein chip. Protein chip contains 40 kinds of**  
1011 **cytokine detection indicators.**

1012

1013

1014

1015

1016

1017

1018

1019 **Table1: Quantitative PCR primers.**

| S <a href="#">Table1</a> List of quantitative PCR primers |                  |                         |                         |
|-----------------------------------------------------------|------------------|-------------------------|-------------------------|
| Gene Name                                                 | Accession Number | Forward (5'-3')         | Reverse (5'-3')         |
| m-MMP12                                                   | nm_001320076.1   | GAGTCCAGCCACCAACATTAC   | GCGAAGTGGGTCAAAGAC      |
| m-GAPDH                                                   | nm.001289726.1   | CGTCCCGTAGACAAAATGGT    | TCAATGAAGGGGTCTTGAT     |
| m-IL6                                                     | nm.31168         | TAGTCCTTCCTACCCCAATTTC  | TTGGTCCTTAGCCACTCCTTC   |
| m-MCP1(CCL2)                                              | nm.11333         | TTAAAAACCTGGATCGGAACCAA | GCATTAGCTTCAGATTTACGGGT |
| m-KC(CXCL1/IL8)                                           | nm.008176        | CTGGGATTCACCTCAAGAACATC | CAGGGTCAAGGCAAGCCTC     |
| Note: m, mouse.                                           |                  |                         |                         |

1020

1021

1022

1023

1024

1025

1026

1027

1028 **Table 2** The effect of IL-6 on body weight

| S <a href="#">Table 2</a>                    |                                                                                                                                                                                                                                                                                                                                                                                                                                                                                                   |                                                        |
|----------------------------------------------|---------------------------------------------------------------------------------------------------------------------------------------------------------------------------------------------------------------------------------------------------------------------------------------------------------------------------------------------------------------------------------------------------------------------------------------------------------------------------------------------------|--------------------------------------------------------|
| Various studies on IL-6                      | Highlights of Impact on Body Weight (fat or muscle)                                                                                                                                                                                                                                                                                                                                                                                                                                               | PMID                                                   |
| Overexpression IL-6                          | Circulating IL-6 levels were increased and the animals rapidly lost both weight and body fat (often when mice bear tumors); Chronically elevated IL-6 levels lead to hyperinsulinemia, reduced body weight, impaired insulin-stimulated glucose uptake by the skeletal muscles. Systemic IL-6 overexpression in tumor-bearing <i>Apc<sup>Min/+</sup></i> mice accelerated cachexia development, which coincided with suppressed basal and eccentric contraction-induced muscle protein synthesis. | <a href="#">18437347</a> ;<br><a href="#">29641213</a> |
| IL-6 Inhibited (Inhibit the STAT3/JAK/IL-6R) | Mice body weight increase to resistant cancer cachexia. Therapeutic effects of IL-6R blockade on promoting muscle regeneration. IL-6R blockade has therapeutic effects on the dystrophic skeletal muscle.                                                                                                                                                                                                                                                                                         | <a href="#">31002945</a> ;<br><a href="#">11786910</a> |
| Cytokine IL-6 Treatment                      | Centrally acting IL-6 exerts anti-obesity effects in rodents.                                                                                                                                                                                                                                                                                                                                                                                                                                     | <a href="#">11786910</a> ;                             |
| IL-6 Neutralizing antibody Treatment         | IL-6 may indirectly cause muscle wasting.                                                                                                                                                                                                                                                                                                                                                                                                                                                         | <a href="#">20871233</a>                               |
| IL-6 KO under tumor-bearing                  | Centrally acting IL-6 exerts anti-obesity effects in rodents; <i>Apc<sup>(Min/+)</sup>/IL-6<sup>(-/-)</sup></i> mice did not lose gastrocnemius muscle mass or epididymal fat pad mass while overall polyp number decreased compared with <i>Apc<sup>(Min/+)</sup></i> mice.                                                                                                                                                                                                                      | <a href="#">11786910</a><br><a href="#">18056981</a>   |

---

|                                                         |                                                                                                                                                                                                                                                                                                                                      |                                                                                                       |
|---------------------------------------------------------|--------------------------------------------------------------------------------------------------------------------------------------------------------------------------------------------------------------------------------------------------------------------------------------------------------------------------------------|-------------------------------------------------------------------------------------------------------|
| <p>IL-6 overexpression<br/><br/>under tumor-bearing</p> | <p>Administration of an IL-6 receptor antibody to cachectic male Apc<sup>Min/+</sup> mice can attenuate further cachexia progression to increase body weight. IL-6 over-expression in pre-cachectic mice accelerated body weight loss and muscle wasting. IL-6 overexpression did not induce cachexia in non-tumor-bearing mice.</p> | <p><a href="#">25555992</a>;<br/><br/><a href="#">22769563</a>;<br/><br/><a href="#">18056981</a></p> |
|---------------------------------------------------------|--------------------------------------------------------------------------------------------------------------------------------------------------------------------------------------------------------------------------------------------------------------------------------------------------------------------------------------|-------------------------------------------------------------------------------------------------------|

1029

1030

1031

1032

1033

1034

1035

1036

1037

1038

1039

1040

1041

1042 **Table 3: Abbreviations**

| <b>Abbreviations</b>                        | <b>Full name</b>                                                           |
|---------------------------------------------|----------------------------------------------------------------------------|
| MMP12                                       | Matrix Metalloproteinases 12                                               |
| CRC                                         | Colorectal Cancer                                                          |
| CAC                                         | Cancer Cachexia                                                            |
| Apc <sup>Min/+</sup> ; MMP12 <sup>-/-</sup> | Apc <sup>Min/+</sup> ; MMP12 <sup>-/-</sup> mice                           |
| WAT                                         | White Adipose Tissue                                                       |
| BAT                                         | Brown Adipose Tissue                                                       |
| HRP                                         | Horseradish Peroxides                                                      |
| H&E                                         | Hematoxylin & Eosin                                                        |
| qPCR                                        | Quantitative Polymerase Chain Reaction                                     |
| IHC                                         | Immunohistochemistry                                                       |
| IF                                          | Immunofluorescence                                                         |
| PBS                                         | Phosphate Buffered Saline                                                  |
| MCP1(CCL2)                                  | Monocyte Chemoattractant Protein 1                                         |
| KC(CXCL1)                                   | Keratinocyte-derived Chemokine                                             |
| RANTES                                      | Regulated upon Activation, Normal T Cell Expressed and Presumably Secreted |
| IL-6                                        | Interleukin 6                                                              |
| IGF-1                                       | Insulin-like Growth Factor 1                                               |

1043

Figure 1

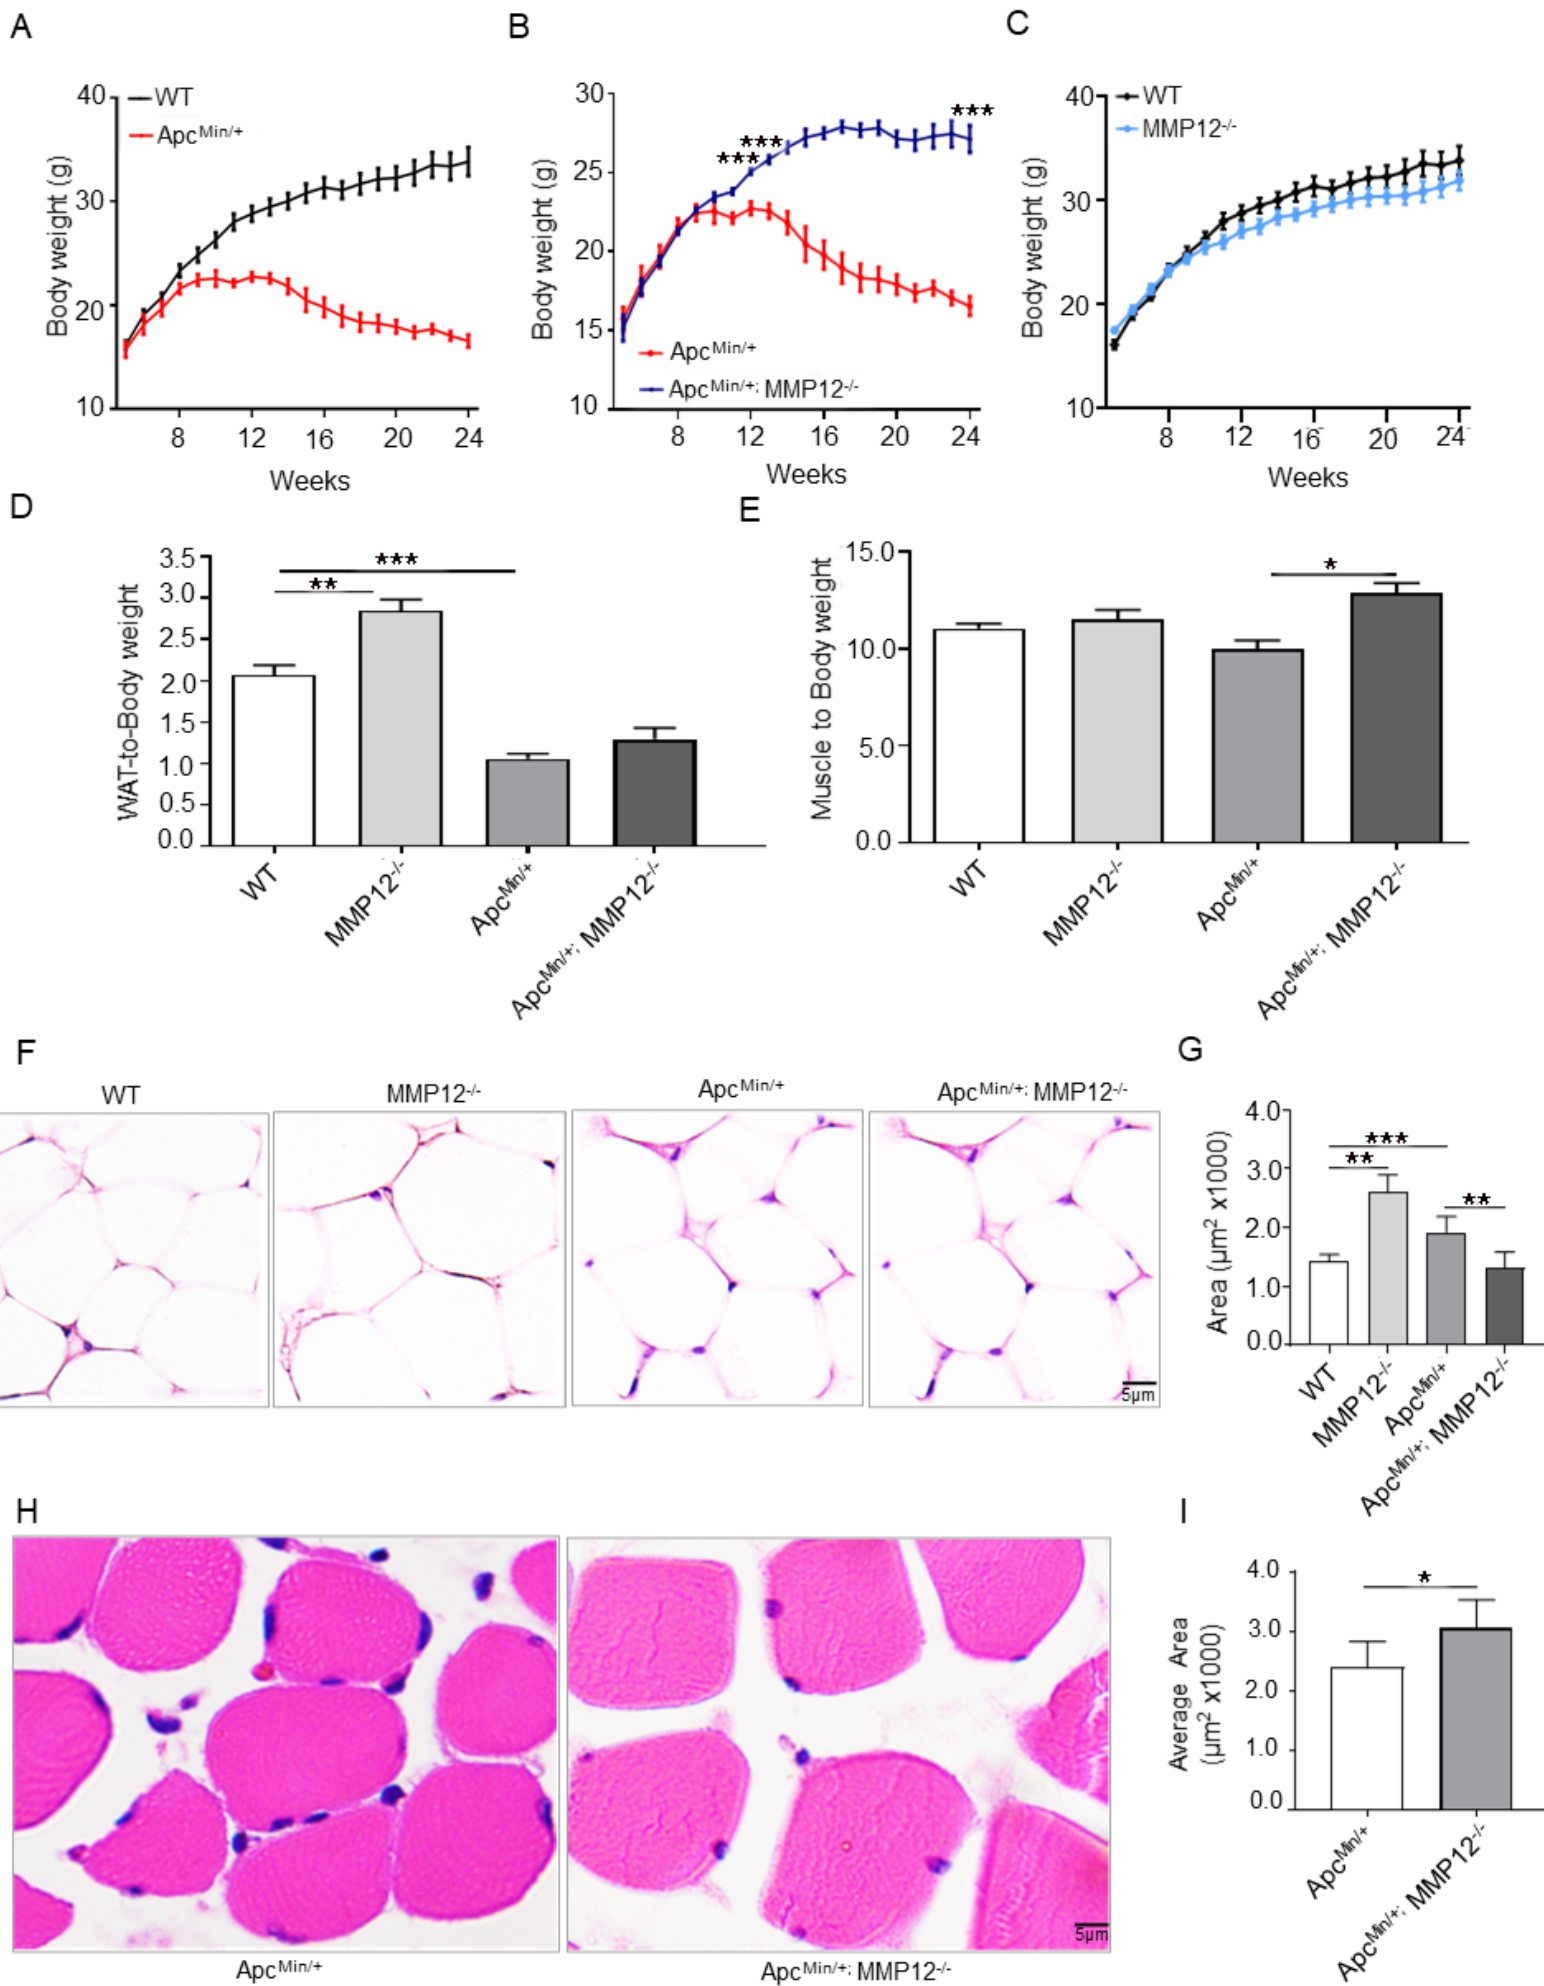

Figure 2

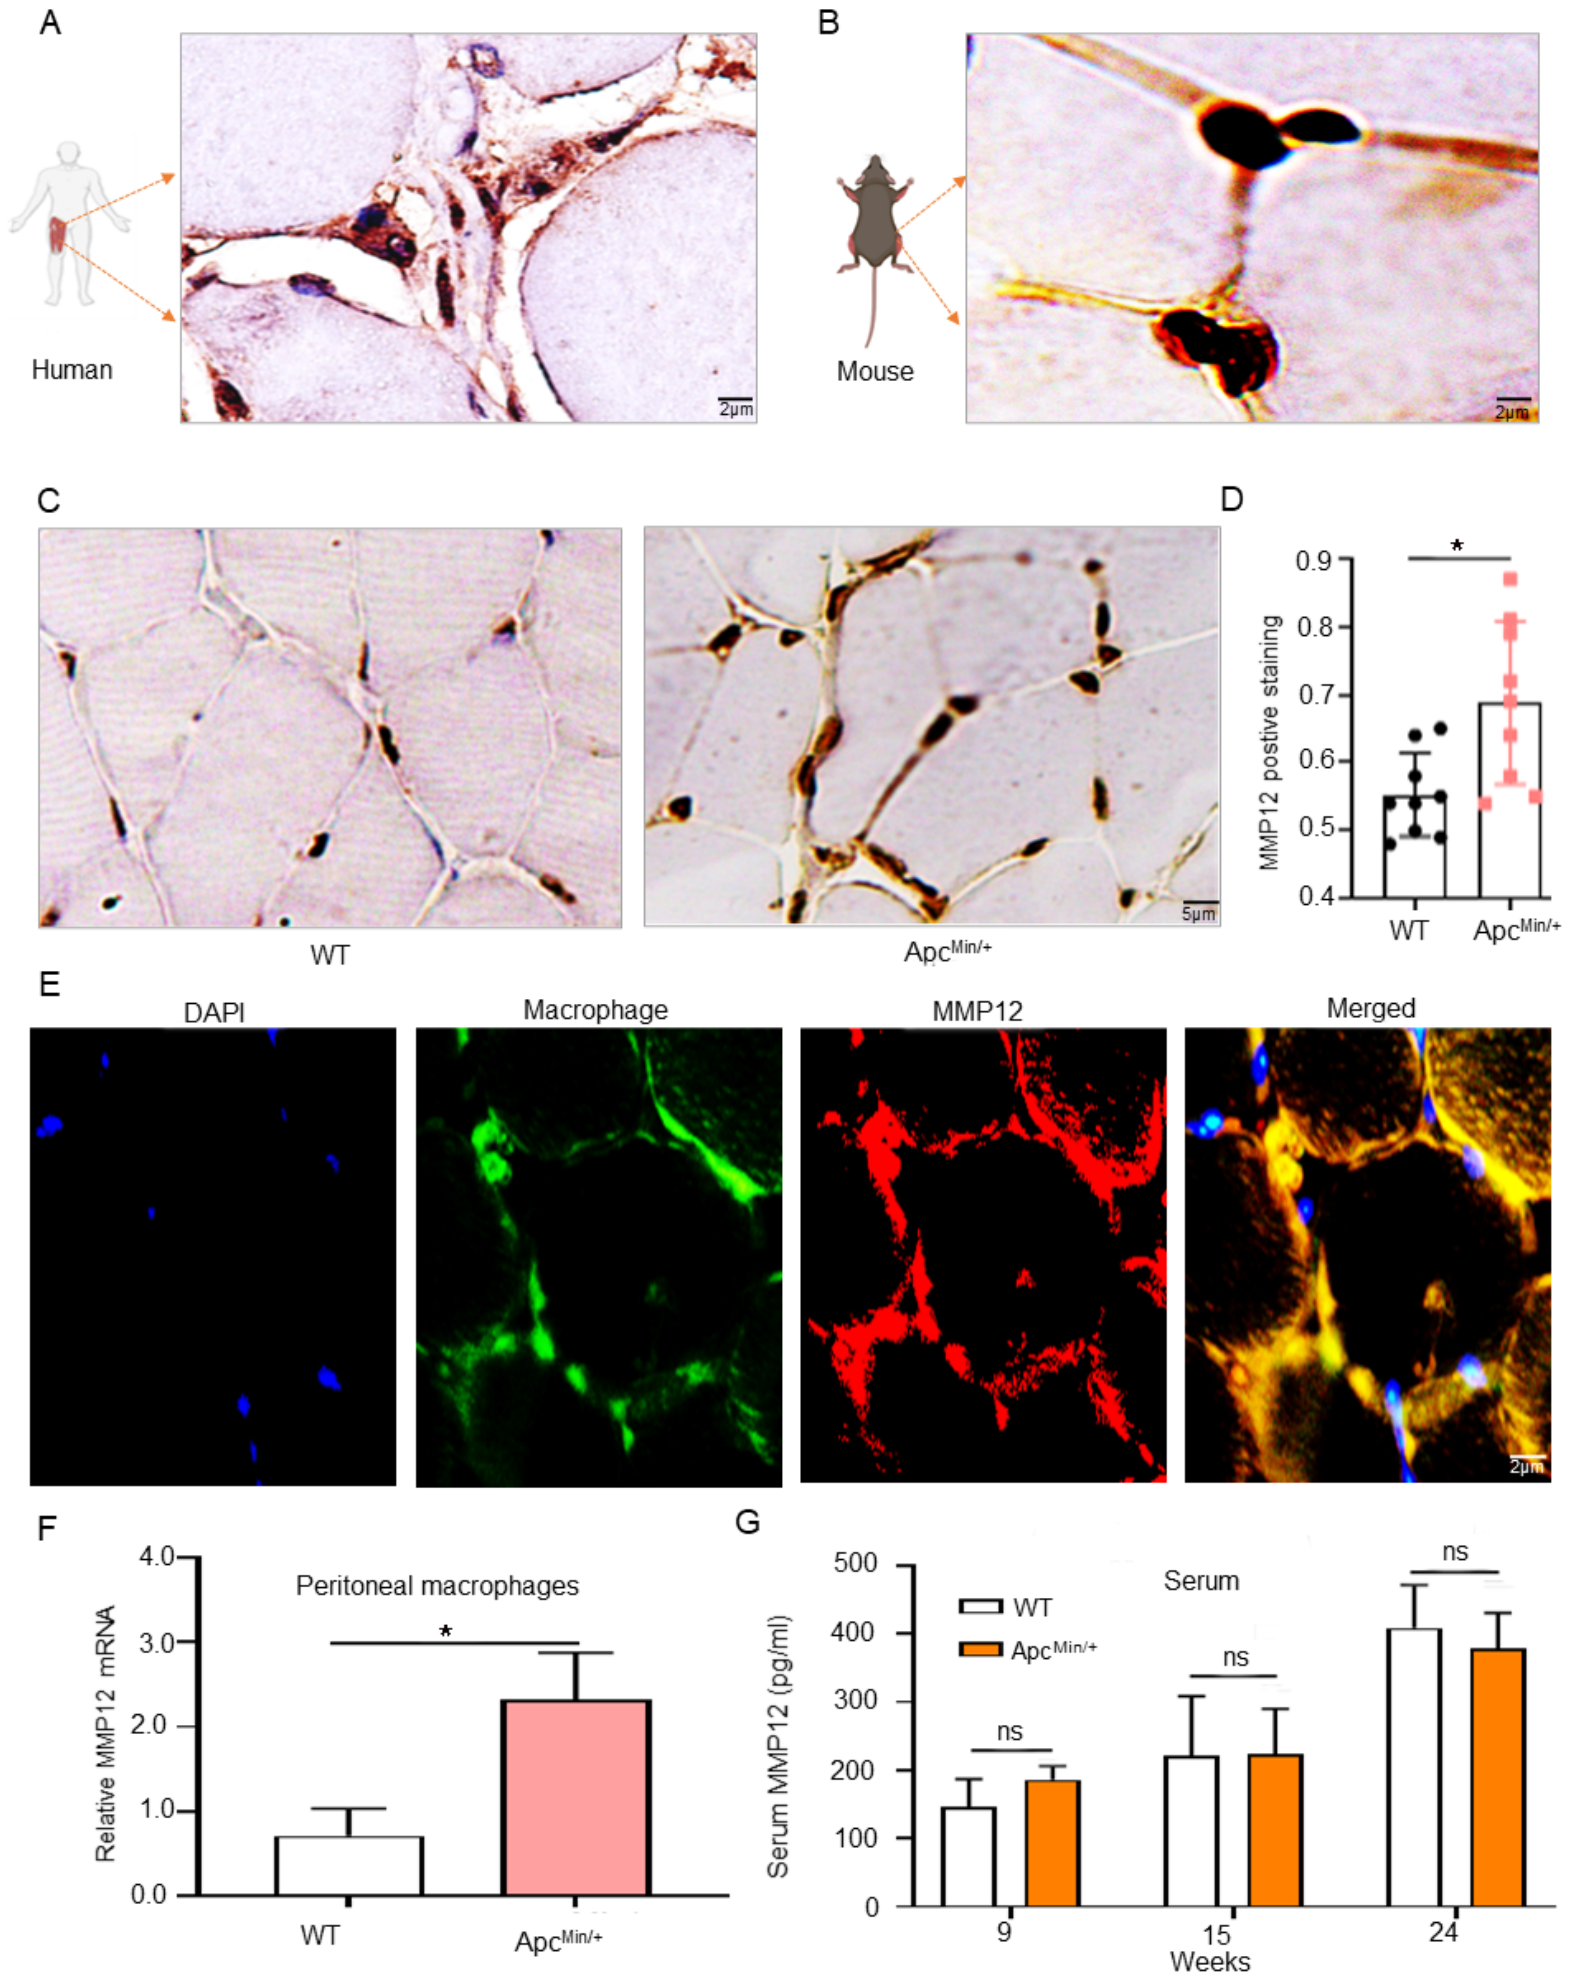



Figure 3

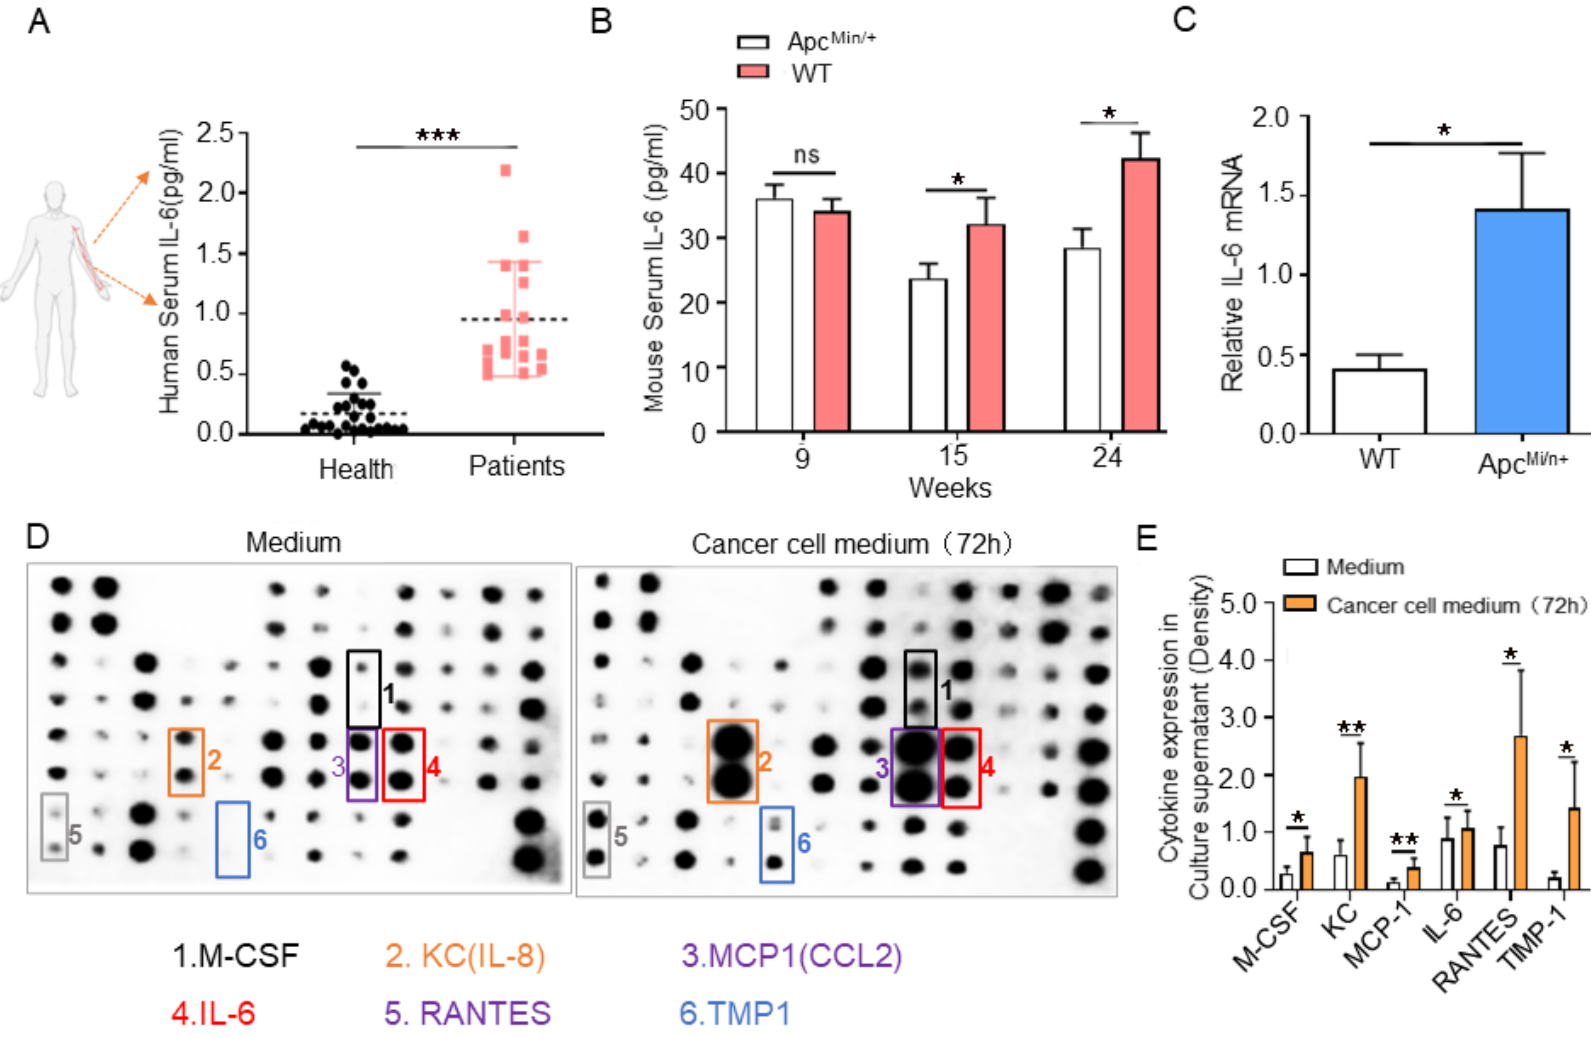

Figure 4

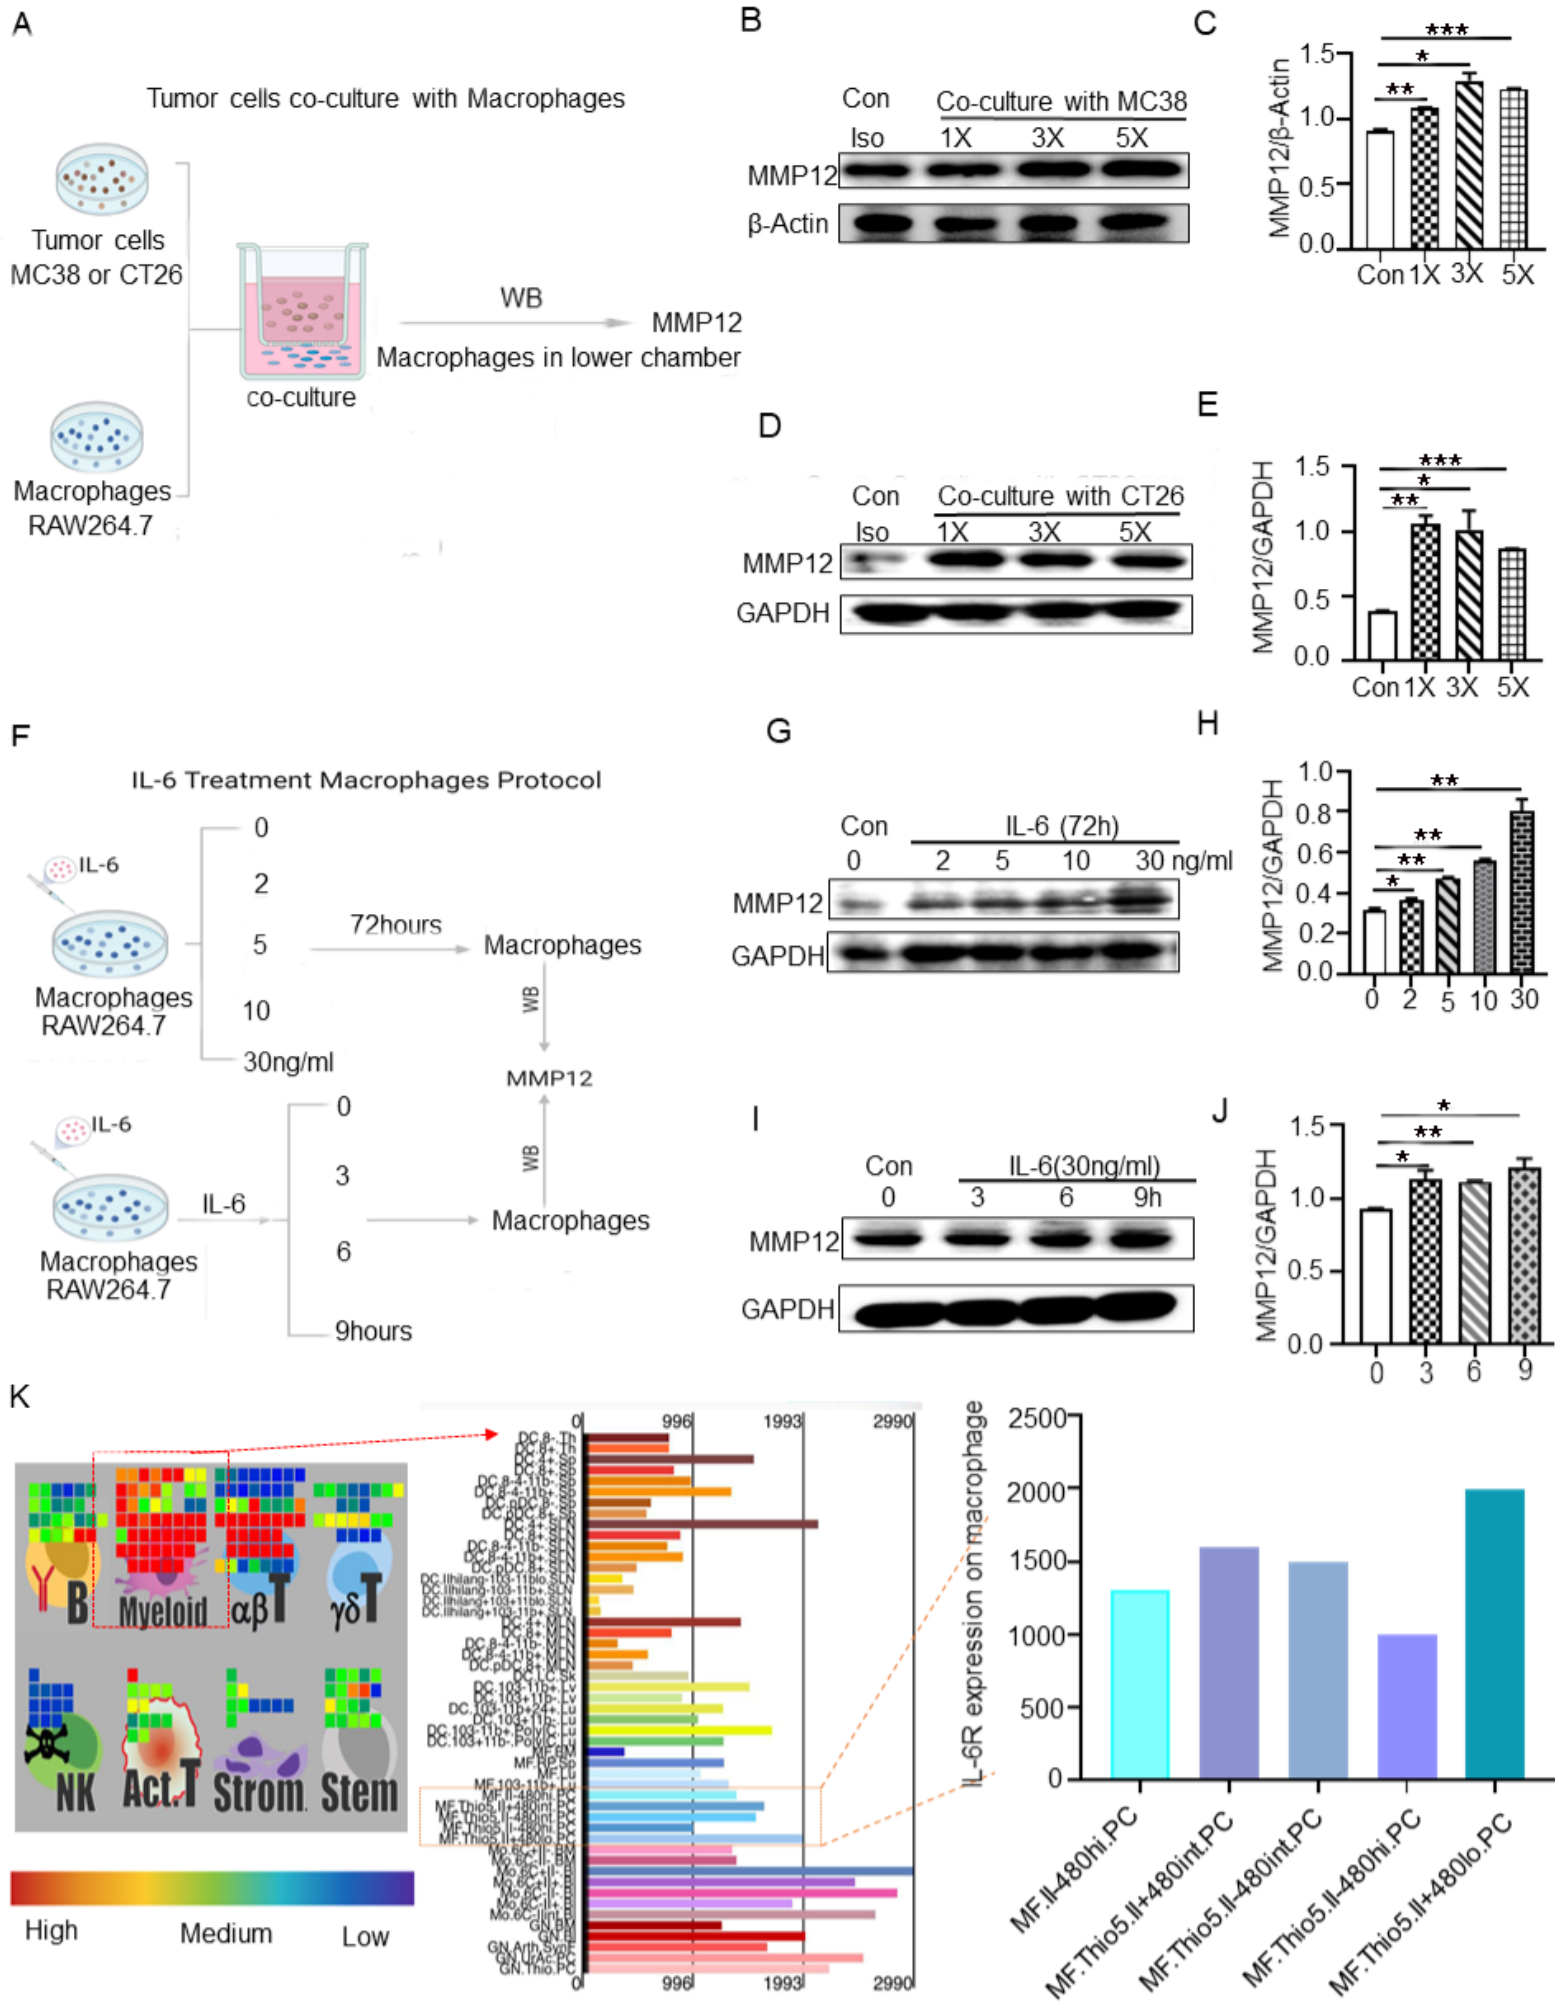

Figure 5

A

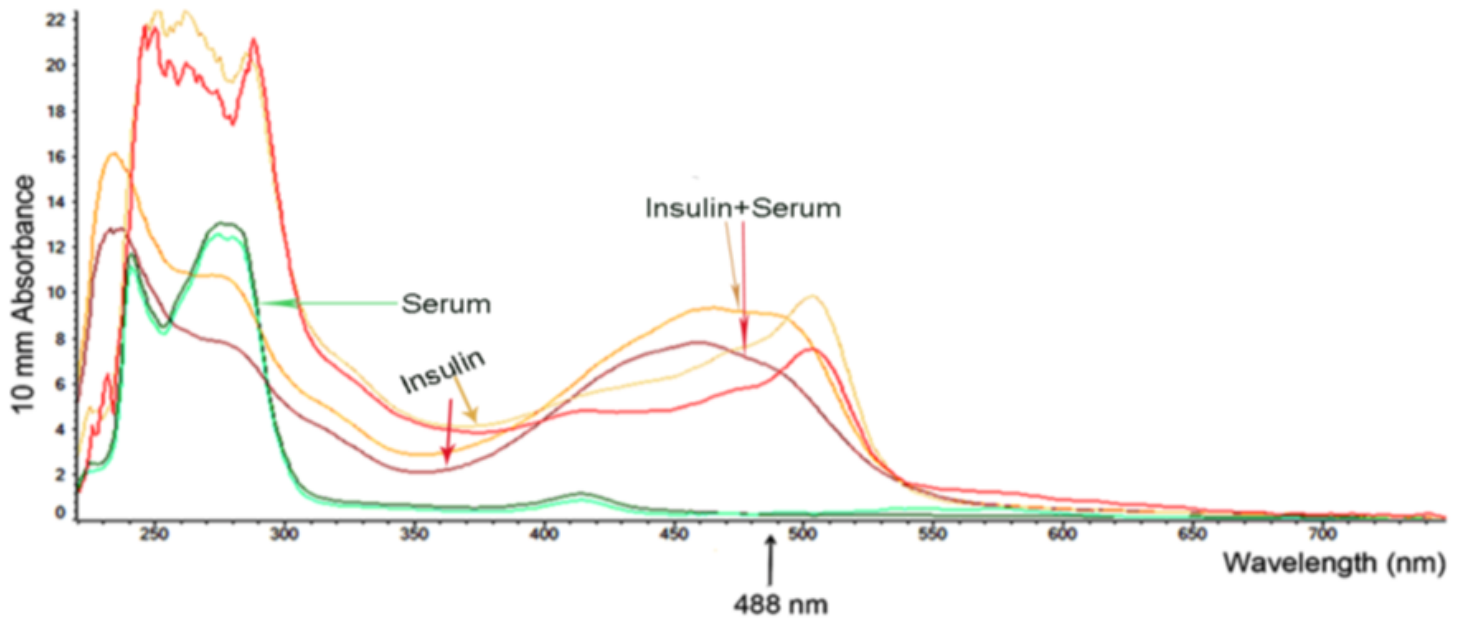

B

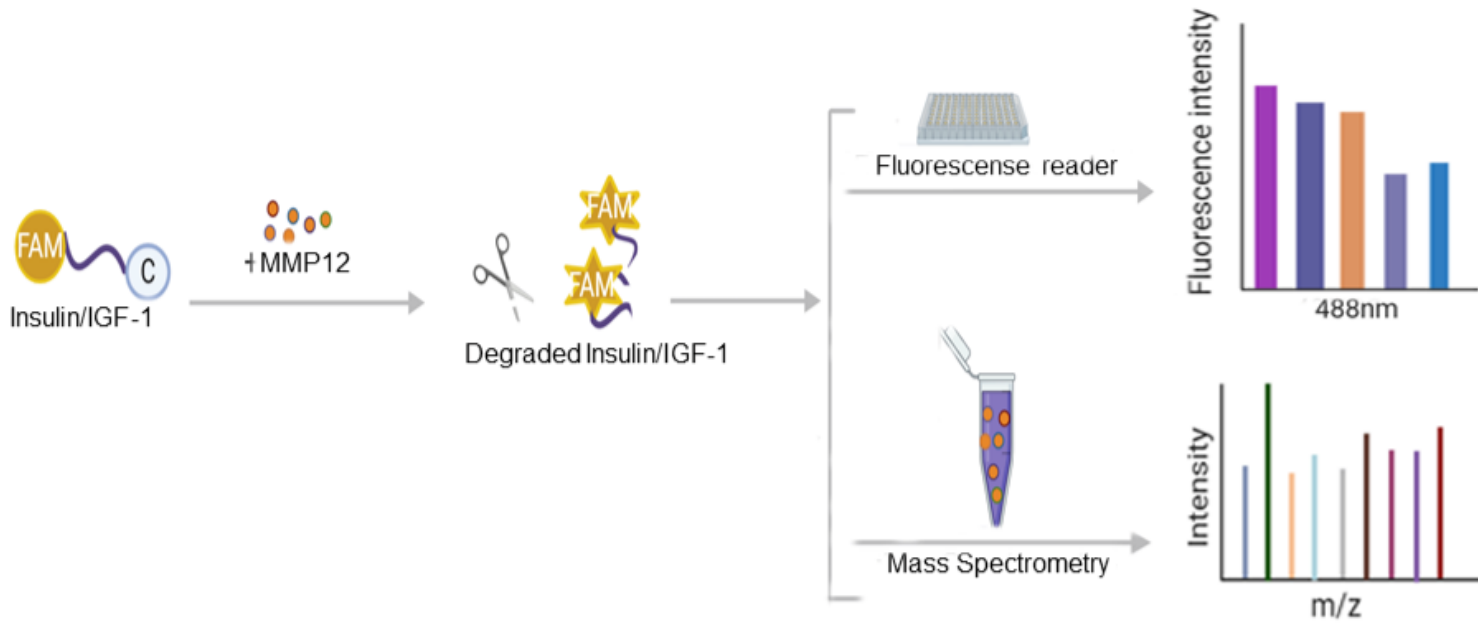

C

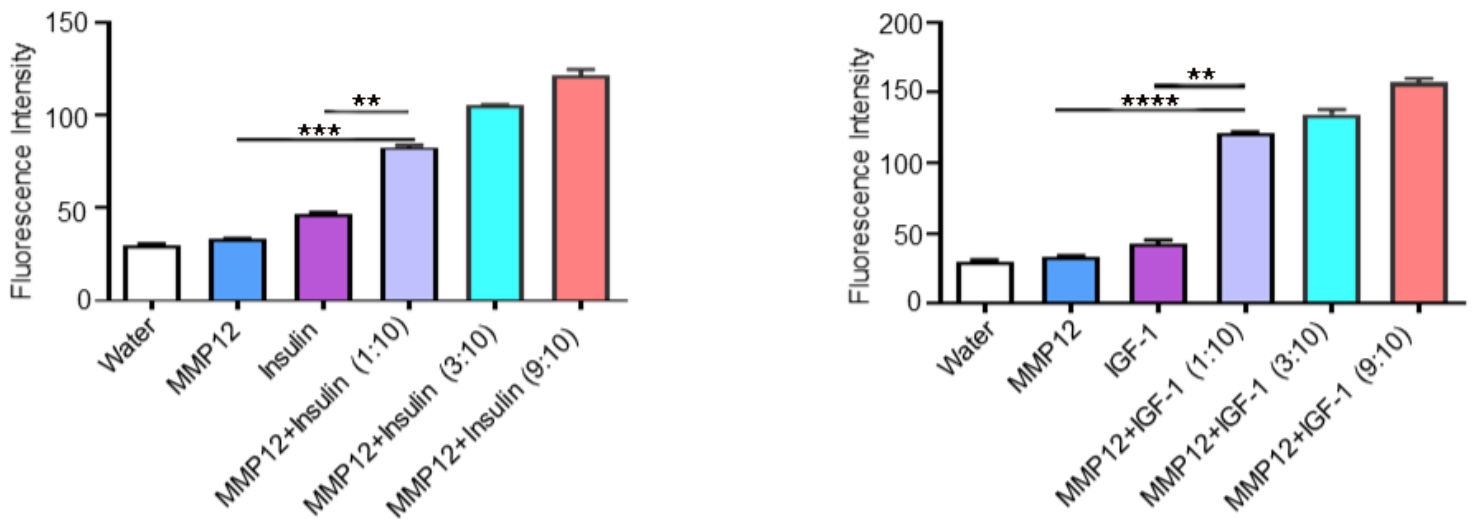

Figure 6

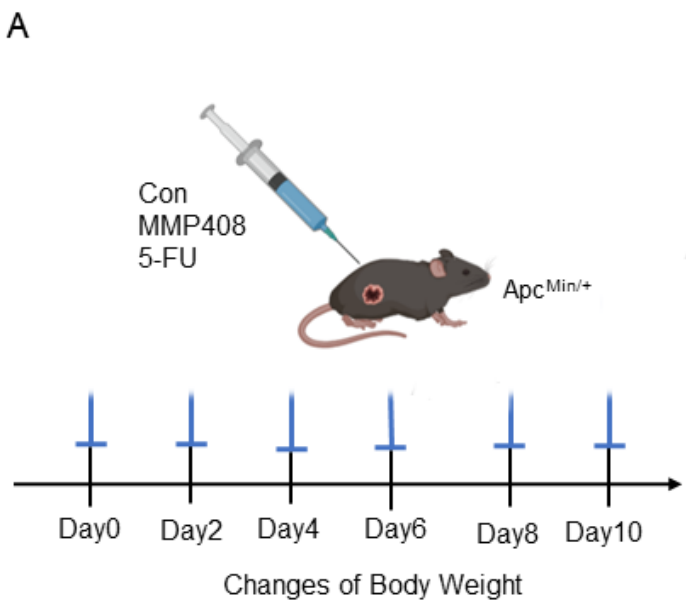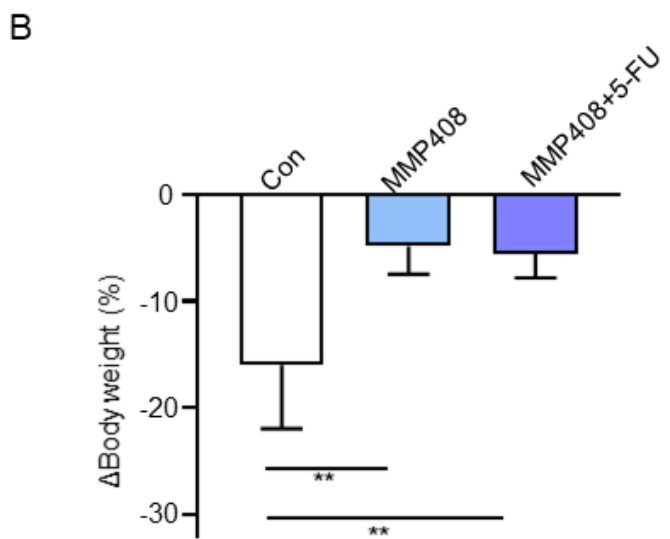

Figure 7

### Tumor-derived IL-6 to MMP12 in Muscle macrophage Metastasis

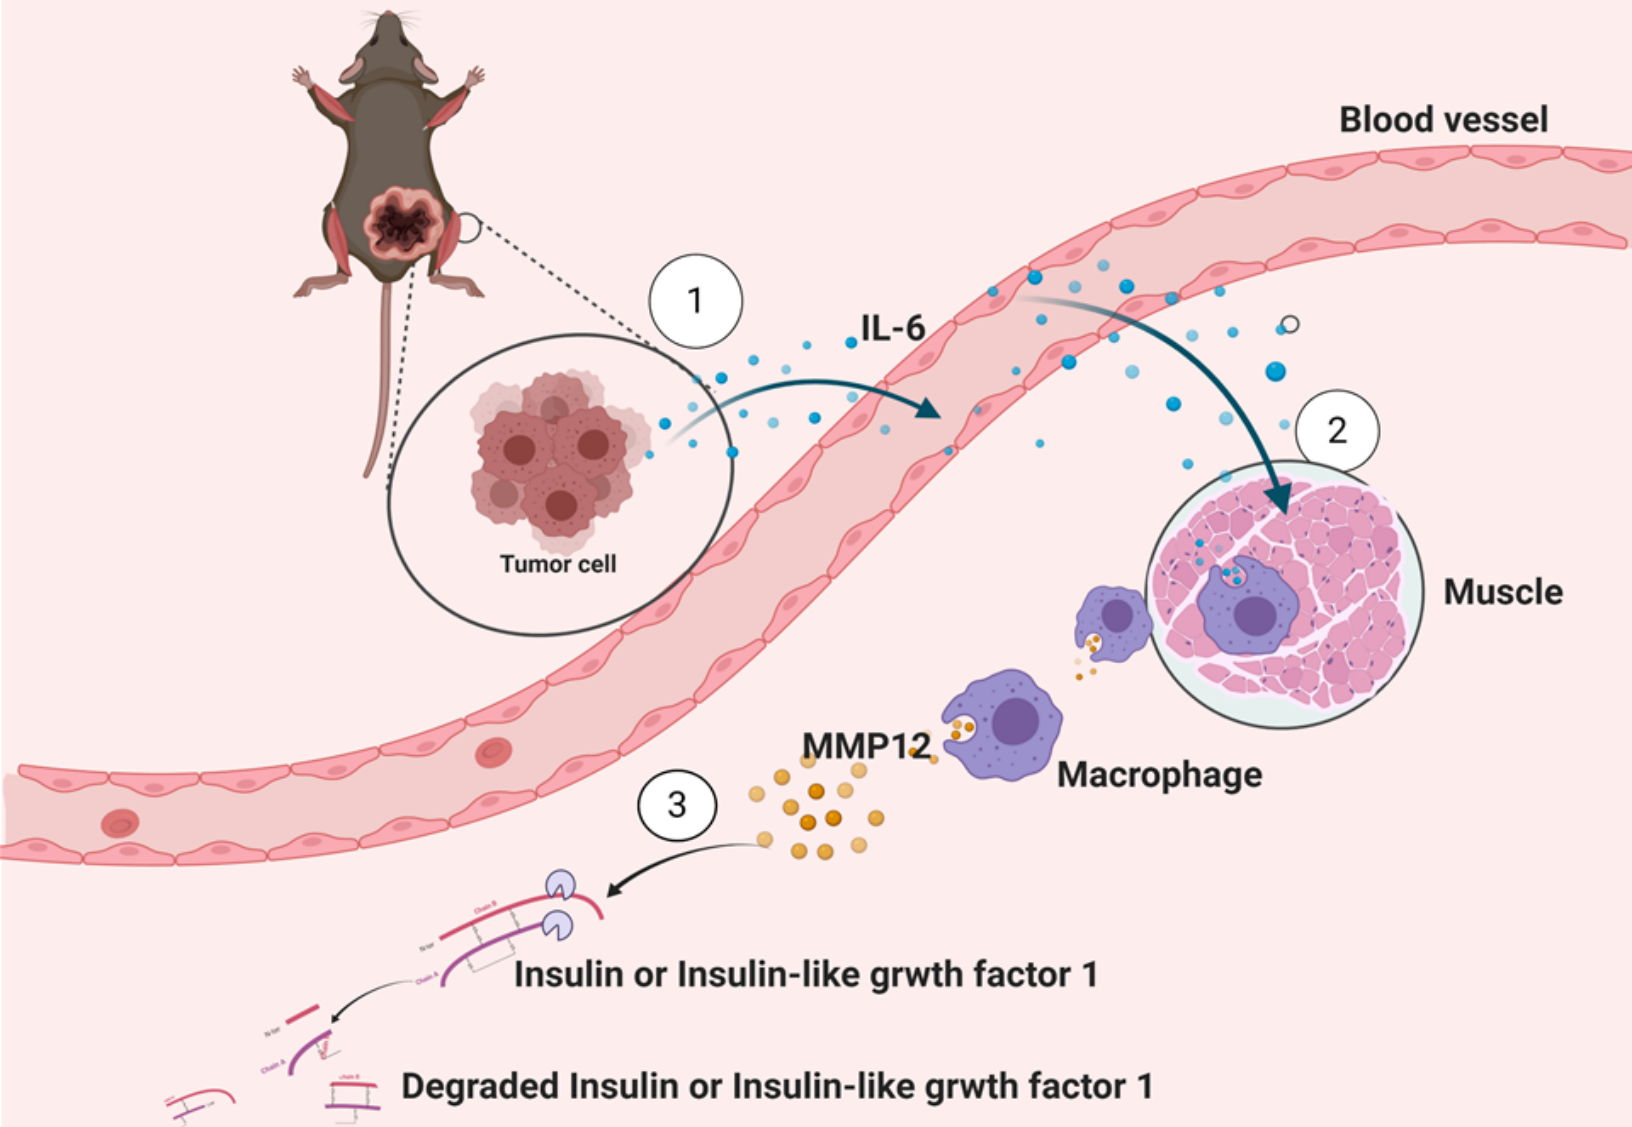

Figure S1

A

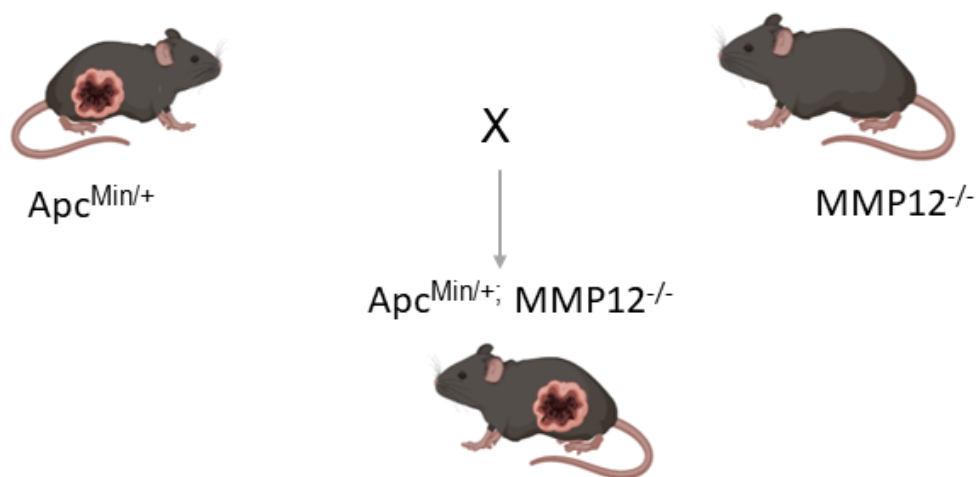

B

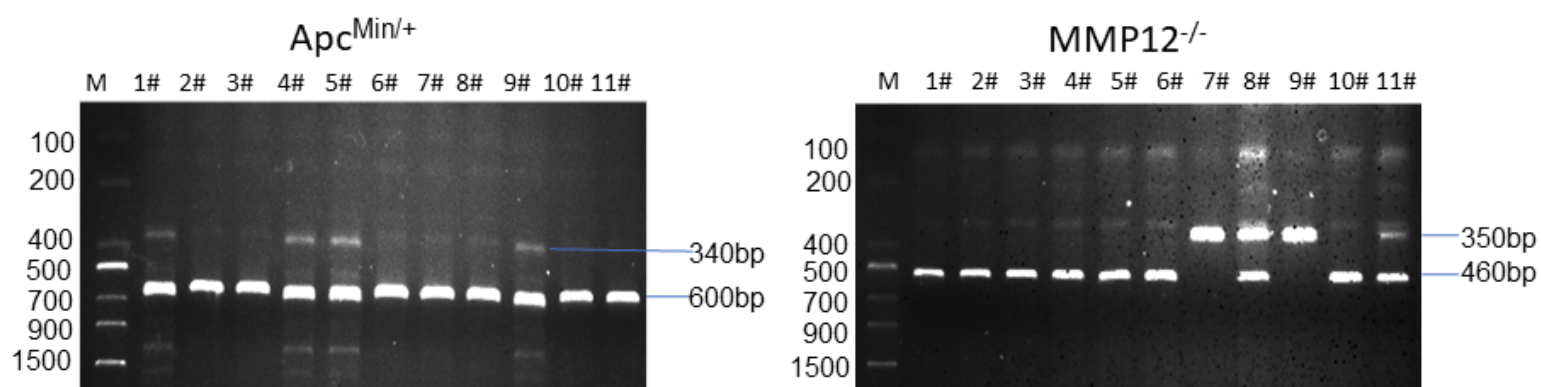

Figure S2

A

Insulin

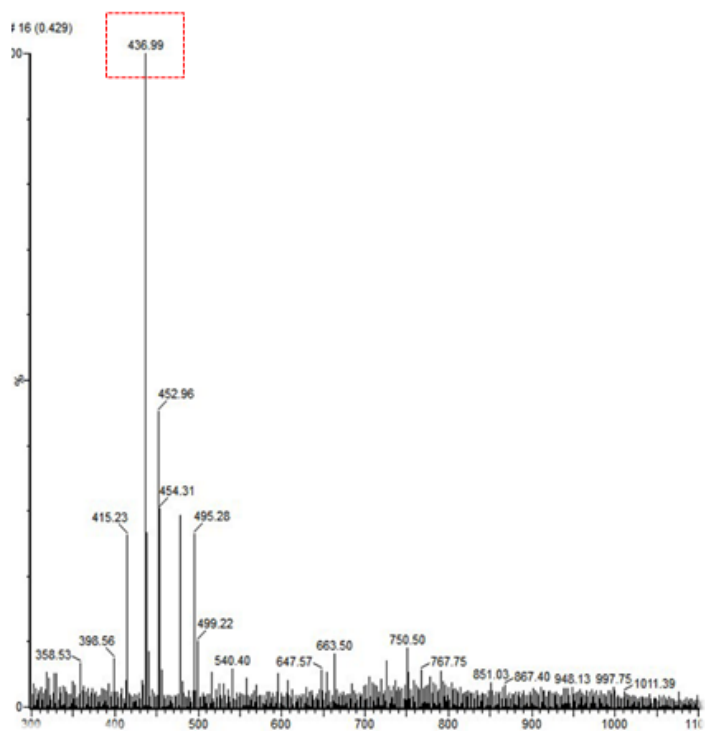

Insulin+MMP12

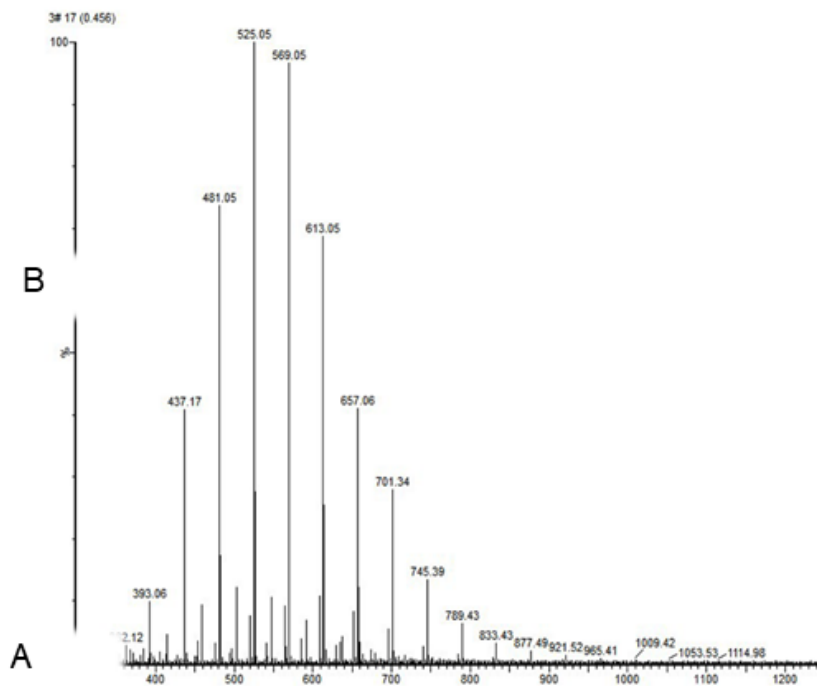

B

IGF-1

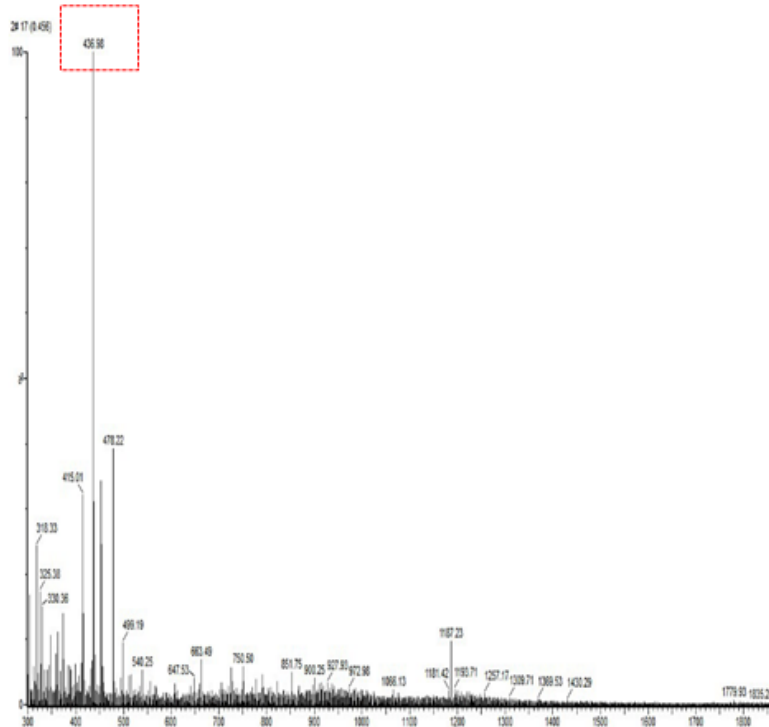

IGF-1+MMP12

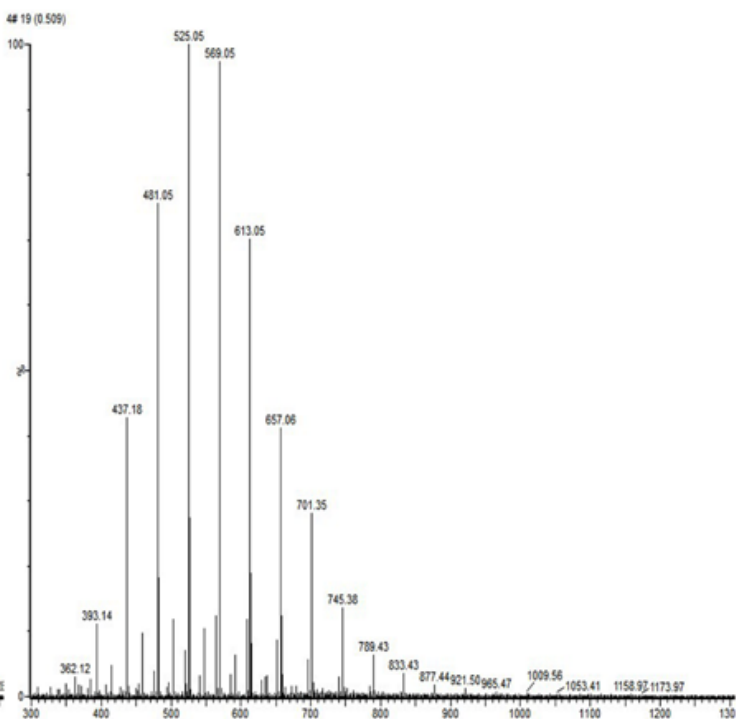

Figure S3

A

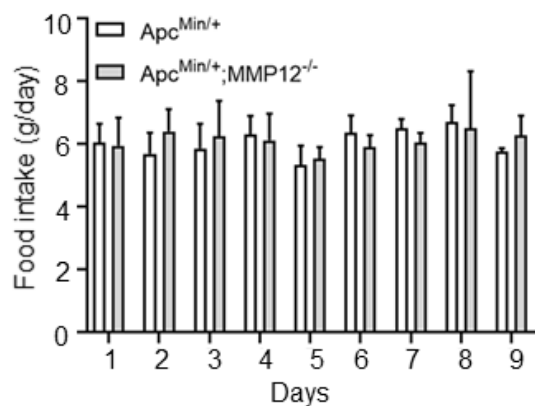

B

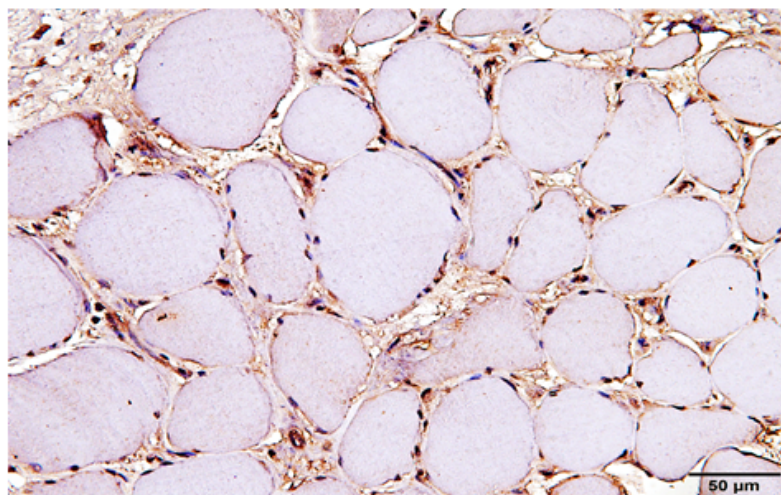

C

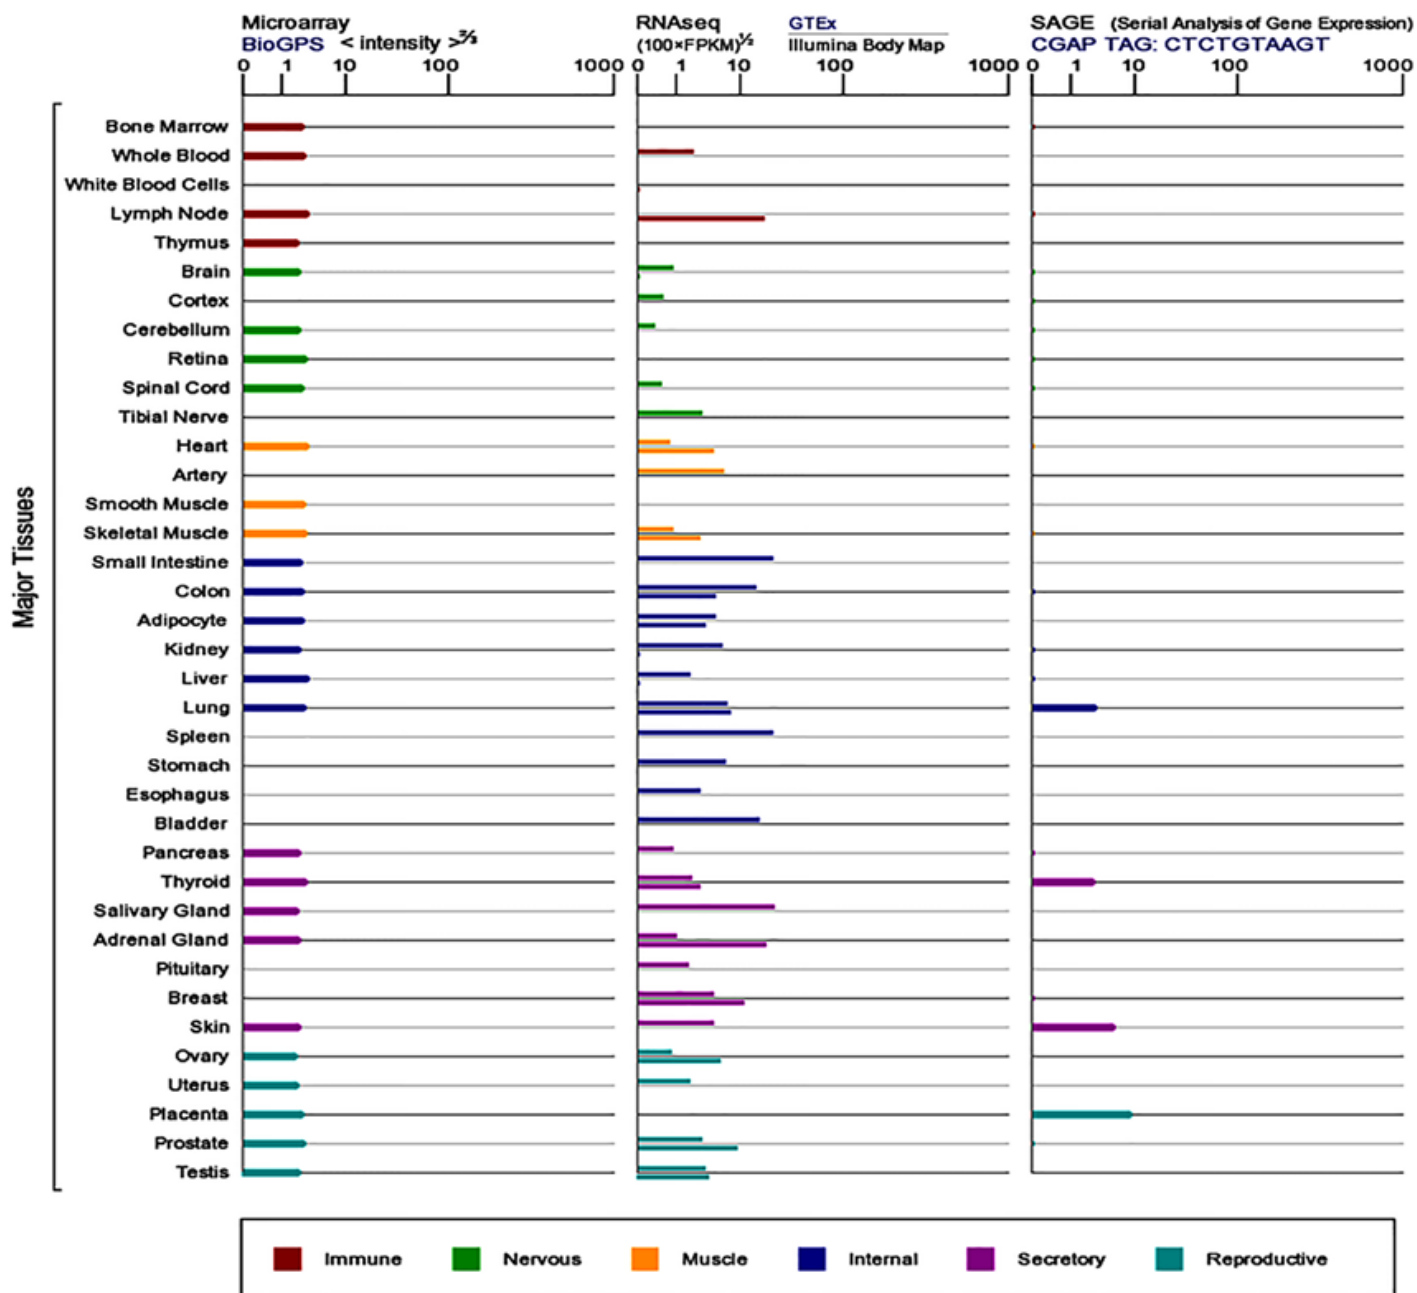



Figure S4

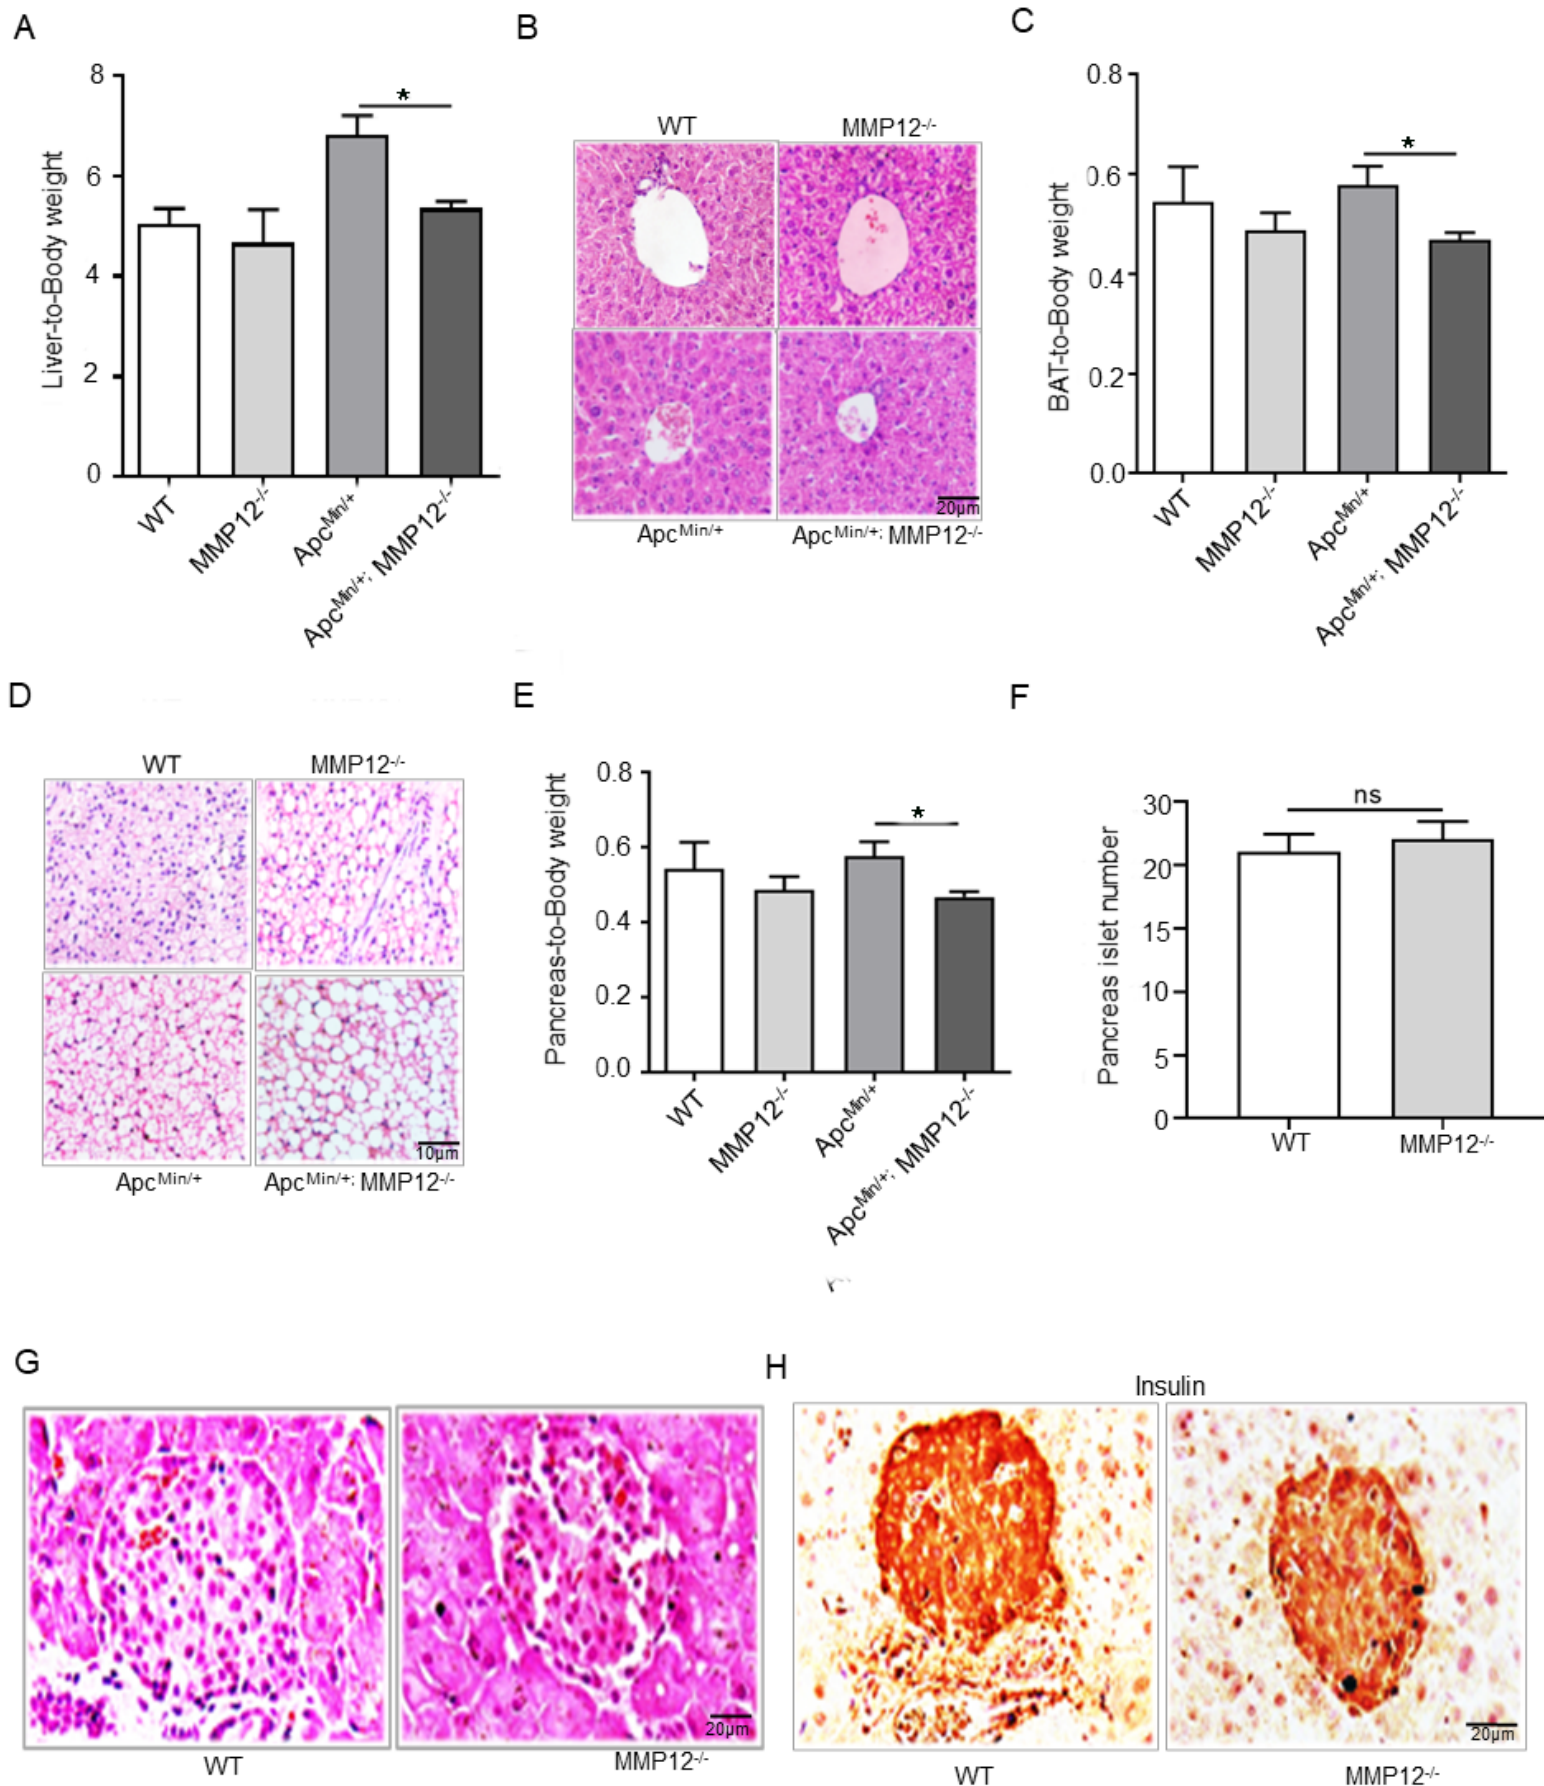

Figure S5

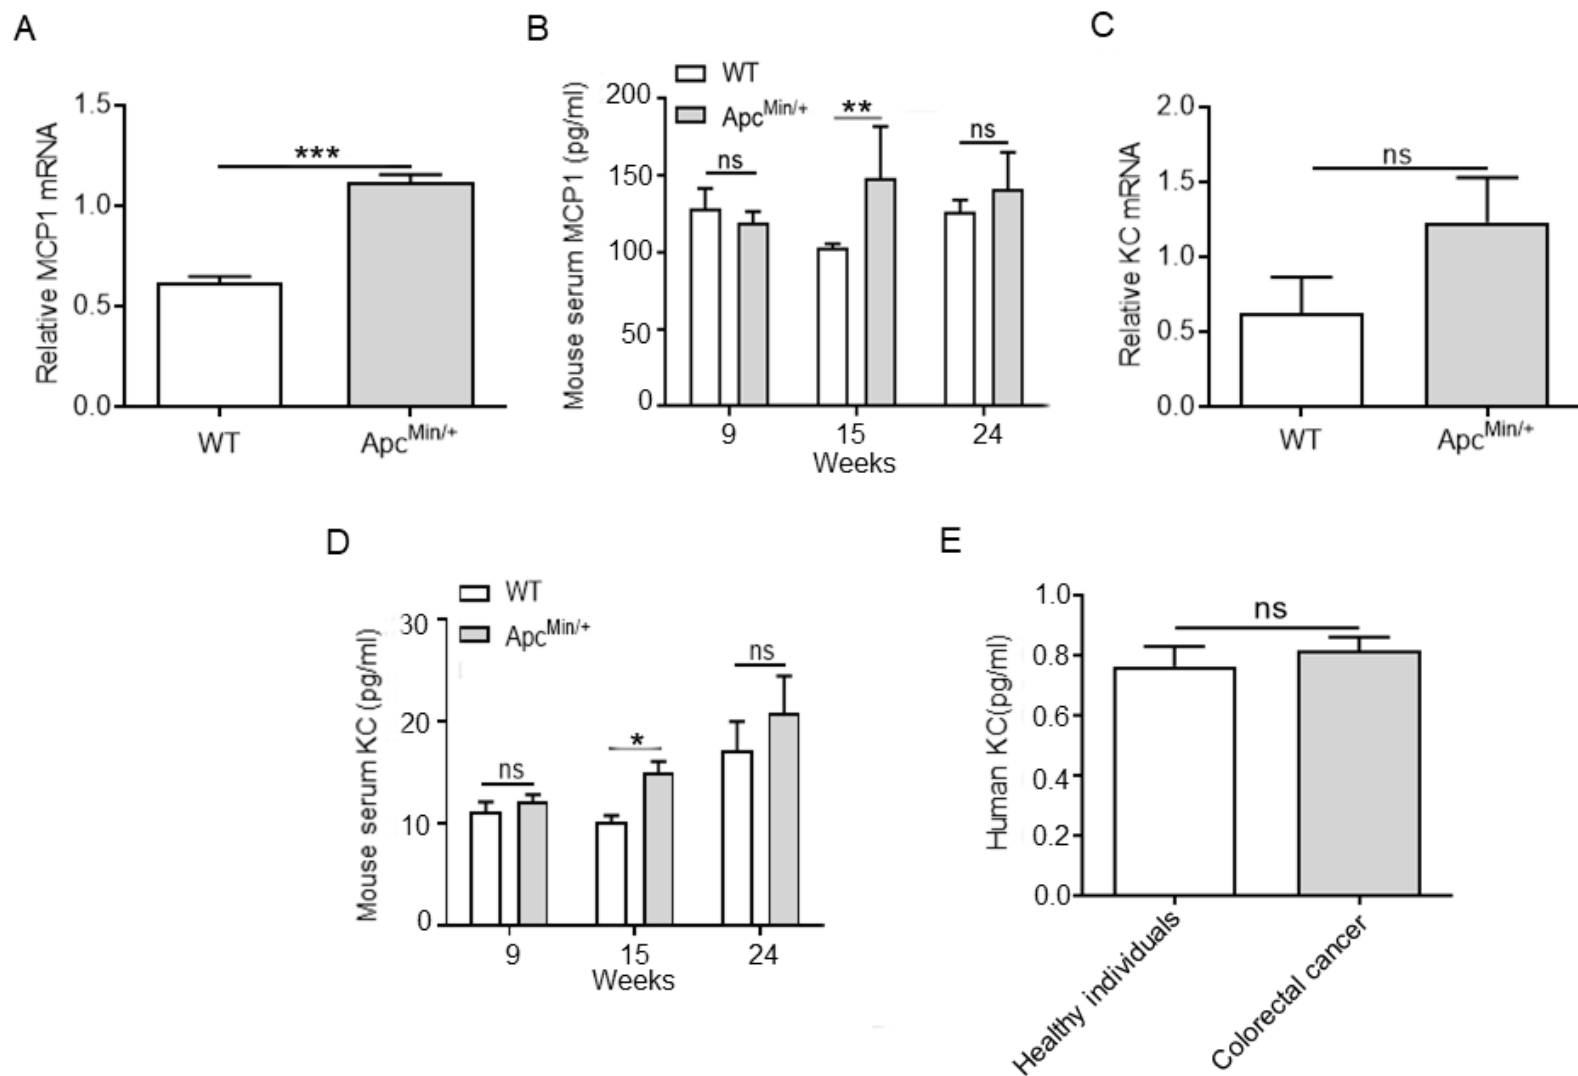

Figure S6

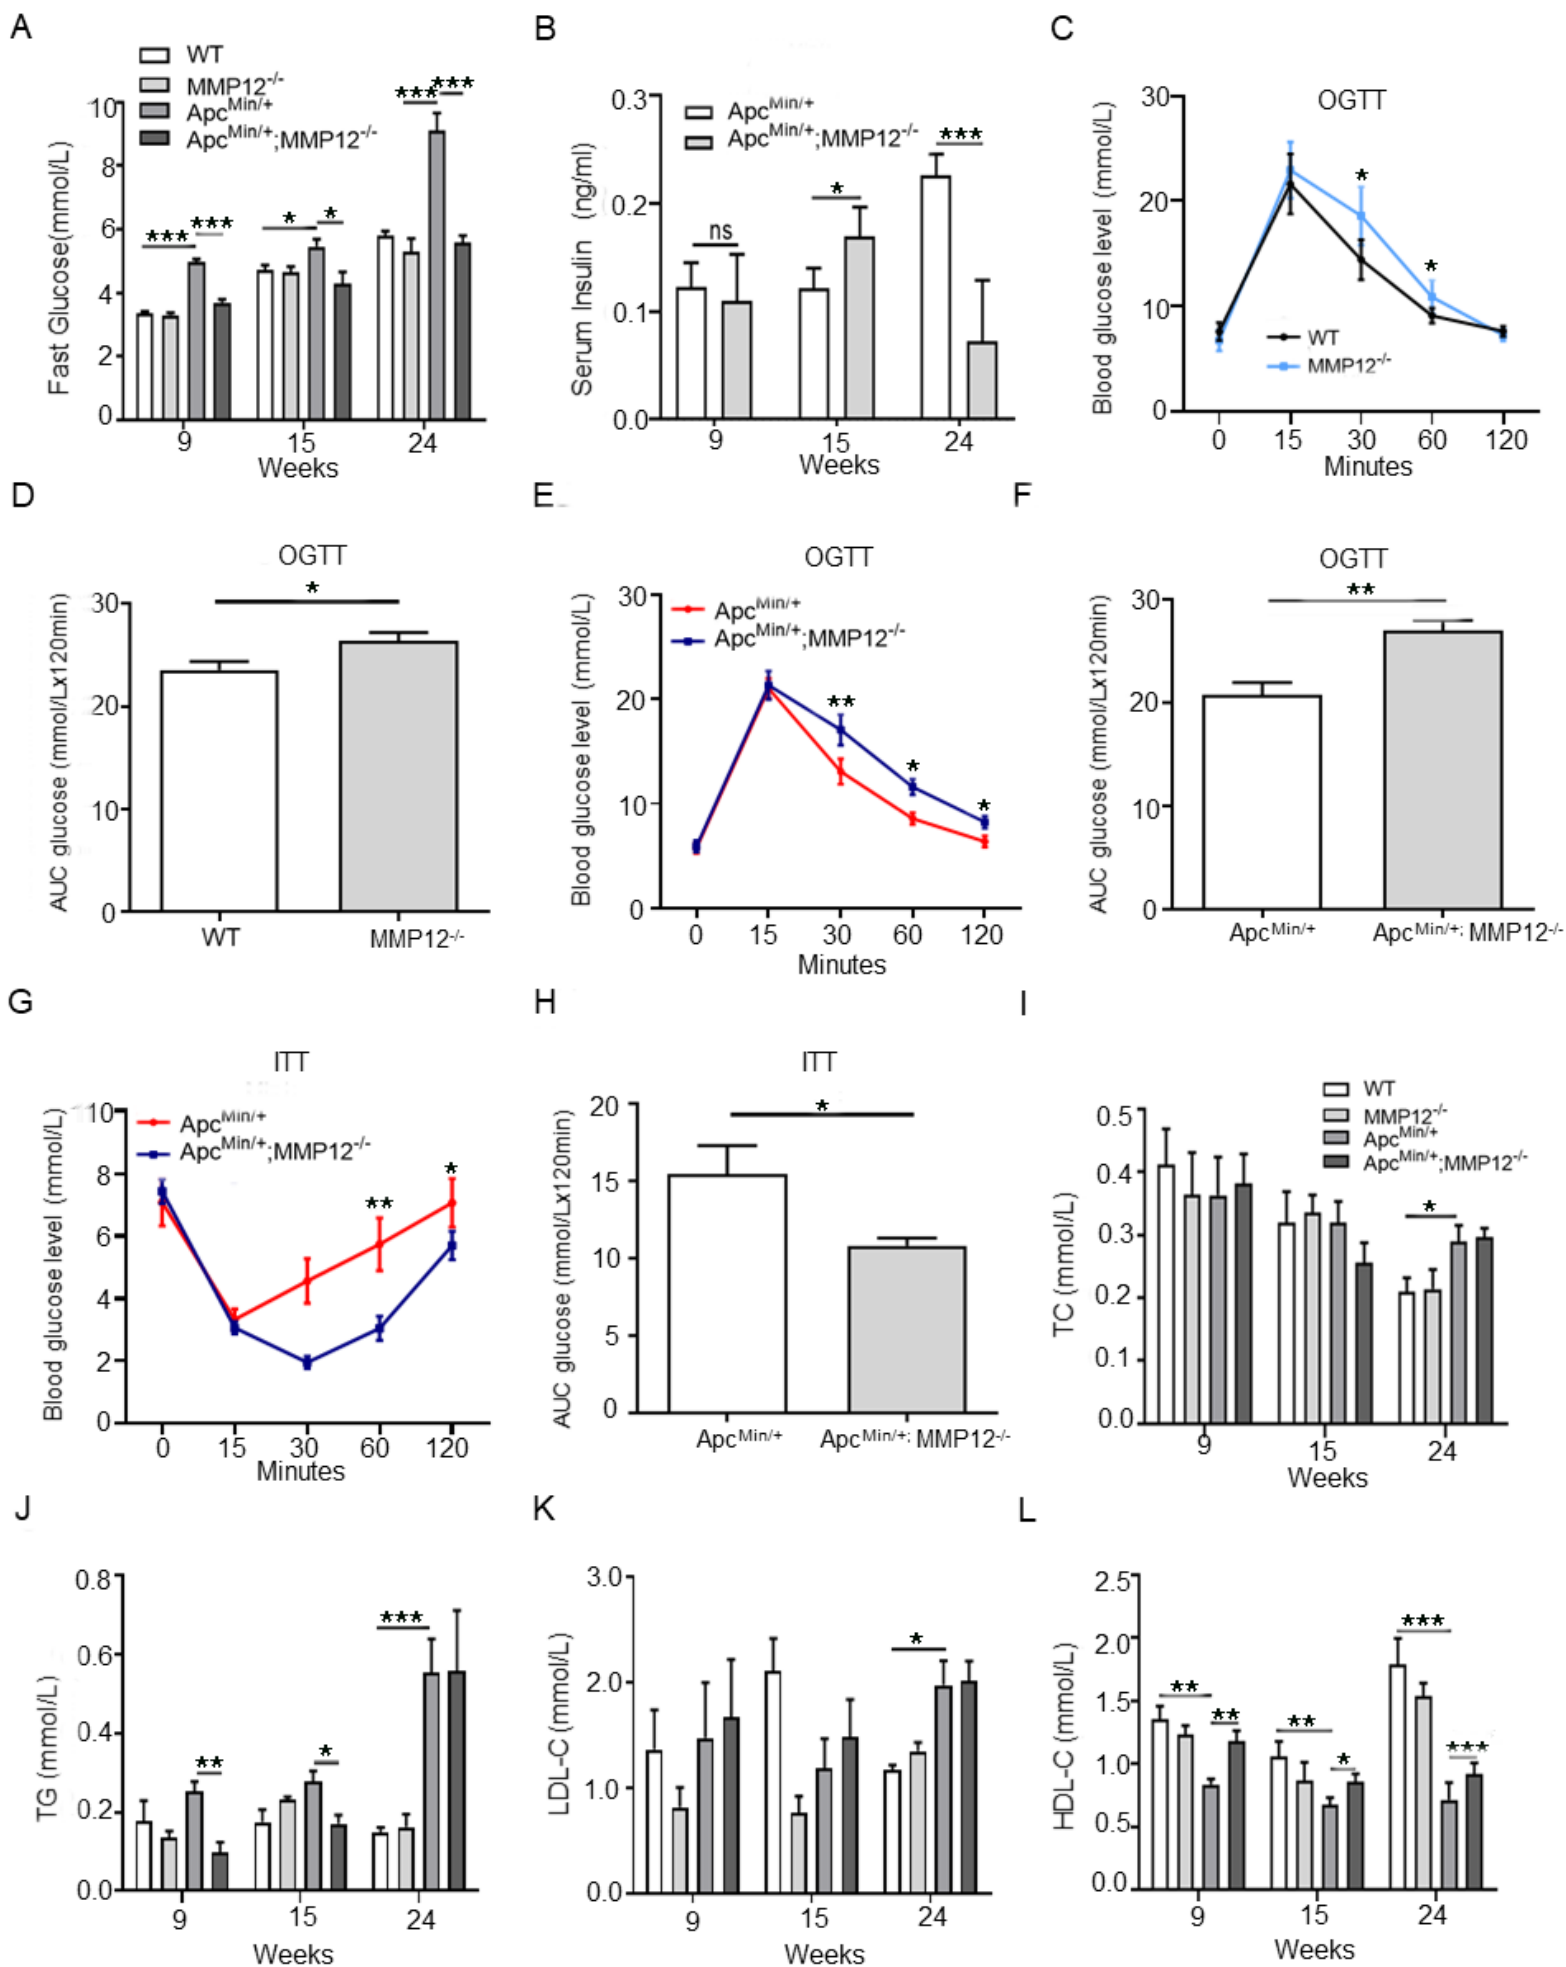

Figure S7

Cytokine Assay

| BLC<br>(CXCL13)         | CD30 Ligand<br>(TNFSF8) | Eotaxin-1<br>(CCL11)          | Eotaxin-2<br>(MPIF-2/CCL24) | Fas Ligand<br>(TNFSF6)  |
|-------------------------|-------------------------|-------------------------------|-----------------------------|-------------------------|
| Fractalkine<br>(CX3CL1) | GCSF                    | GM-CSF                        | IFN-gamma                   | IL-1 alpha<br>(IL-1 F1) |
| IL-1 beta<br>(IL-1 F2)  | IL-2                    | IL-3                          | IL-4                        | IL-6                    |
| IL-9                    | IL-10                   | IL-12 p40/p70                 | IL-12 p70                   | IL-13                   |
| IL-17A                  | I-TAC<br>(CXCL11)       | KC<br>(CXCL1)                 | Leptin                      | LIX                     |
| Lymphotactin<br>(XCL1)  | MCP-1<br>(CCL2)         | M-CSF                         | MIG<br>(CXCL9)              | MIP-1 alpha<br>(CCL3)   |
| MIP-1 gamma             | RANTES<br>(CCL5)        | SDF-1 alpha<br>(CXCL12 alpha) | I-309<br>(TCA-3/CCL1)       | TECK<br>(CCL25)         |
| TIMP-1                  | TIMP-2                  | TNF alpha                     | TNF RI<br>(TNFRSF1A)        | TNF RII<br>(TNFRSF1B)   |
